# Supplementary material for: Synthesis of 1-pyrroline derivatives via cyclization of terminal alkynes with 2-azaallyls
Source: Royal Society of Chemistry journal article supplement (doi:10.1039/d2ob00102k), 2022-01-01
Supplement: d2ob00102k1.pdf [file d2ob00102k1.pdf]

Electronic Supplementary Information (ESI)

**Transition-metal-free Synthesis of 1-Pyrroline Derivatives via  
Cyclization of Terminal Alkynes with 2-Azaallyls**

Quanxing Zi, Jielun Cong, Lun Li, Meng Yin, Jingfeng Zhao, Liang Li\*,

Xiaodong Yang\*

Key Laboratory of Medicinal Chemistry for Natural Resources, Ministry of Education; Yunnan Provincial Center for Research & Development of Natural Products; School of Chemical Science and Technology, Yunnan University, Kunming, 650091, P. R. China. E-mail: xdyang@ynu.edu.cn, liliang5758@sina.com

**TABLE OF CONTENT**

|                                                          |    |
|----------------------------------------------------------|----|
| 1. Preparation of ketimines.....                         | 2  |
| 2. Gram scale synthesis of <b>3ac</b> .....              | 2  |
| 3. Mechanistic study.....                                | 3  |
| 4. X-ray crystal structures of compound <b>3ac</b> ..... | 4  |
| 5. Supplementary References.....                         | 4  |
| 6. NMR Spectra.....                                      | 4  |
| 7. HNMR Spectra.....                                     | 33 |

## Supplementary Methods:

### Preparation of ketimines

Ketimines (**2a-2l**) were prepared according to literature procedures.<sup>1</sup>

### Procedure and characterization for the cyclization of ketimines and alkynes

#### Reaction Optimization:

An oven-dried 8 mL reaction vial equipped with a stir bar was charged with ethynylbenzene **1a** (0.2 mmol) and ketimine **2a** (0.1 mmol) under a nitrogen atmosphere in a glove box. A solution of base (0.3 mmol) in 0.5, 1 and 2 mL dry solvent was added by a "Titan" brand 1000  $\mu$ L pipettor to the reaction vial. The reaction mixture turned to a dark purple color. Then the vial was sealed with a cap, removed from the glove box, and stirred for 12 h at 25, 60, 80 and 100 °C. After the reaction was completed, the reaction mixture was opened to air, quenched with three drops of H<sub>2</sub>O, diluted with 3 mL of ethyl acetate, and filtered over a 2 cm pad of MgSO<sub>4</sub> and silica. The pad was rinsed with ethyl acetate (3  $\times$  2 mL), and the combined solutions were concentrated in vacuo. CDCl<sub>3</sub> and CH<sub>2</sub>Br<sub>2</sub> were then added sequentially to determine the yield of the reaction mixture. CH<sub>2</sub>Br<sub>2</sub> was used as an internal standard.

#### Gram scale synthesis of **3ac**

An oven-dried 100 mL Schlenk tube equipped with a stir bar was sealed with a rubber septum and degassed, purged with nitrogen (repeated three times). DCM (10 mL) was added under nitrogen via syringe through the rubber septum. (4-methoxyphenyl)methanamine (411.3 mg, 3.0 mmol) and benzophenone imine (543.3 mg, 3.0 mmol) were added under nitrogen via syringe through the rubber septum. The reaction was stirred at 23 °C for 12 h, the solvent was completely removed in *vacuo* and the tube was filled with nitrogen. A solution (prepared in the glove box) of ethynylbenzene **1a** (606.1 mg, 6.0 mmol) in 10 mL anhydrous DME was added to the Schlenk tube via syringe through the rubber septum. Next, a solution of KN(SiMe<sub>3</sub>)<sub>2</sub> (1.8 g, 12.0 mmol) in 20 mL anhydrous DME was added by

syringe through the rubber septum. The reaction mixture was stirred for 12 h in total at 100 °C, opened to air, and quenched with 3 mL of H<sub>2</sub>O. The layers were separated and the aqueous layer was extracted with DCM (3 X 5 mL). The combined organic layers were concentrated in *vacuo*. The crude product was separated by flash chromatography on deactivated silica gel hexanes to give the product **3ca** in 86% yield (1.04 g).

## Mechanistic study

### a. Evidence of the mechanism goes through **4aa**.

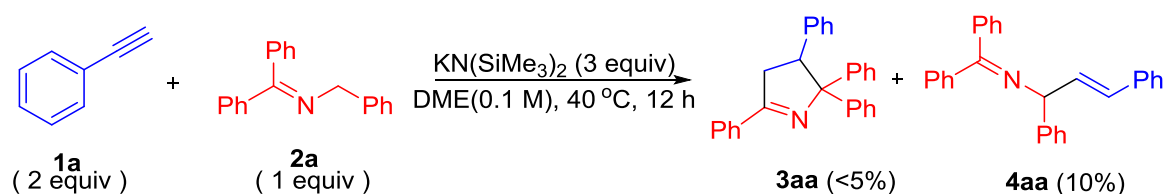

The reaction was performed following the General Procedure with ethynylbenzene **1a** (40.8 mg, 0.4 mmol) and *N*-benzyl-1,1-diphenylmethanimine **2a** (54.2 mg, 0.2 mmol). The crude product was separated by flash chromatography on deactivated silica gel hexanes to give the intermediate **4aa** in 10% yield (7.5 mg).

**4aa**(major): colorless liquid,  $R_f = 0.39$  (hexanes:ethyl acetate = 30:1); <sup>1</sup>H NMR (600 MHz, Chloroform-*d*)  $\delta$  7.91 (d,  $J = 7.6$  Hz, 2H), 7.61 – 7.55 (m, 5H), 7.48 (dt,  $J = 18.9, 7.4$  Hz, 7H), 7.43 – 7.29 (m, 6H), 6.70 (dd,  $J = 16.0, 6.6$  Hz, 1H), 6.57 (d,  $J = 15.9$  Hz, 1H), 5.33 (d,  $J = 6.5$  Hz, 1H) ppm; <sup>13</sup>C{<sup>1</sup>H} NMR (150 MHz, Chloroform-*d*)  $\delta$  167.7, 143.6, 140.1, 137.4, 137.0, 132.8, 130.3, 129.6, 128.9, 128.9, 128.7, 128.7, 128.6, 128.5, 128.3, 127.9, 127.6, 127.5, 127.1, 126.6, 68.8 ppm; HRMS (ESI<sup>+</sup>)  $[\text{M}+\text{H}]^+$  calc'd for C<sub>28</sub>H<sub>24</sub>N<sup>+</sup>: 374.1903, found: 374.1906.

### b. **4aa** is converted to **3aa**.

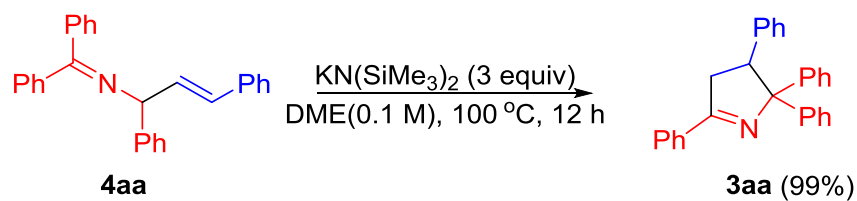

The reaction was performed following the General Procedure with **4aa**. The crude product was separated by flash chromatography on deactivated silica gel hexanes to give the product **3aa** in 99% yield (7.4 mg).

### X-ray crystal structures of compound **3ac**.

CCDC 2085476 contains the supplementary crystallographic data for compound **3ac**. The data can be obtained free of charge from The Cambridge Crystallographic Data Center via [www.ccdc.cam.ac.uk/data\\_request/cif](http://www.ccdc.cam.ac.uk/data_request/cif).

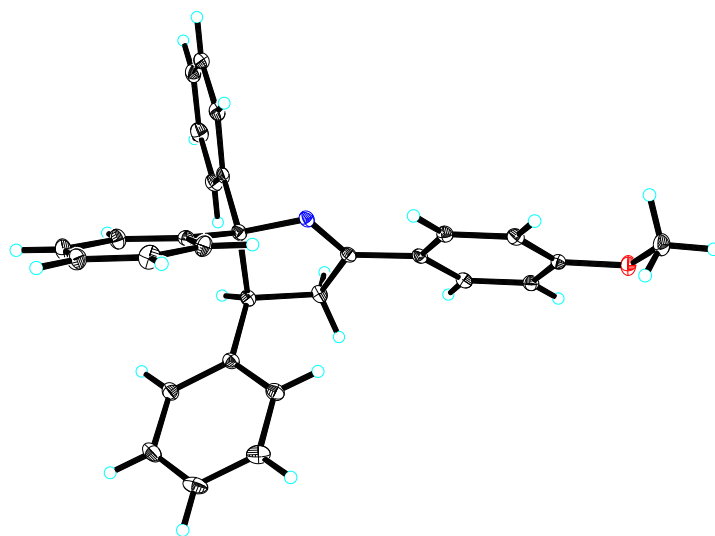

### Supplementary References

- (1) Matin, J. O'D.; William, D. B.; Wiiiim, A. B.; Wiiiim, N. J.; Keith, K.; Brigitte, L.; Robin, L. P.; Frederick, G. B.; Susan, R. M., *J. Am. Chem. Soc.* **1998**, *110*, 8520-8525

### NMR Spectra

**Figure S1.**  $^1\text{H}$  NMR spectra (600 MHz, Chloroform-*d*) of 2,2,3,5-tetraphenyl-3,4-dihydro-2*H*-pyrrole (3aa).

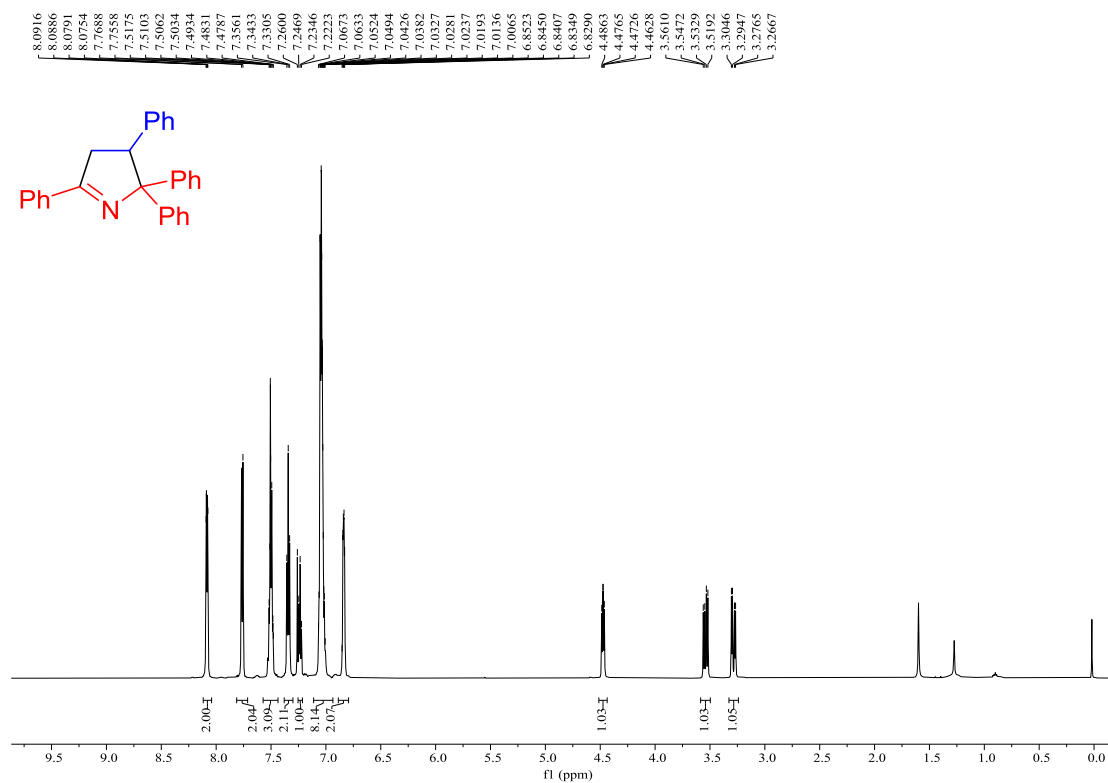

**Figure S2.**  $^{13}\text{C}\{^1\text{H}\}$  NMR spectra (150 MHz, Chloroform-*d*) of 2,2,3,5-tetraphenyl-3,4-dihydro-2*H*-pyrrole (3aa).

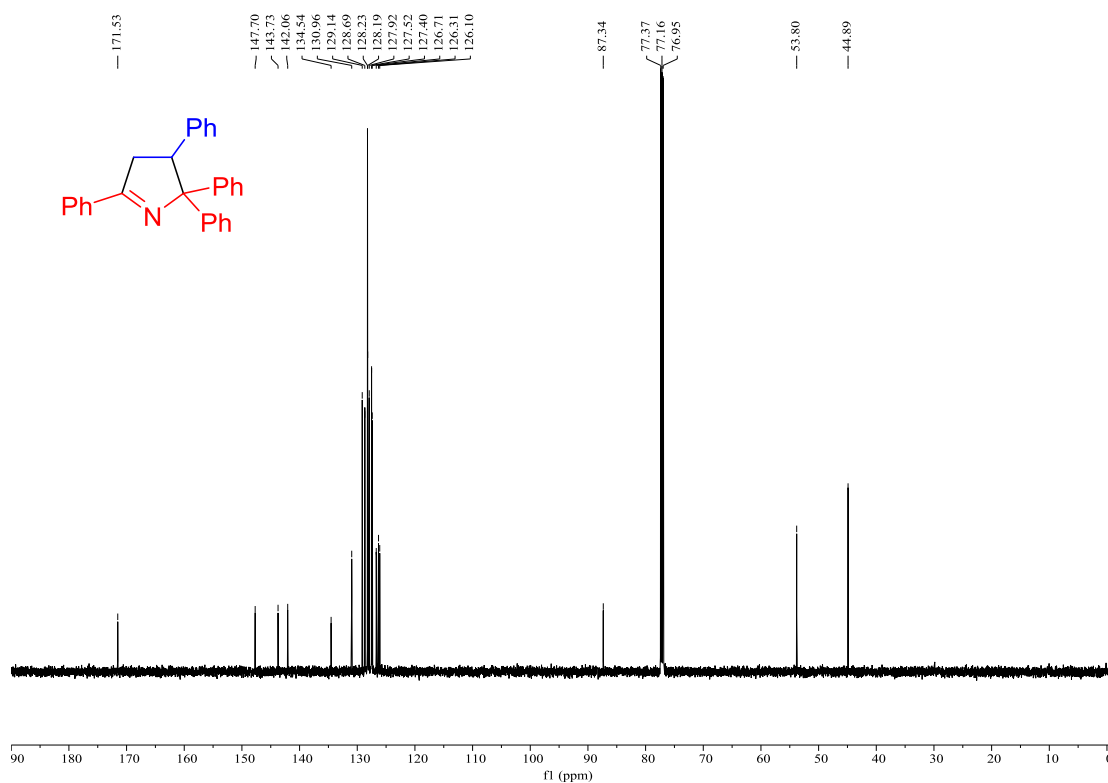

**Figure S3.**  $^1\text{H}$  NMR spectra (400 MHz, Chloroform-*d*) of 2,2,5-triphenyl-3-(*p*-tolyl)-3,4-dihydro-2*H*-pyrrole (3ba).

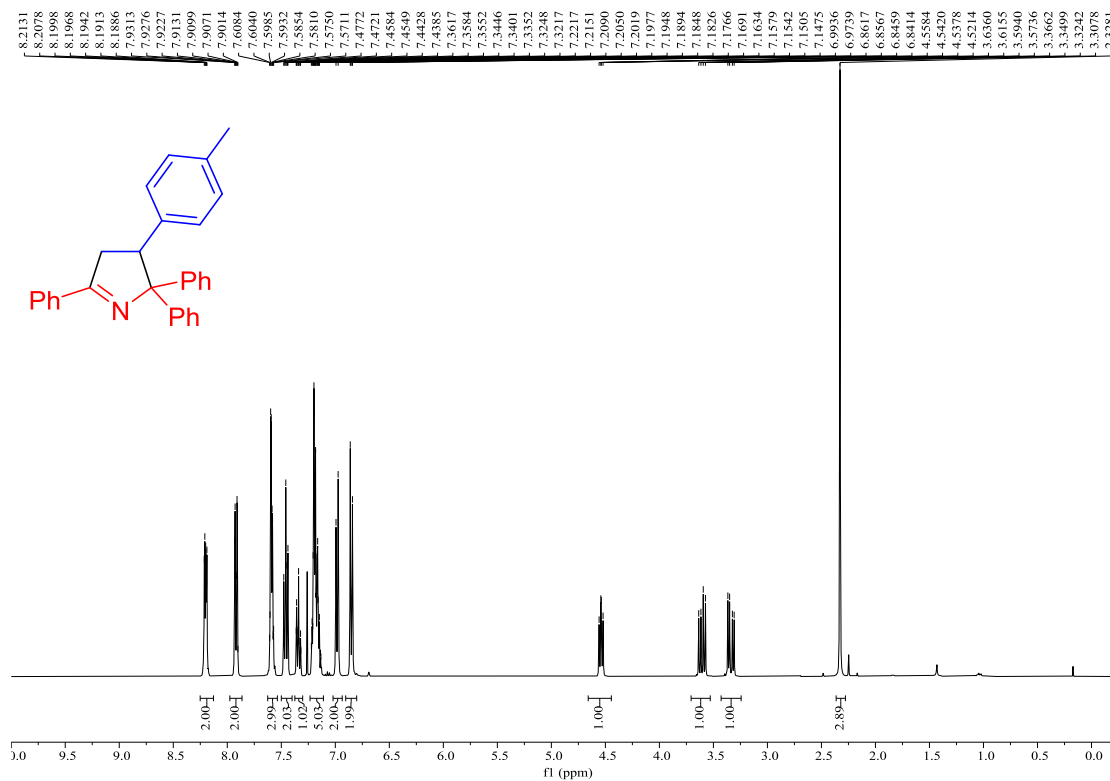

**Figure S4.**  $^{13}\text{C}\{^1\text{H}\}$  NMR spectra (100 MHz, Chloroform-*d*) of 2,2,5-triphenyl-3-(*p*-tolyl)-3,4-dihydro-2*H*-pyrrole (3ba).

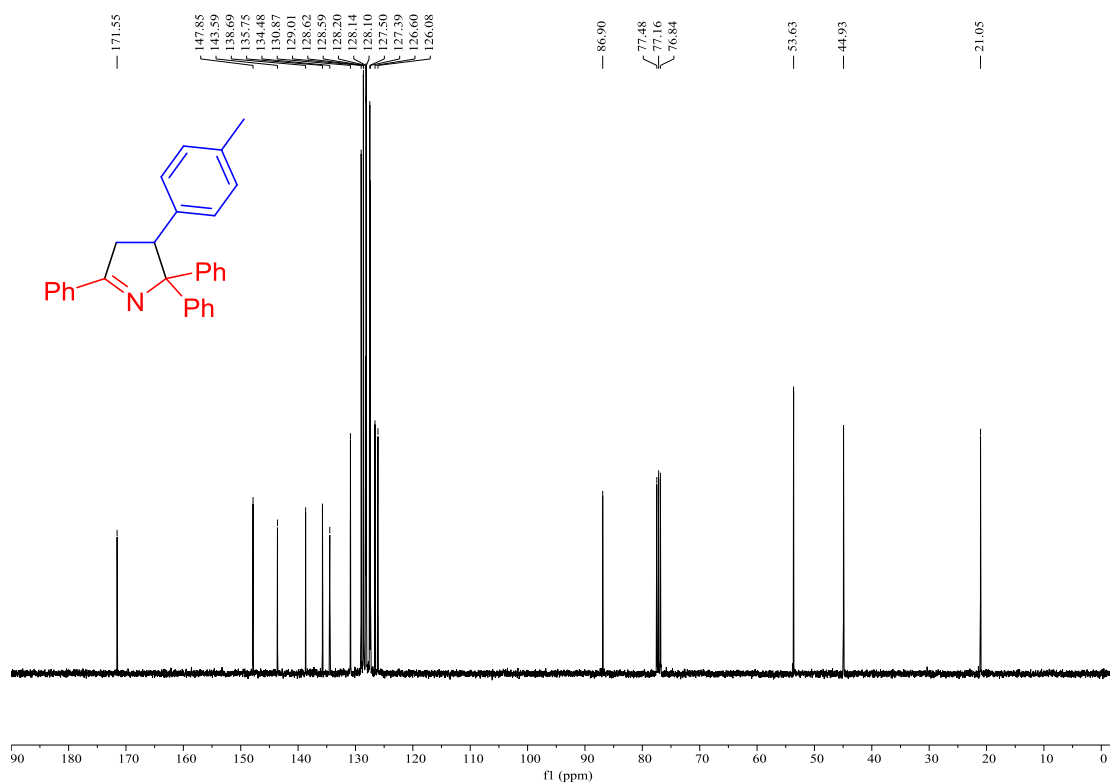

**Figure S5.**  $^1\text{H}$  NMR spectra (400 MHz, Chloroform-*d*) of 3-(4-(*tert*-butyl)phenyl)-2,2,5-triphenyl-3,4-dihydro-2*H*-pyrrole (3ca).

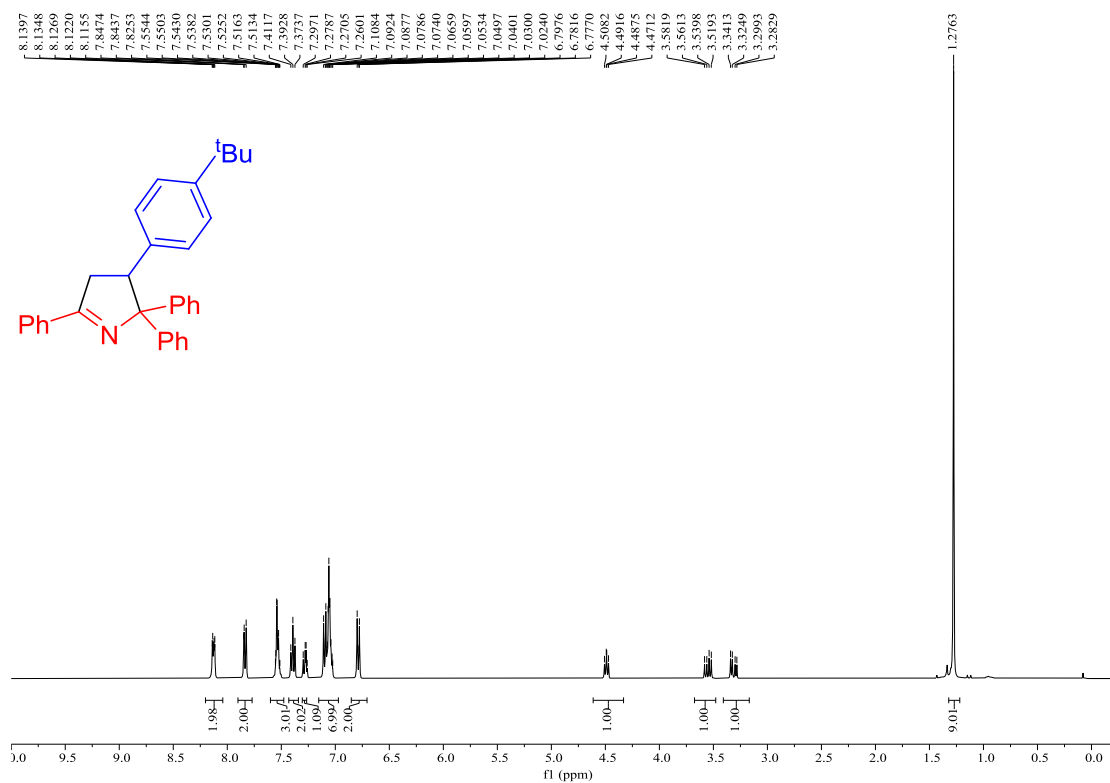

**Figure S6.**  $^{13}\text{C}\{^1\text{H}\}$  NMR spectra (100 MHz, Chloroform-*d*) of 3-(4-(*tert*-butyl)phenyl)-2,2,5-triphenyl-3,4-dihydro-2*H*-pyrrole (3ca).

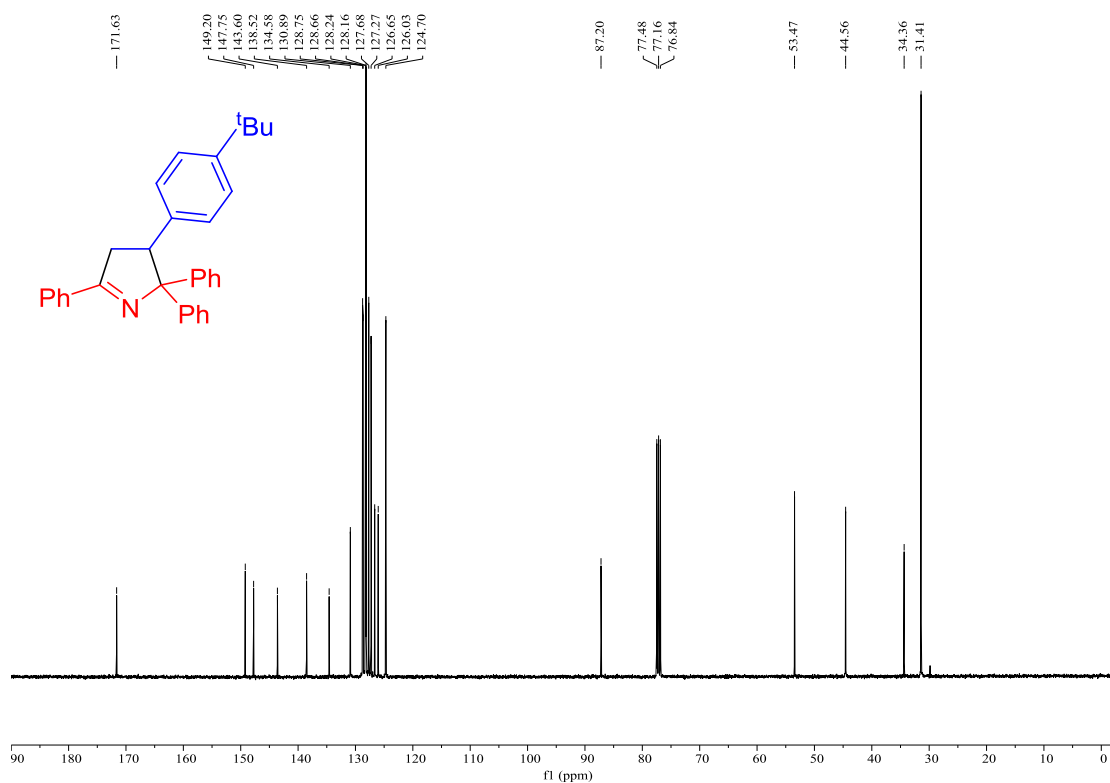

**Figure S7.**  $^1\text{H}$  NMR spectra (600 MHz, Chloroform-*d*) of 3-(4-ethoxyphenyl)-2,2,5-triphenyl-3,4-dihydro-2*H*-pyrrole (3da).

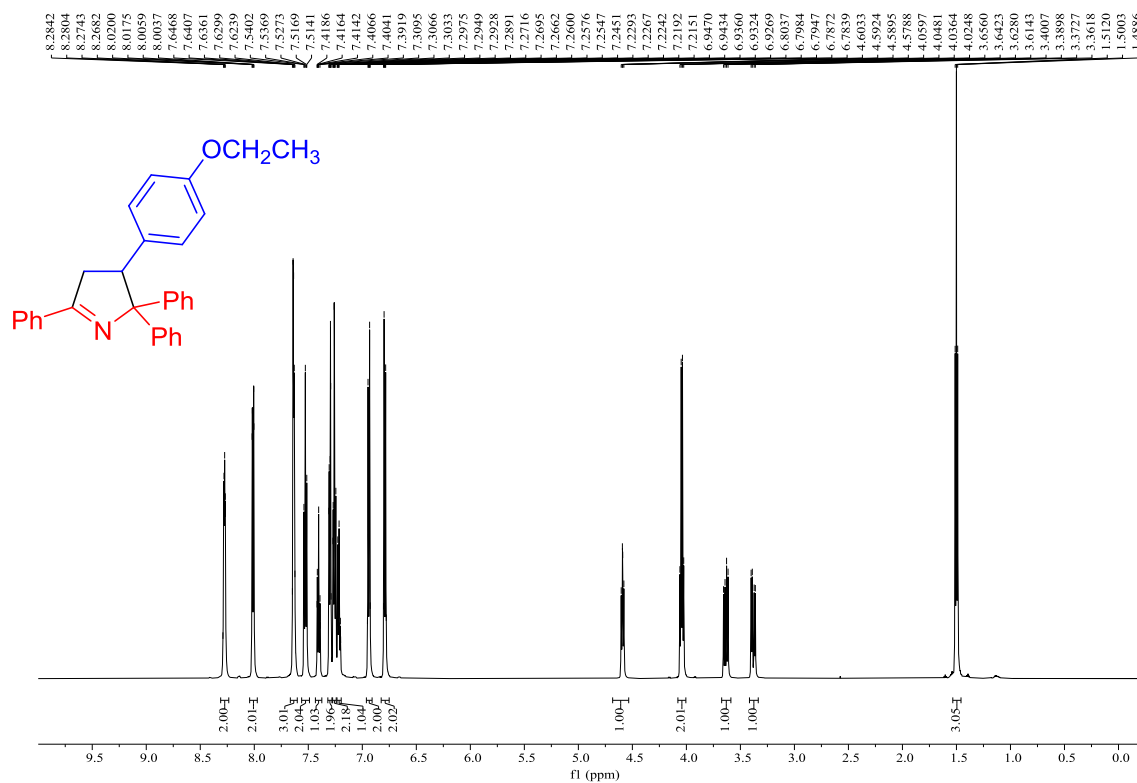

**Figure S8.**  $^{13}\text{C}\{^1\text{H}\}$  NMR spectra (150 MHz, Chloroform-*d*) of 3-(4-ethoxyphenyl)-2,2,5-triphenyl-3,4-dihydro-2*H*-pyrrole (3da).

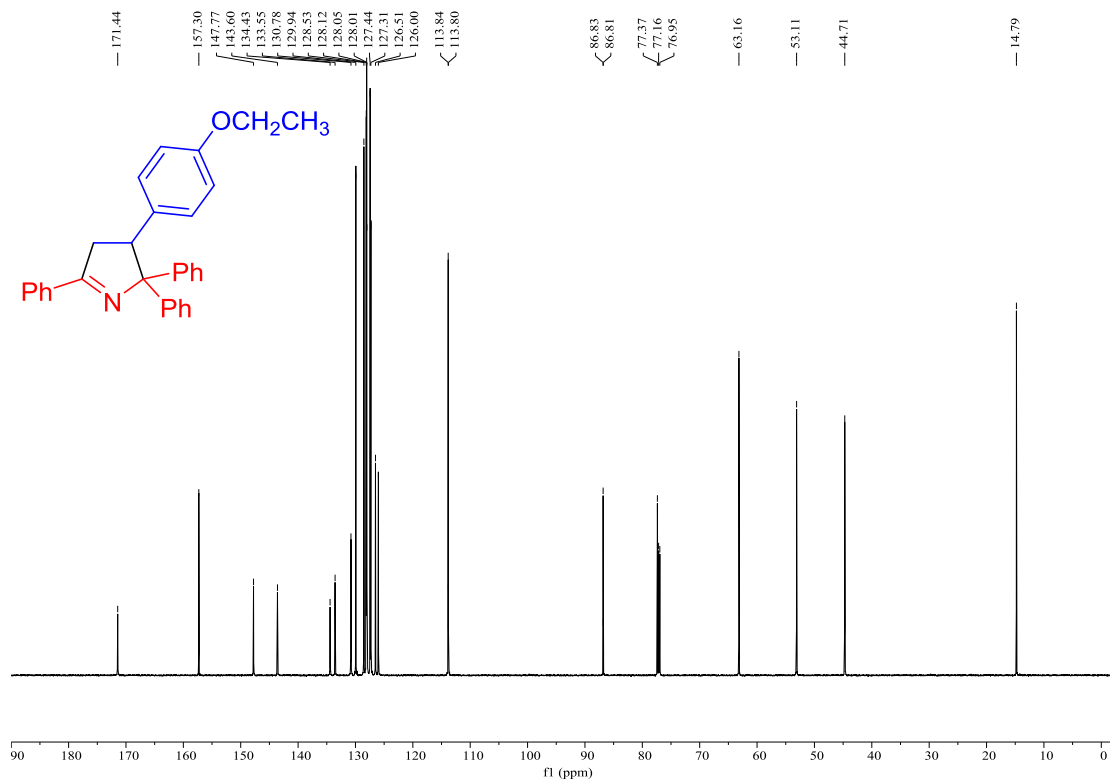



**Figure S9.**  $^1\text{H}$  NMR spectra (400 MHz, Chloroform-*d*) of 2,2,5-triphenyl-3-(4-(trifluoromethoxy)phenyl)-3,4-dihydro-2*H*-pyrrole (3ea).

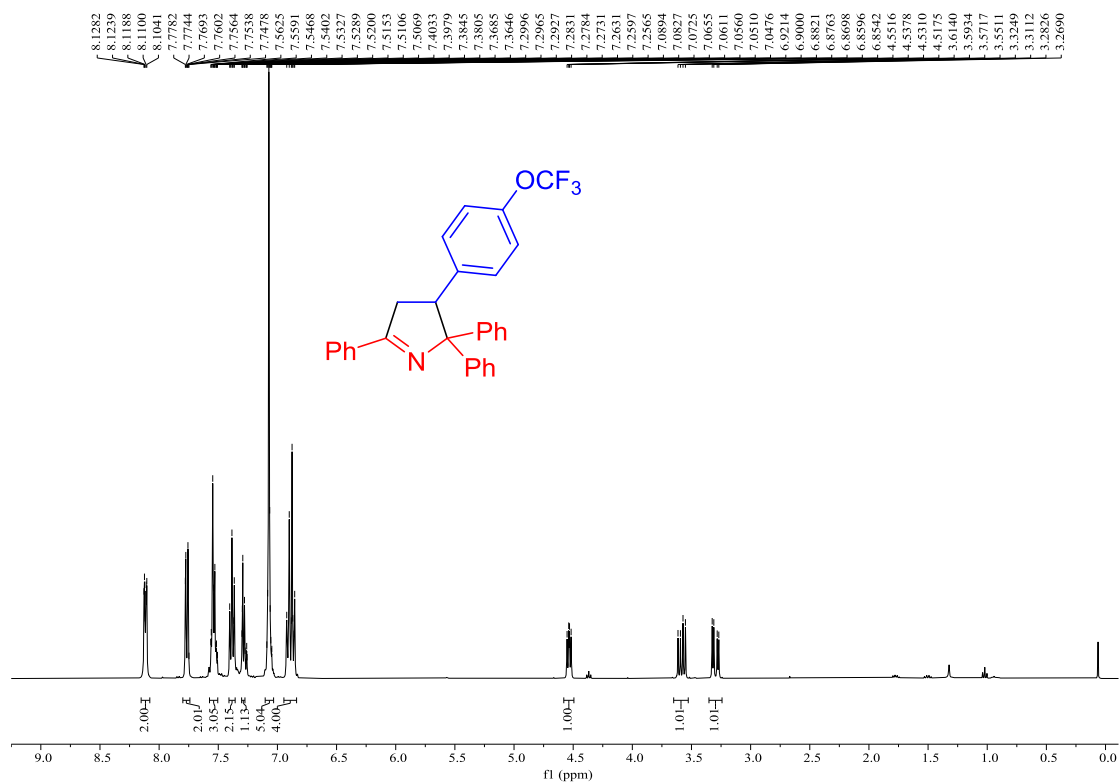

**Figure S10.**  $^{13}\text{C}\{^1\text{H}\}$  NMR spectra (100 MHz, Chloroform-*d*) of 2,2,5-triphenyl-3-(4-(trifluoromethoxy)phenyl)-3,4-dihydro-2*H*-pyrrole (3ea).

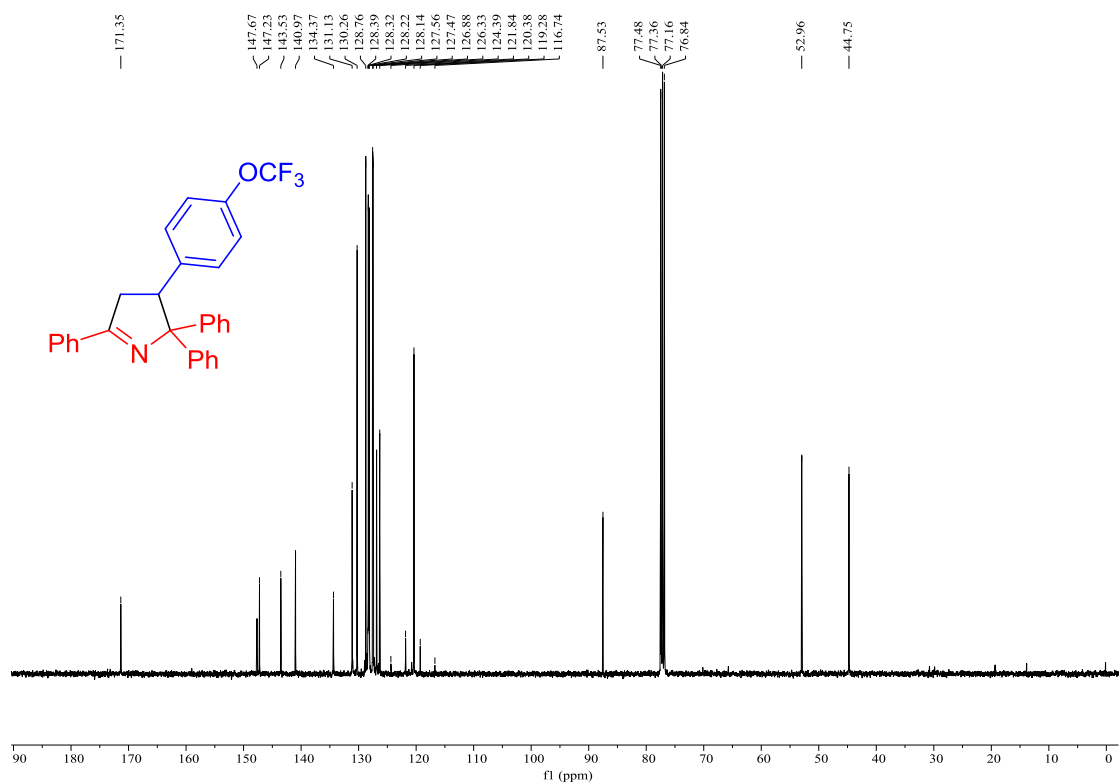

**Figure S11.**  $^{19}\text{F}$  NMR spectra (376 MHz, Chloroform-*d*) of 2,2,5-triphenyl-3-(4-(trifluoromethoxy)phenyl)-3,4-dihydro-2*H*-pyrrole (3ea).

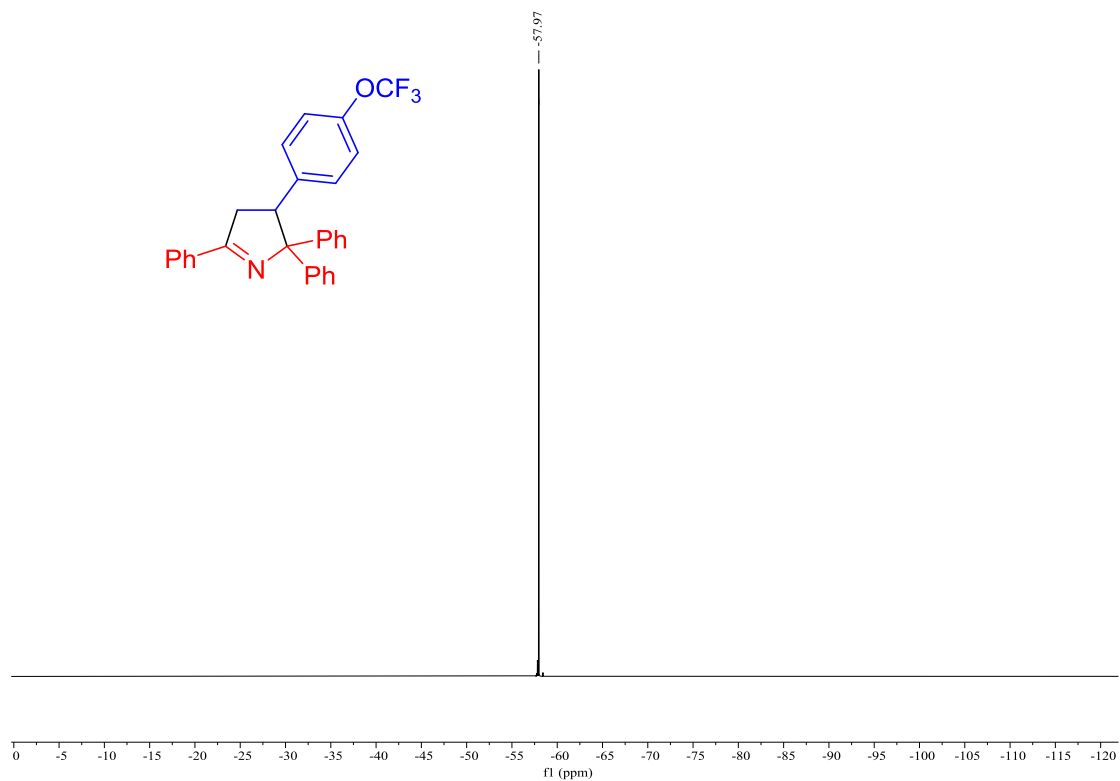

**Figure S12.**  $^1\text{H}$  NMR spectra (400 MHz, Chloroform-*d*) of 3-([1,1'-biphenyl]-4-yl)-2,2,5-triphenyl-3,4-dihydro-2*H*-pyrrole (3fa).

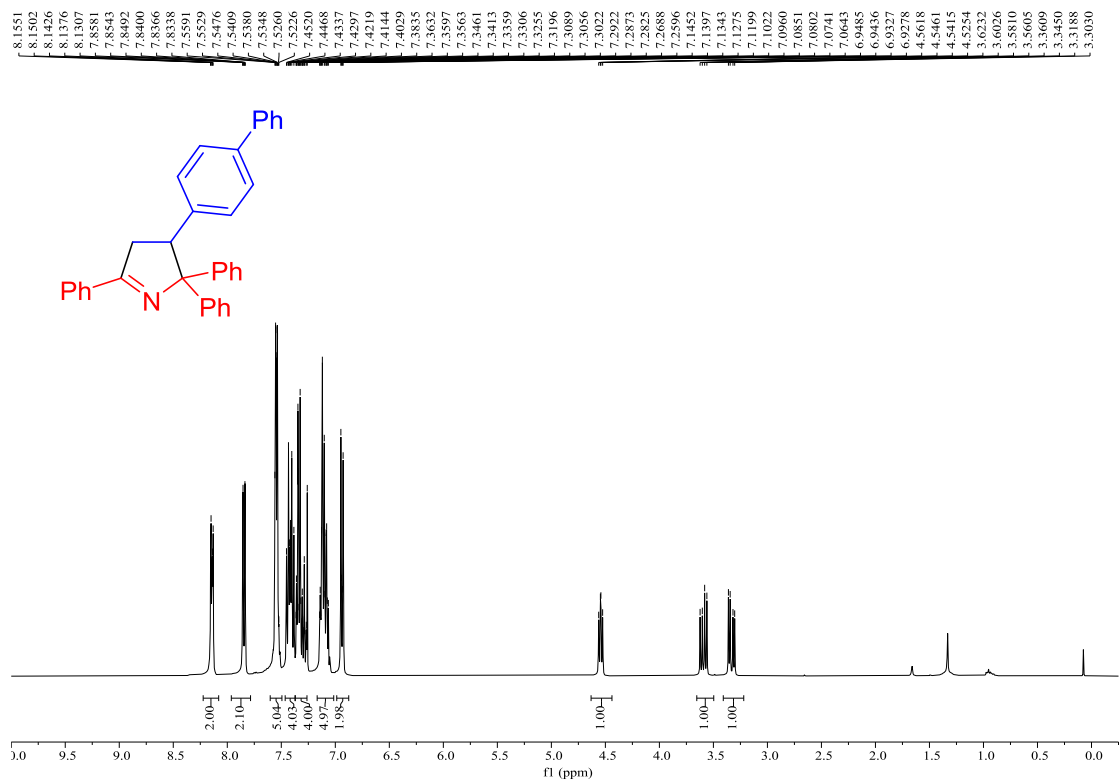

**Figure S13.**  $^{13}\text{C}\{^1\text{H}\}$  NMR spectra (100 MHz, Chloroform-*d*) of 3-((1,1'-biphenyl)-4-yl)-2,2,5-triphenyl-3,4-dihydro-2*H*-pyrrole (3fa).

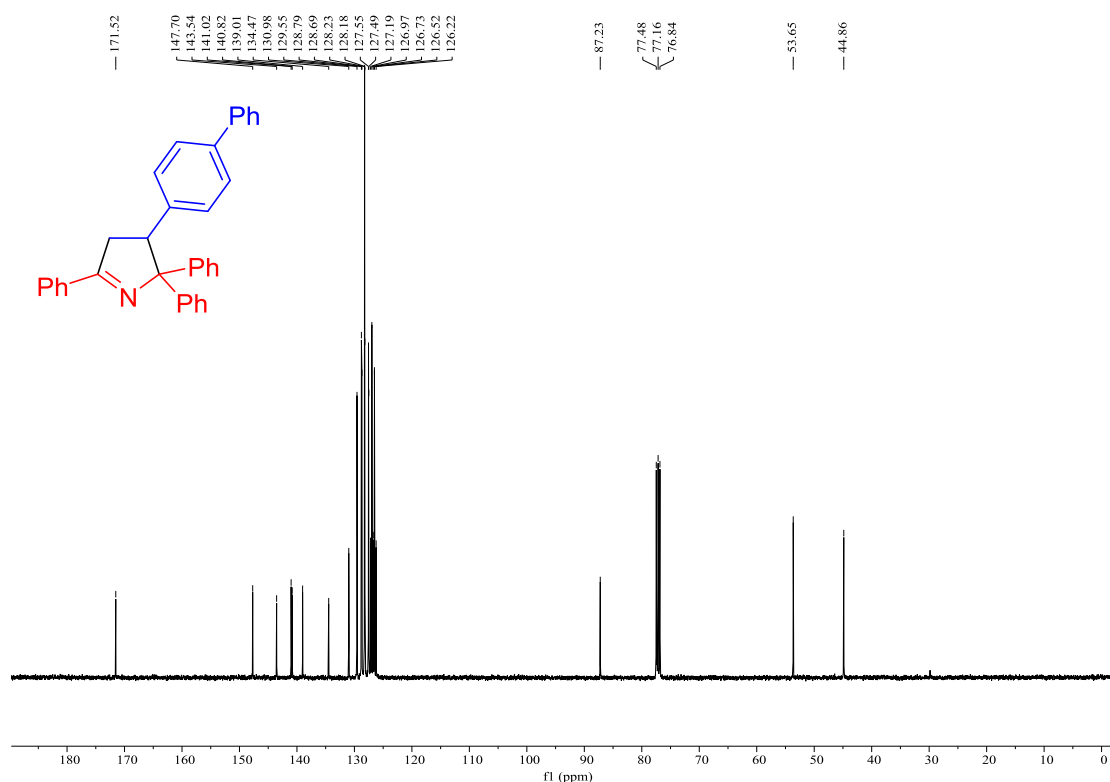

**Figure S14.**  $^1\text{H}$  NMR spectra (400 MHz, Chloroform-*d*) of 3-(4-fluorophenyl)-2,2,5-triphenyl-3,4-dihydro-2*H*-pyrrole (3ga).

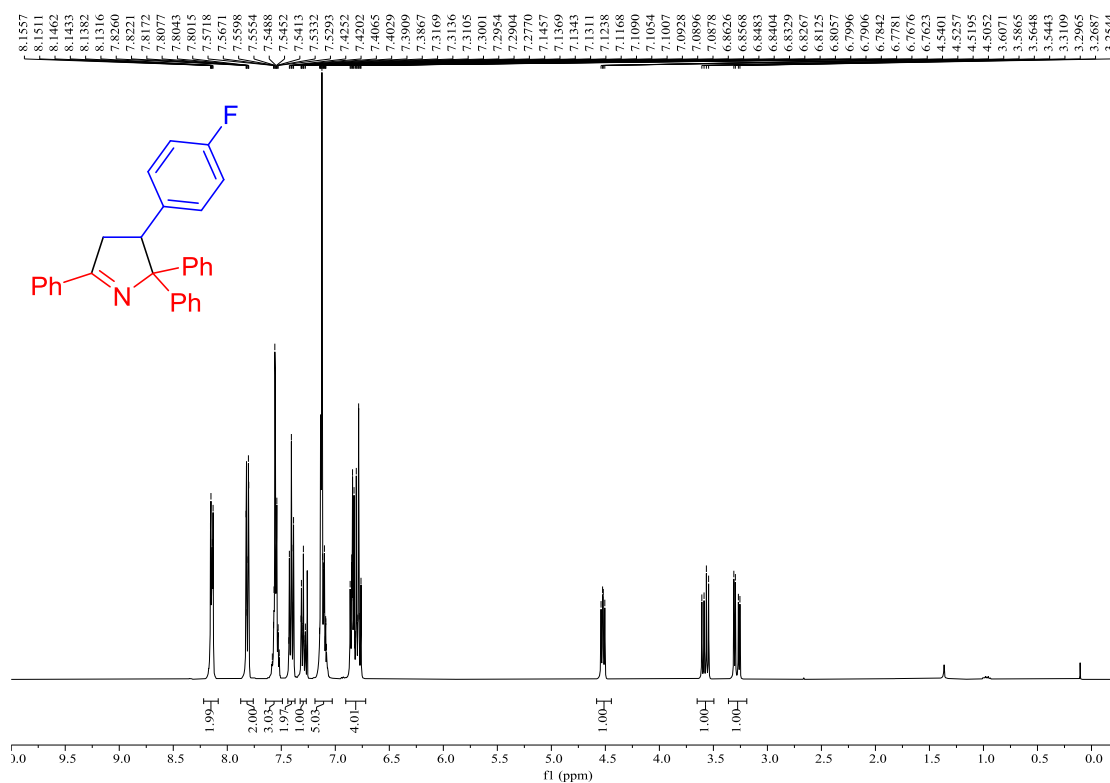

**Figure S15.**  $^{13}\text{C}\{^1\text{H}\}$  NMR spectra (100 MHz, Chloroform-*d*) of 3-(4-fluorophenyl)-2,2,5-triphenyl-3,4-dihydro-2*H*-pyrrole (3ga).

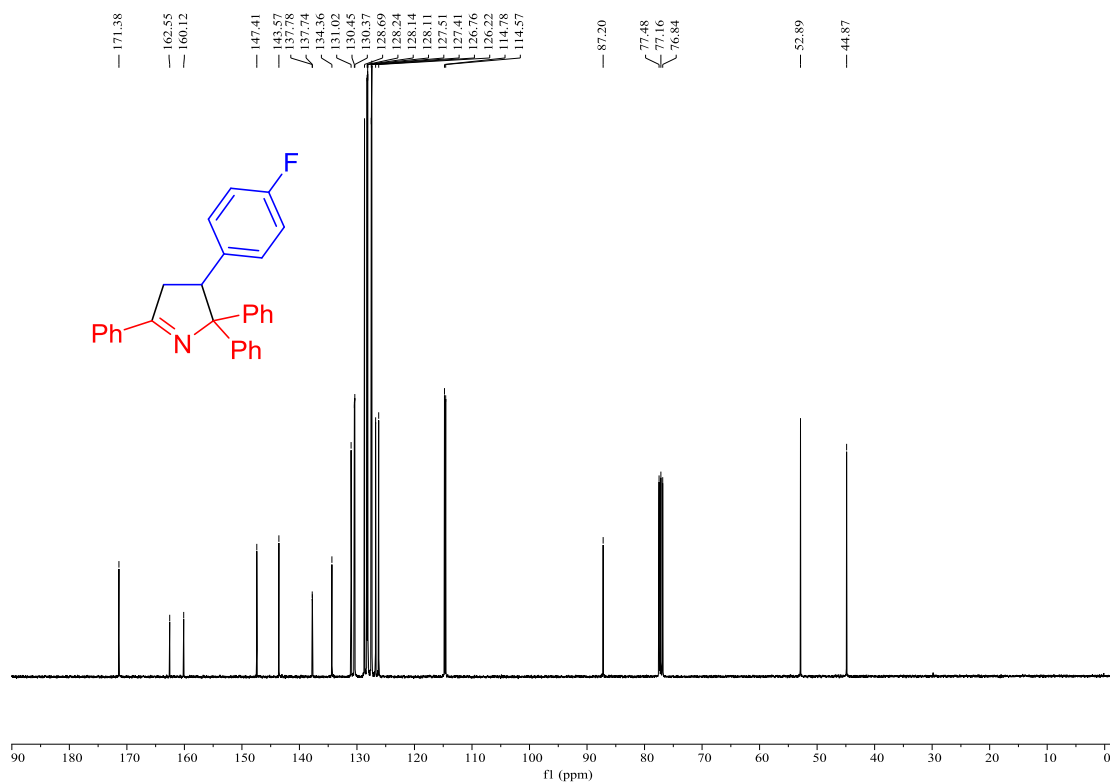

**Figure S16.**  $^{19}\text{F}$  NMR spectra (376 MHz, Chloroform-*d*) of 3-(4-fluorophenyl)-2,2,5-triphenyl-3,4-dihydro-2*H*-pyrrole (3ga).

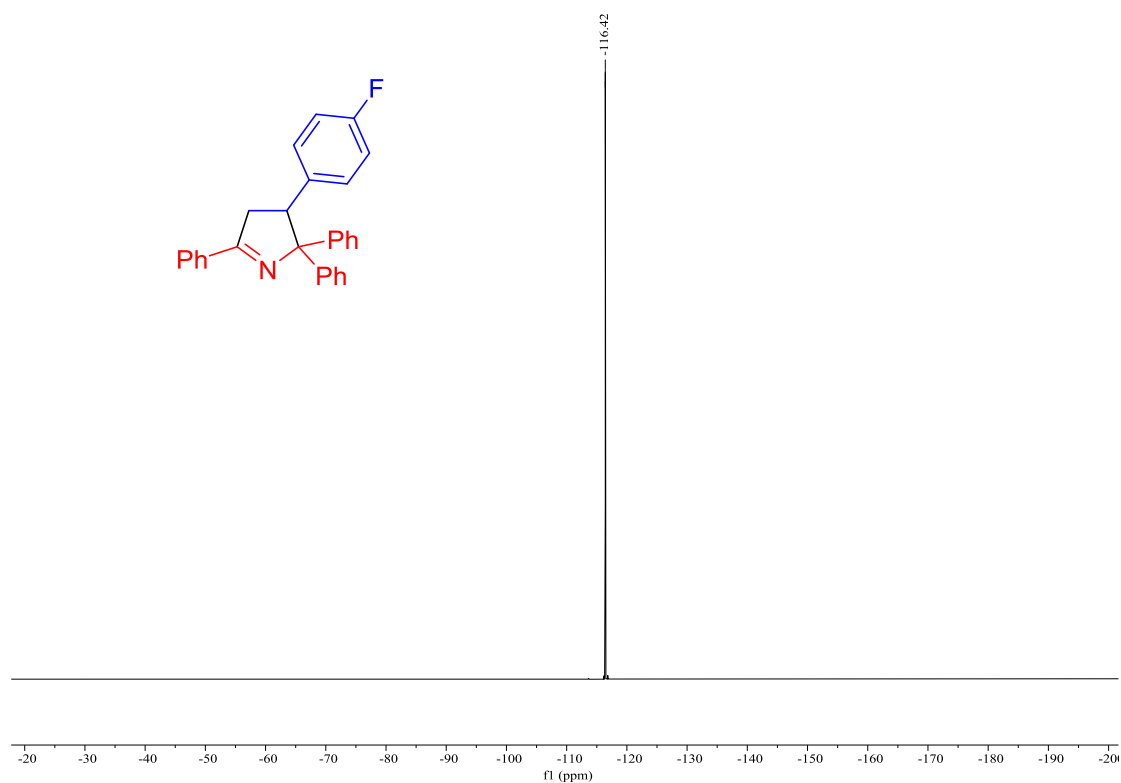

**Figure S17.**  $^1\text{H}$  NMR spectra (600 MHz, Chloroform-*d*) of 3-(4-chlorophenyl)-2,2,5-triphenyl-3,4-dihydro-2*H*-pyrrole (3ha).

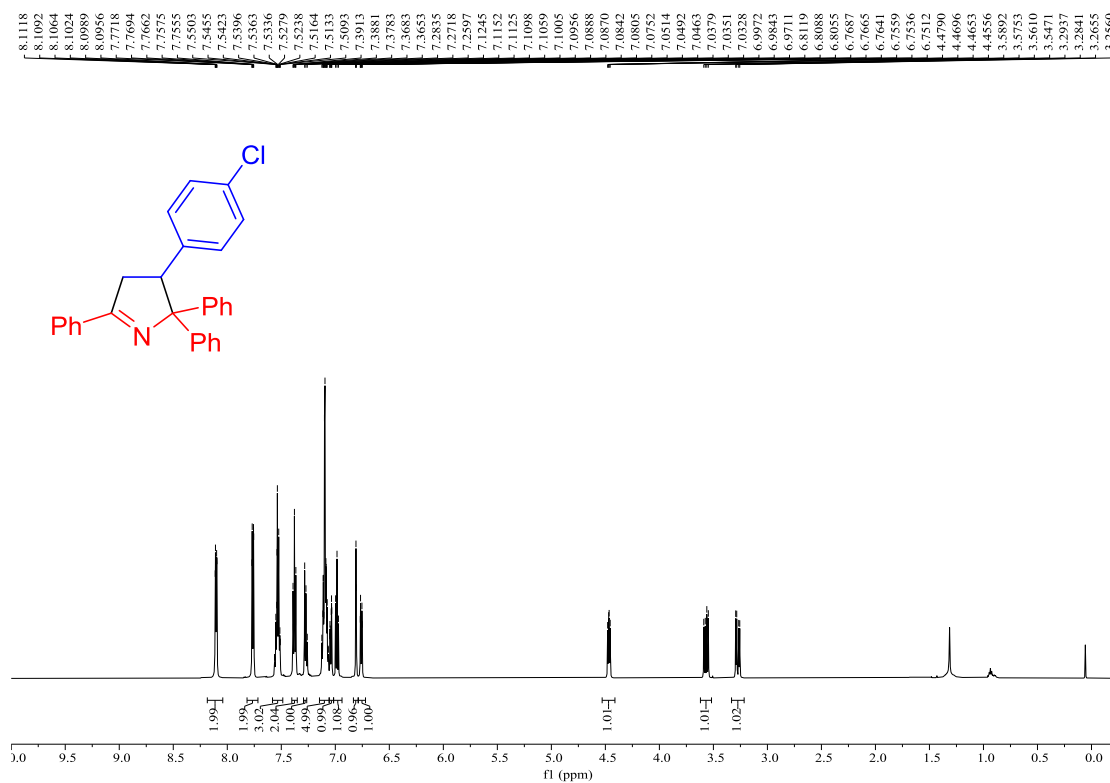

**Figure S18.**  $^{13}\text{C}\{^1\text{H}\}$  NMR spectra (150 MHz, Chloroform-*d*) of 3-(4-chlorophenyl)-2,2,5-triphenyl-3,4-dihydro-2*H*-pyrrole (3ha).

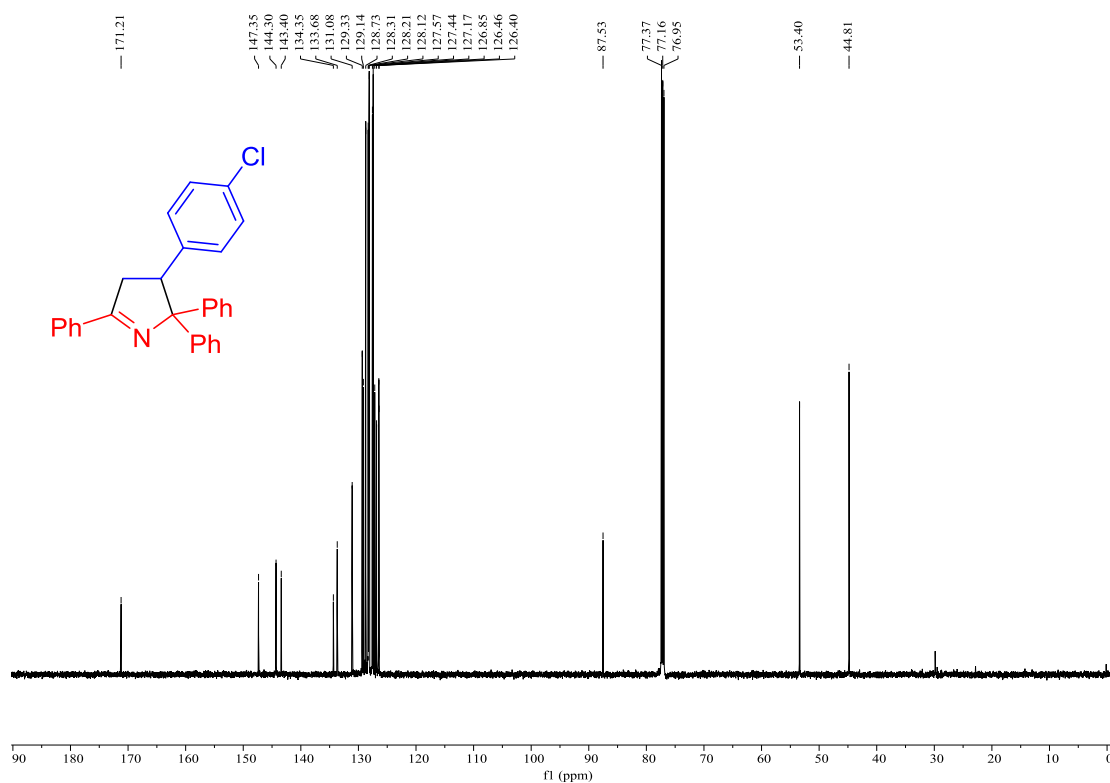

Figure S19.  $^1\text{H}$  NMR spectra (600 MHz, Chloroform-*d*) of 3-(4-bromophenyl)-2,2,5-triphenyl-3,4-dihydro-2*H*-pyrrole (3ia).

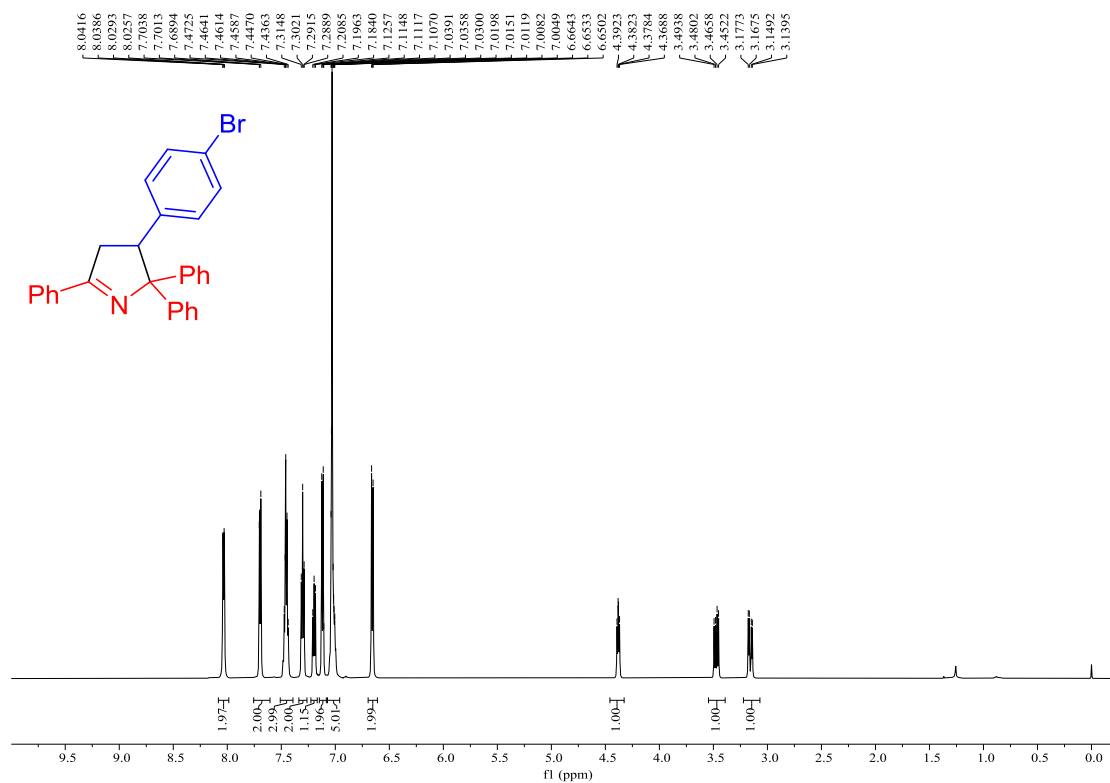

Figure S20.  $^{13}\text{C}\{^1\text{H}\}$  NMR spectra (150 MHz, Chloroform-*d*) of 3-(4-bromophenyl)-2,2,5-triphenyl-3,4-dihydro-2*H*-pyrrole (3ia).

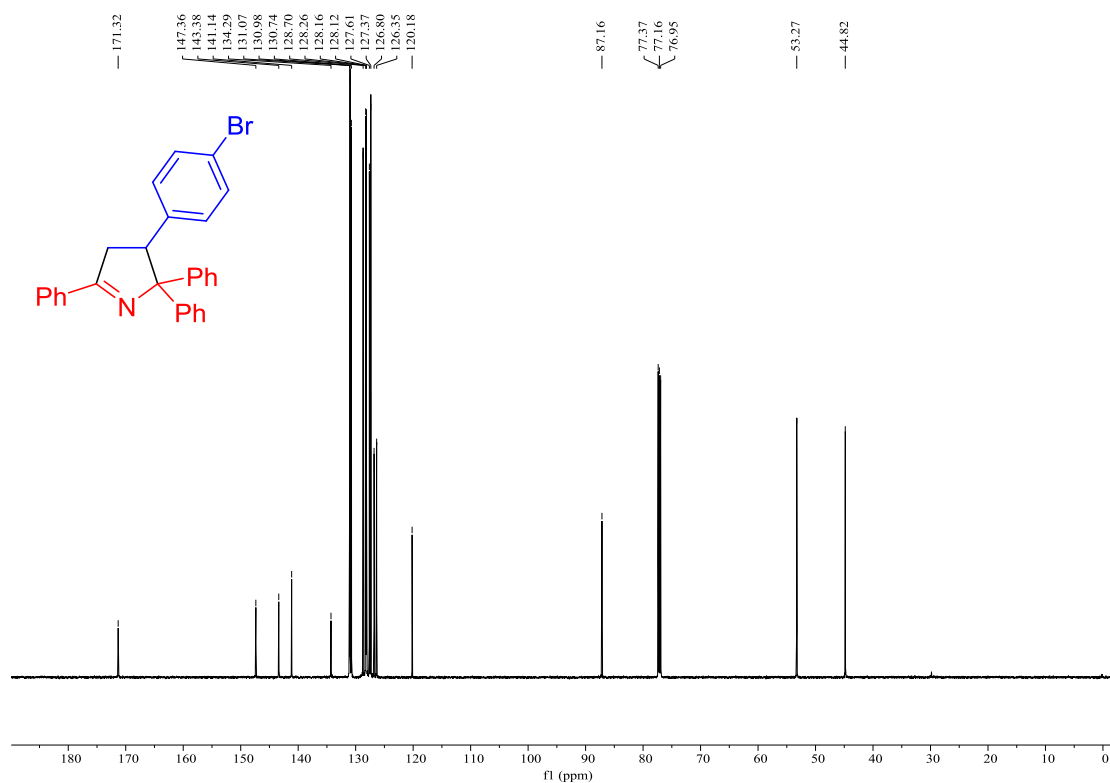

**Figure S21.**  $^1\text{H}$  NMR spectra (600 MHz, Chloroform-*d*) of 3-(naphthalen-2-yl)-2,2,5-triphenyl-3,4-dihydro-2*H*-pyrrole (3ja).

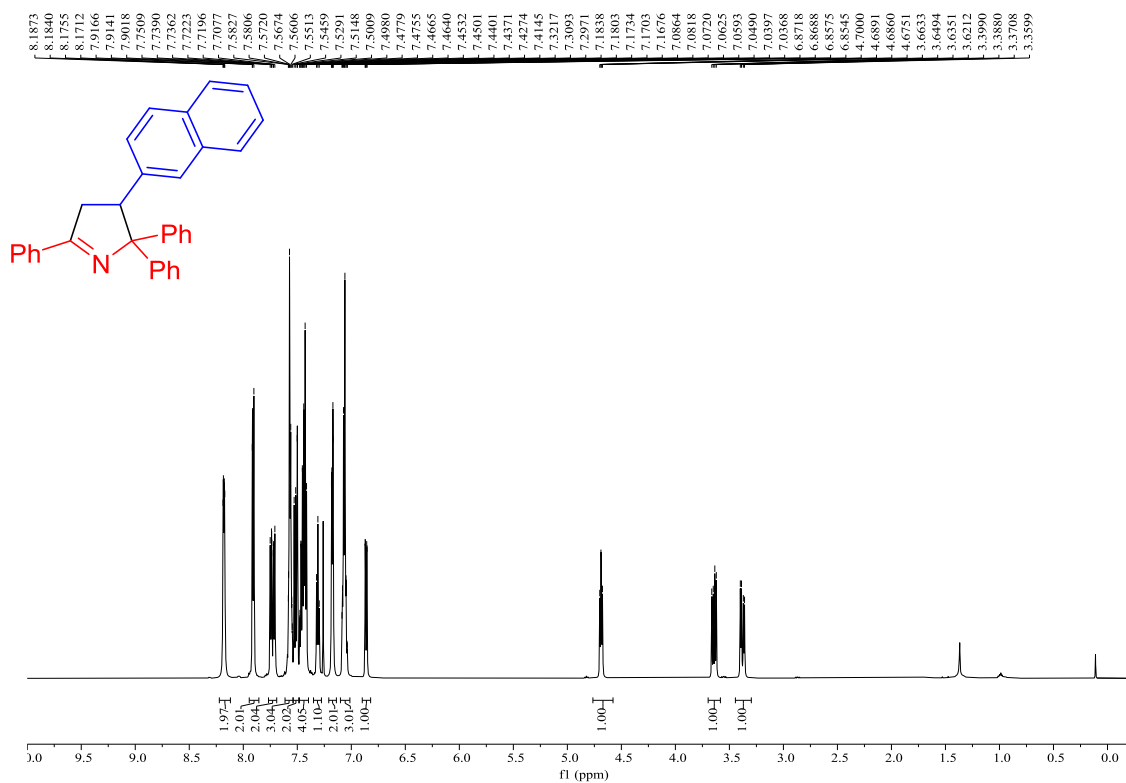

**Figure S22.**  $^{13}\text{C}\{^1\text{H}\}$  NMR spectra (150 MHz, Chloroform-*d*) of 3-(naphthalen-2-yl)-2,2,5-triphenyl-3,4-dihydro-2*H*-pyrrole (3ja).

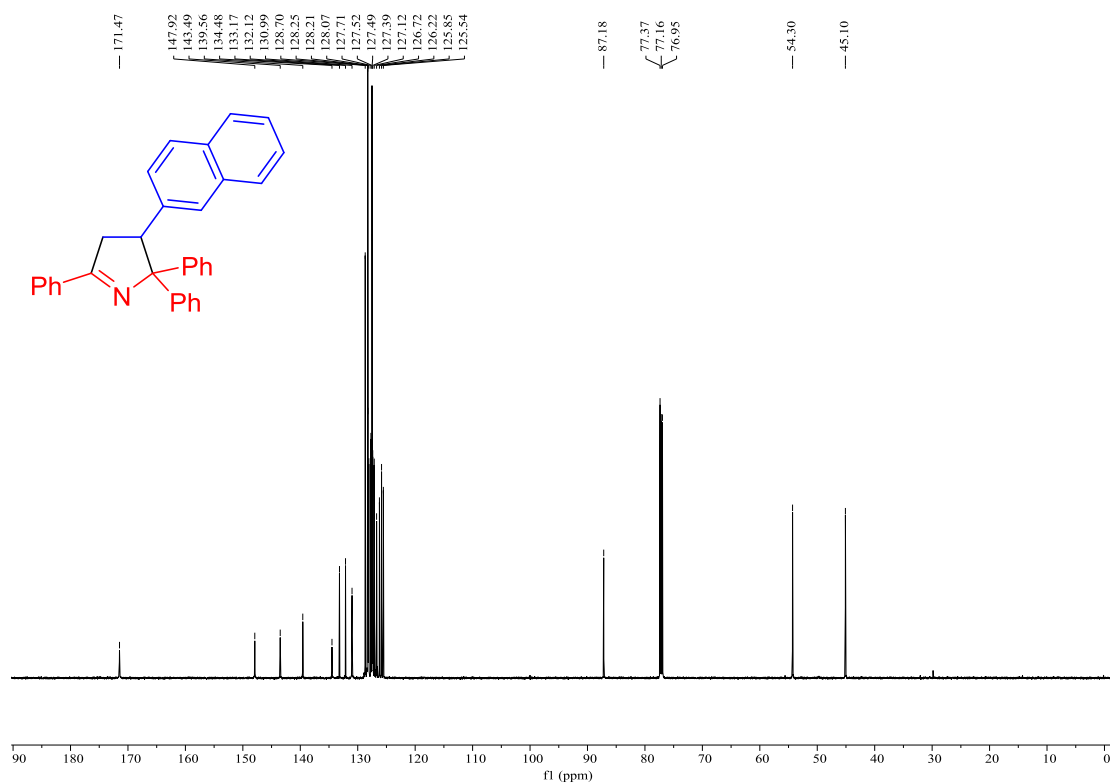

**Figure S23.**  $^1\text{H}$  NMR spectra (400 MHz, Chloroform-*d*) of 3-(4,4-dimethylthiochroman-6-yl)-2,2,5-triphenyl-3,4-dihydro-2*H*-pyrrole (3ka).

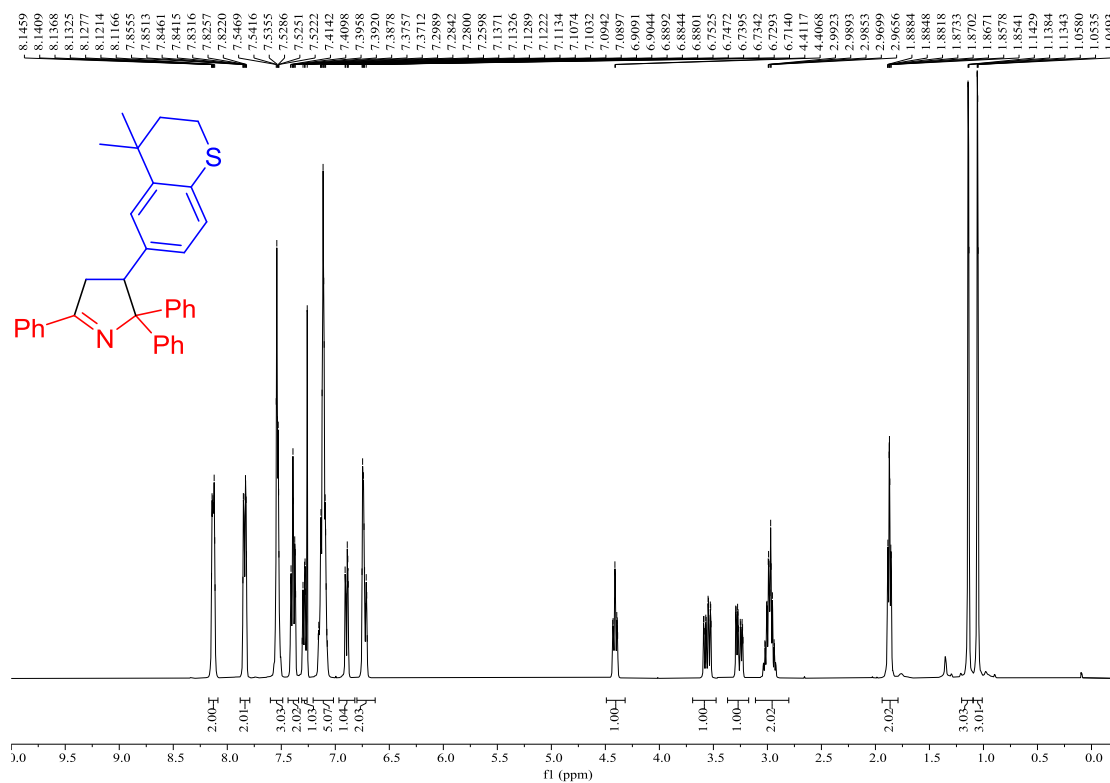

**Figure S24.**  $^{13}\text{C}\{^1\text{H}\}$  NMR spectra (100 MHz, Chloroform-*d*) of 3-(4,4-dimethylthiochroman-6-yl)-2,2,5-triphenyl-3,4-dihydro-2*H*-pyrrole (3ka).

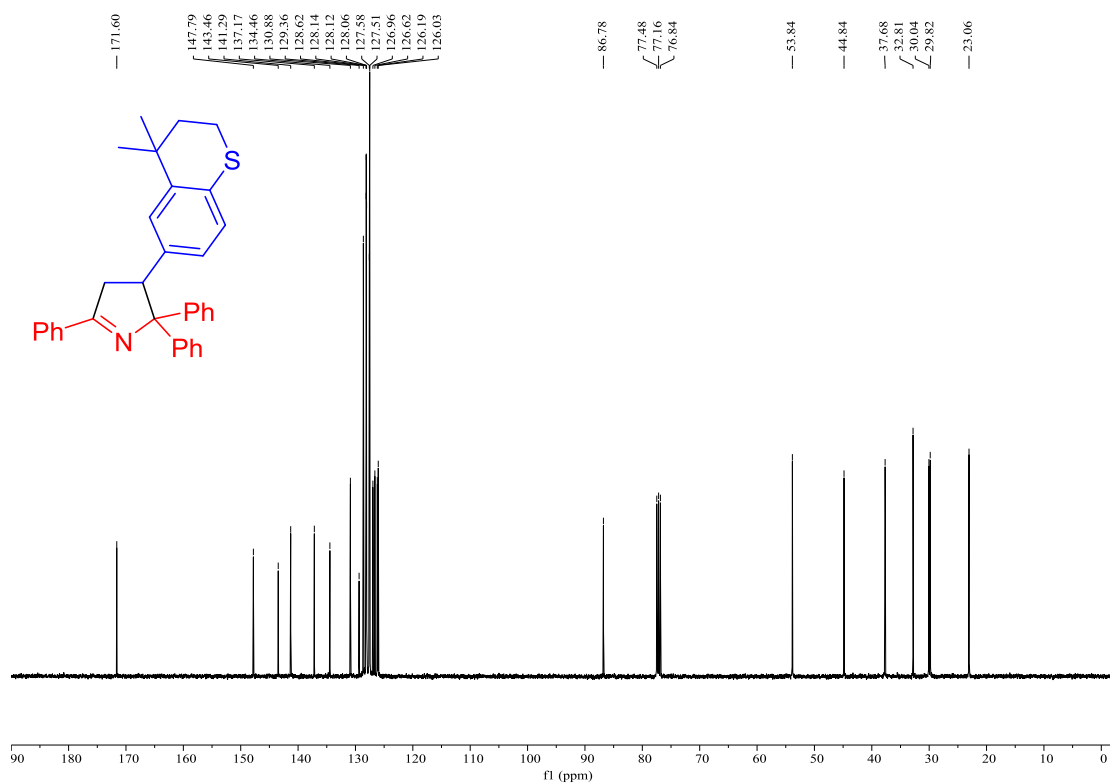



**Figure S25.**  $^1\text{H}$  NMR spectra (400 MHz, Chloroform-*d*) of 3-(4,4-dimethylthiochroman-6-yl)-2,2,5-triphenyl-3,4-dihydro-2*H*-pyrrole (3la).

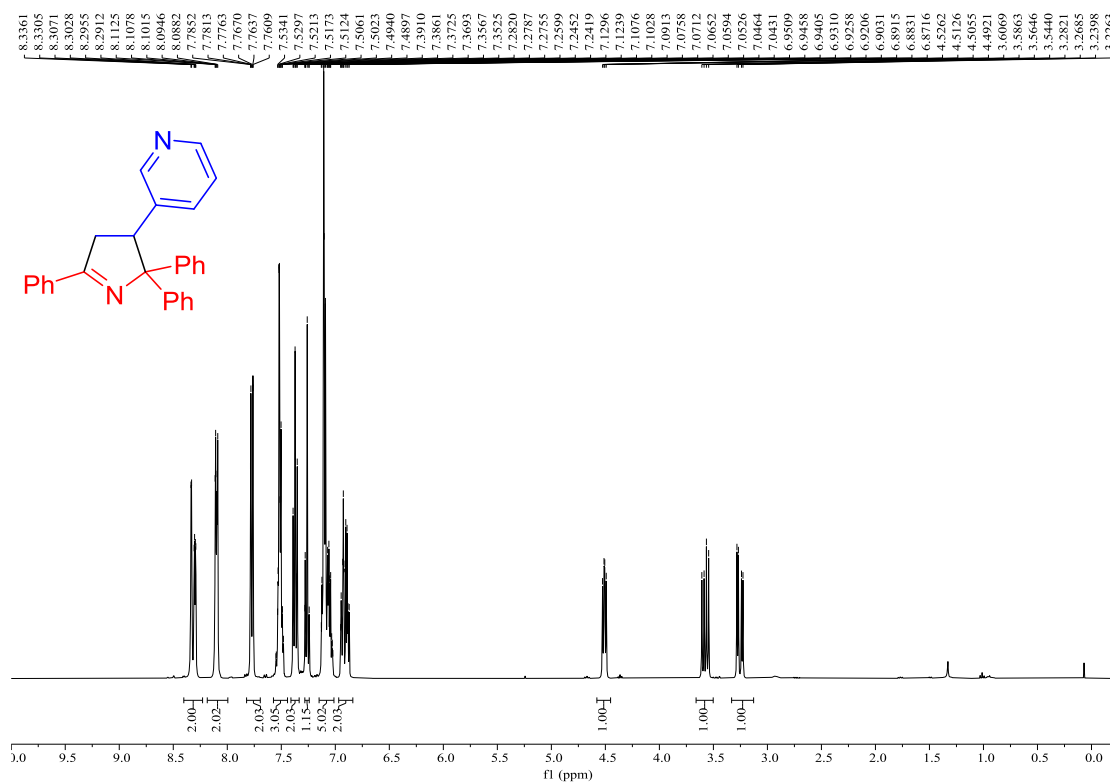

**Figure S26.**  $^{13}\text{C}\{^1\text{H}\}$  NMR spectra (100 MHz, Chloroform-*d*) of 3-(4,4-dimethylthiochroman-6-yl)-2,2,5-triphenyl-3,4-dihydro-2*H*-pyrrole (3la).

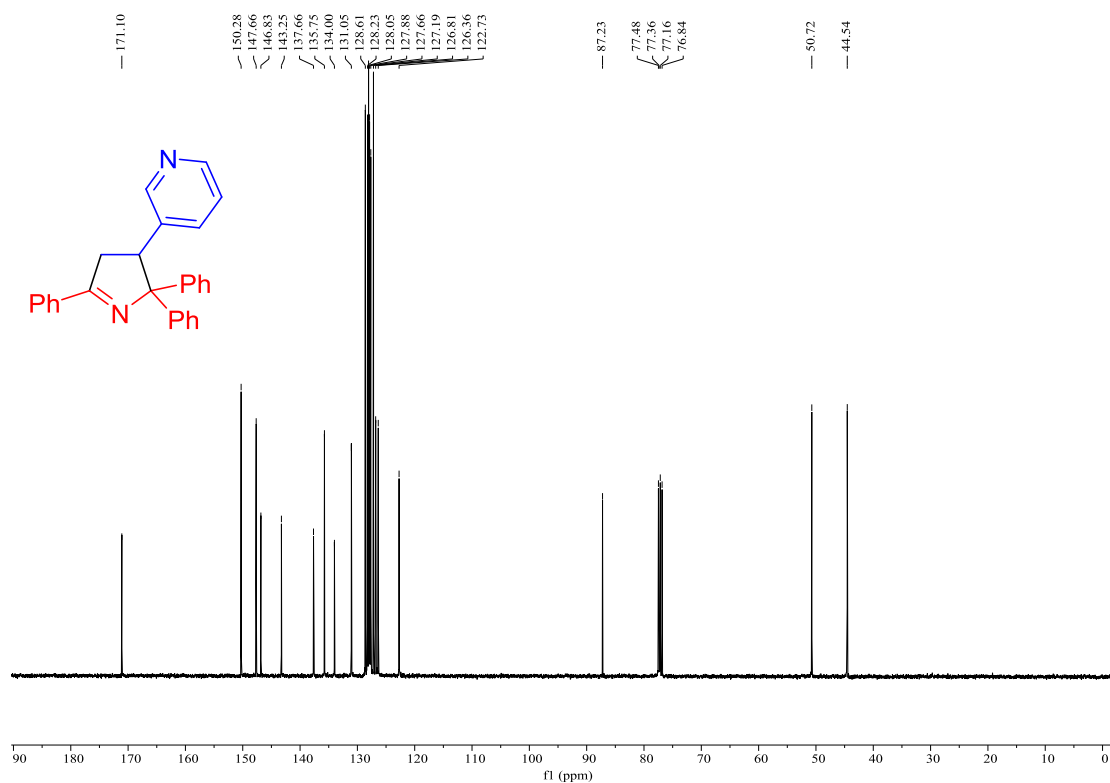

**Figure S27.**  $^1\text{H}$  NMR spectra (600 MHz, Chloroform-*d*) of 3-hexyl-2,2,5-triphenyl-3,4-dihydro-2*H*-pyrrole (3ma).

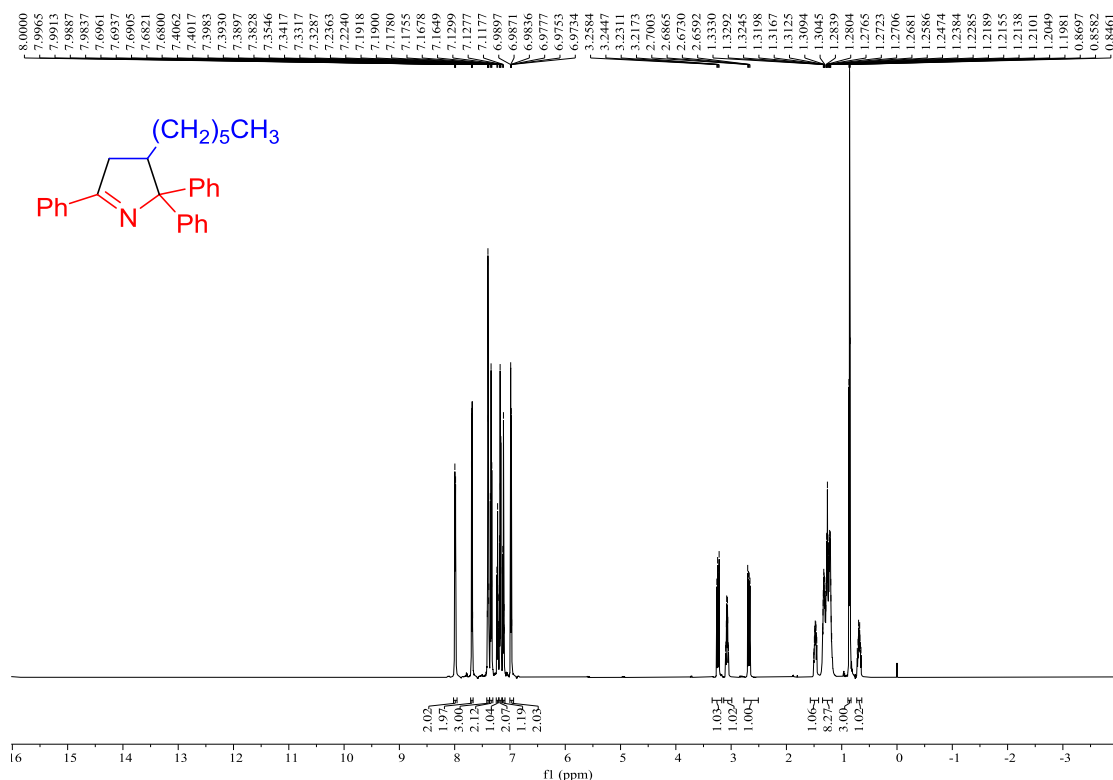

**Figure S28.**  $^{13}\text{C}\{^1\text{H}\}$  NMR spectra (150 MHz, Chloroform-*d*) of 3-hexyl-2,2,5-triphenyl-3,4-dihydro-2*H*-pyrrole (3ma).

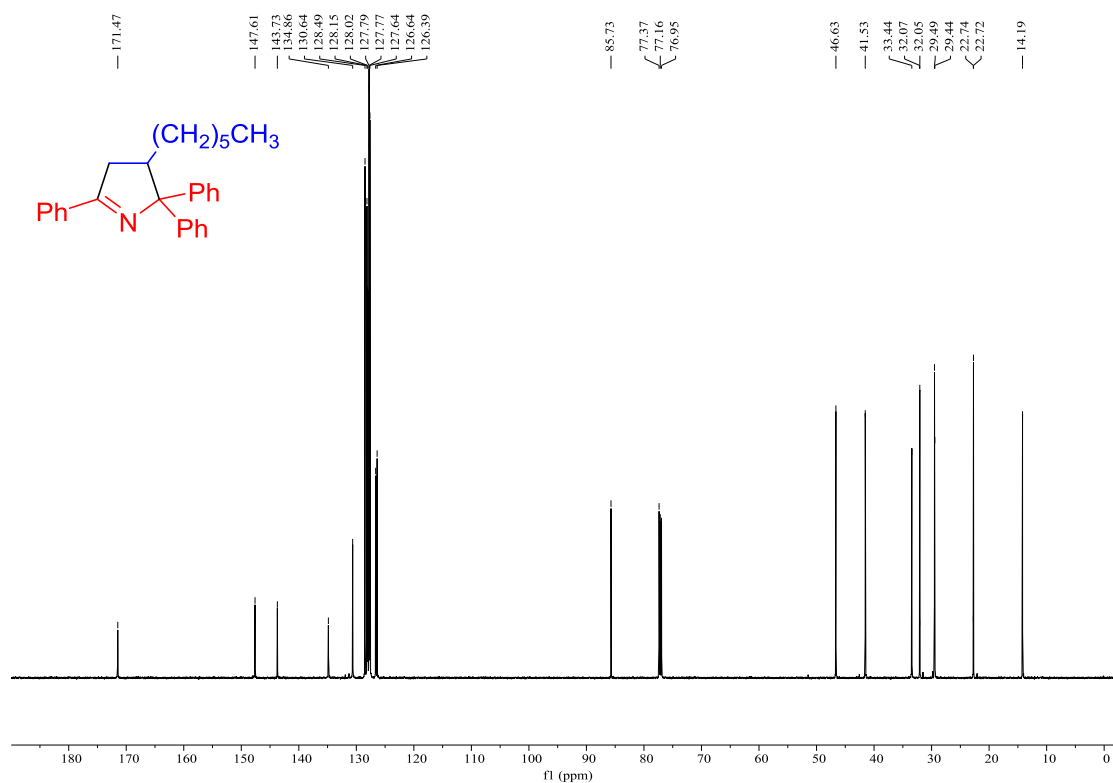

**Figure S29.**  $^1\text{H}$  NMR spectra (400 MHz, Chloroform-*d*) of 3-cyclopentyl-2,2,5-triphenyl-3,4-dihydro-2*H*-pyrrole (3na).

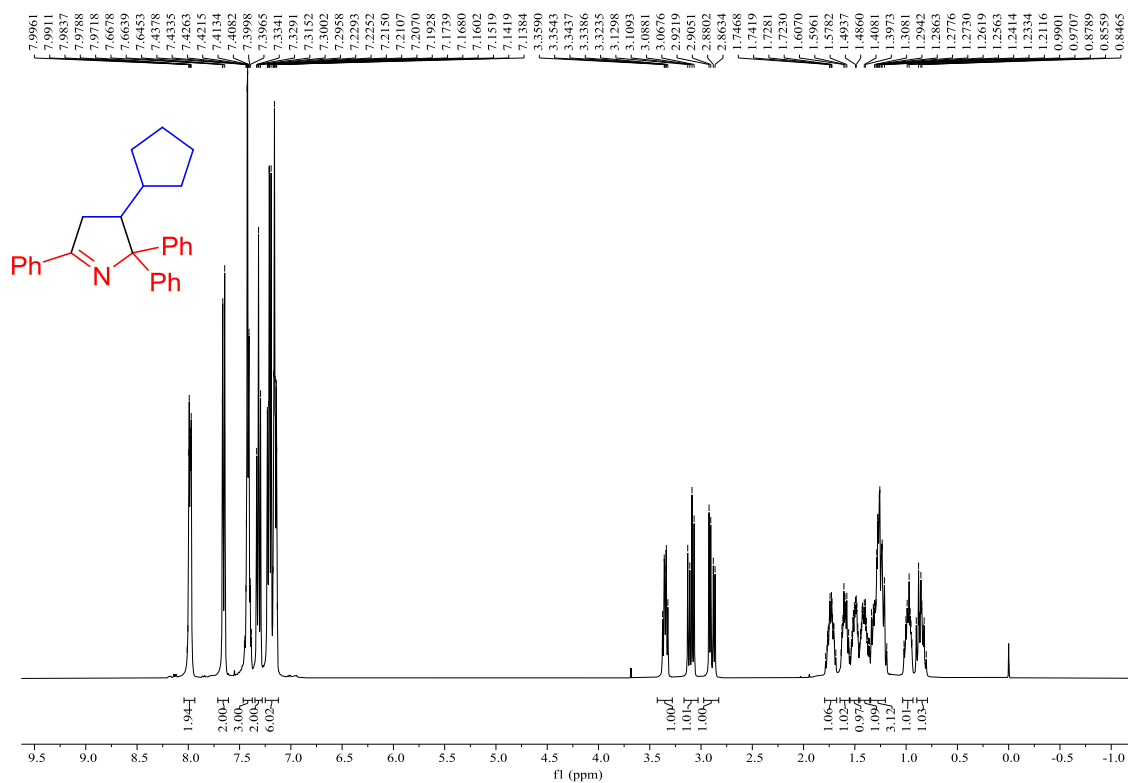

**Figure S30.**  $^{13}\text{C}\{^1\text{H}\}$  NMR spectra (100 MHz, Chloroform-*d*) of 3-cyclopentyl-2,2,5-triphenyl-3,4-dihydro-2*H*-pyrrole (3na).

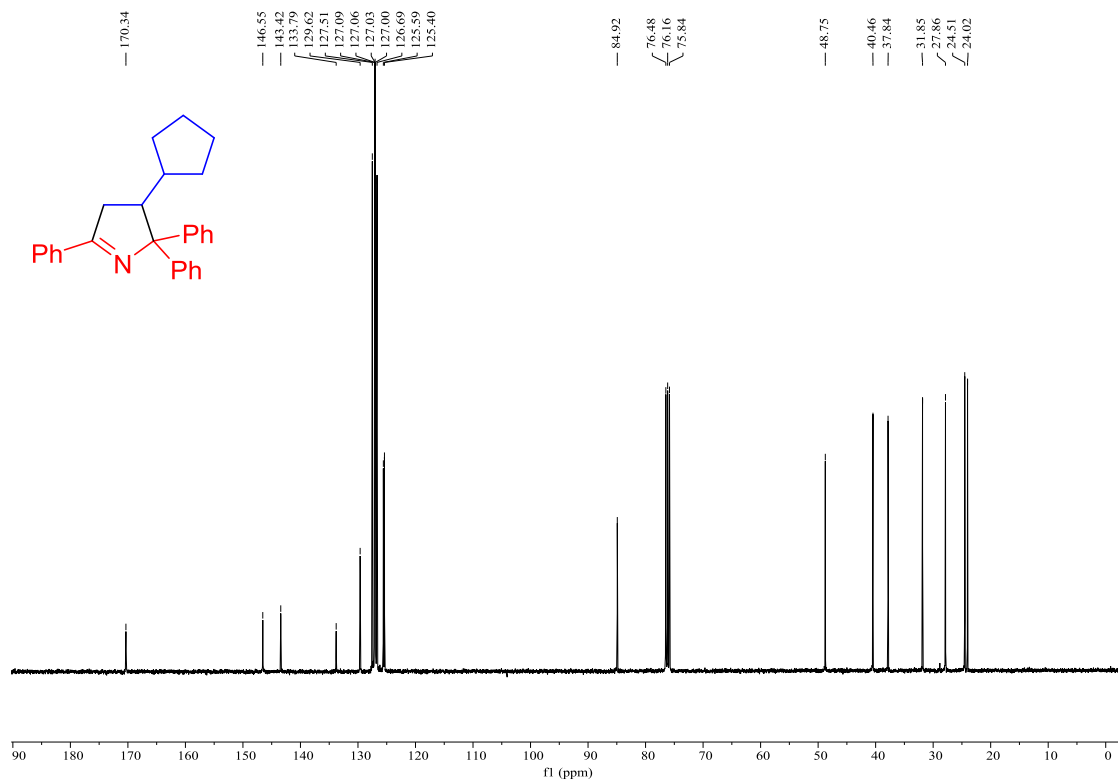

**Figure S31.**  $^1\text{H}$  NMR spectra (400 MHz, Chloroform-*d*) of 3-cyclohexyl-2,2,5-triphenyl-3,4-dihydro-2*H*-pyrrole (30a).

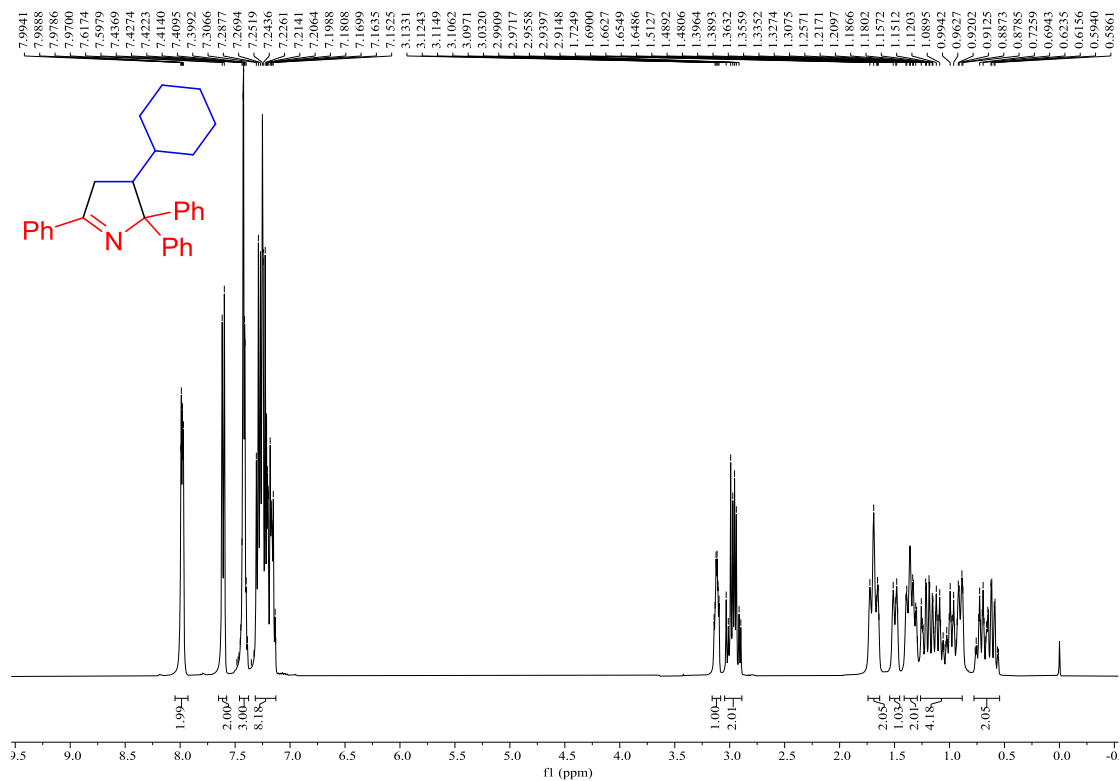

**Figure S32.**  $^{13}\text{C}\{^1\text{H}\}$  NMR spectra (100 MHz, Chloroform-*d*) of 3-cyclohexyl-2,2,5-triphenyl-3,4-dihydro-2*H*-pyrrole (30a).

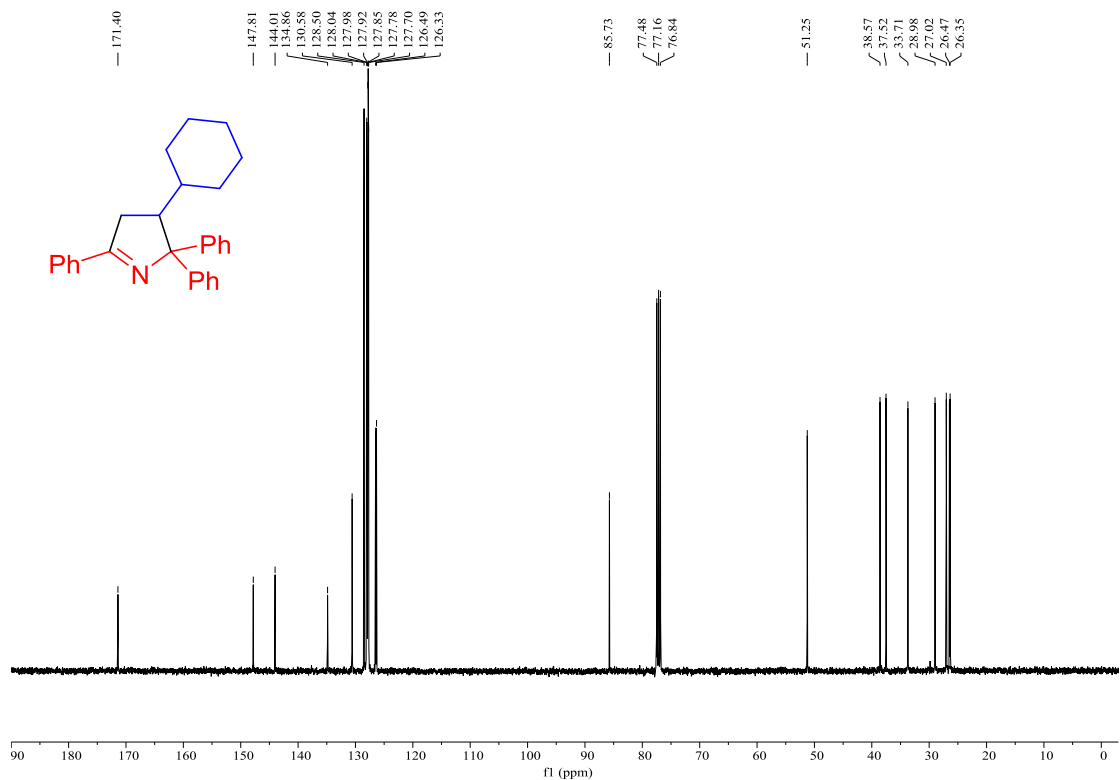

**Figure S33.**  $^1\text{H}$  NMR spectra (400 MHz, Chloroform-*d*) of 2,2,3-triphenyl-5-(*m*-tolyl)-3,4-dihydro-2*H*-pyrrole (3ab).

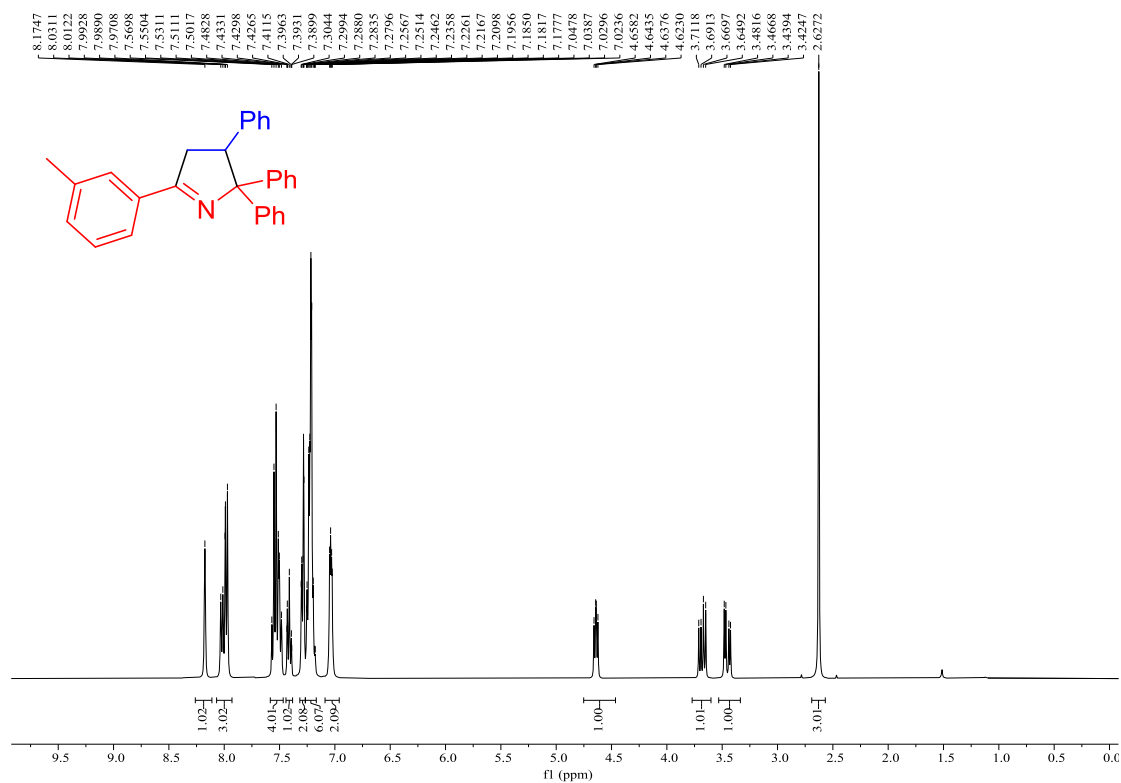

**Figure S34.**  $^{13}\text{C}\{^1\text{H}\}$  NMR spectra (100 MHz, Chloroform-*d*) of 2,2,3-triphenyl-5-(*m*-tolyl)-3,4-dihydro-2*H*-pyrrole (3ab).

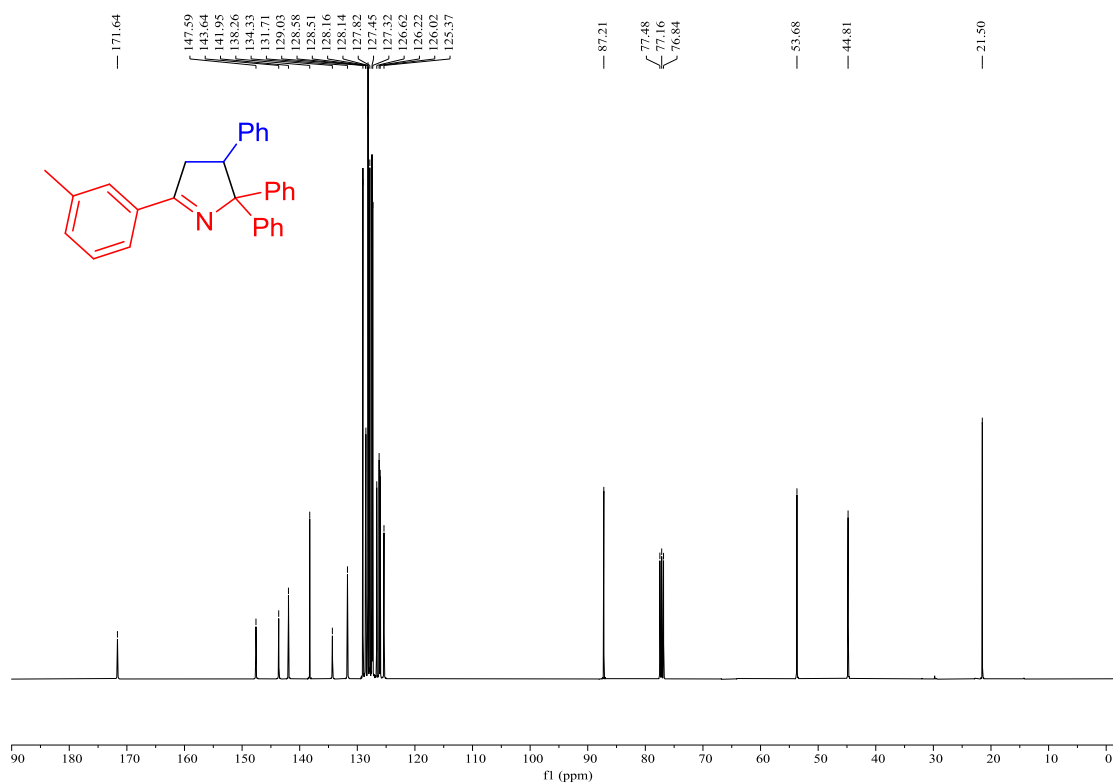

**Figure S35.**  $^1\text{H}$  NMR spectra (400 MHz, Chloroform-*d*) of 5-(4-methoxyphenyl)-2,2,3-triphenyl-3,4-dihydro-2*H*-pyrrole (3ac).

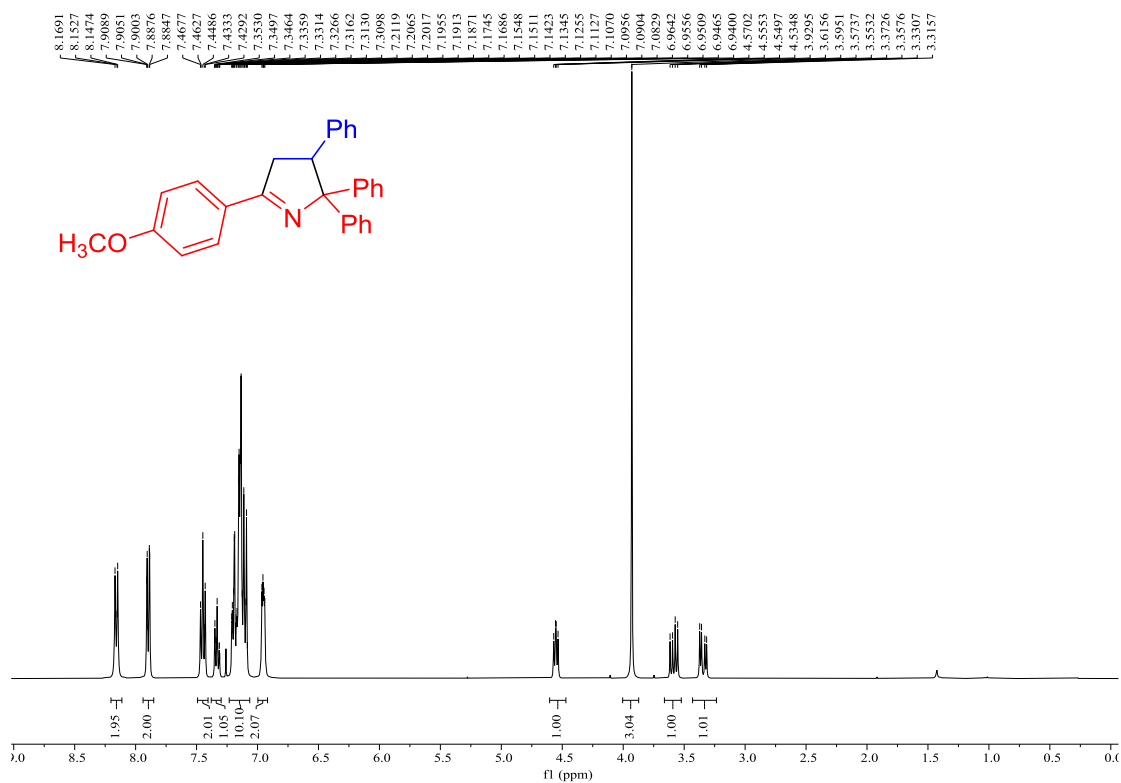

**Figure S36.**  $^{13}\text{C}\{^1\text{H}\}$  NMR spectra (100 MHz, Chloroform-*d*) of 5-(4-methoxyphenyl)-2,2,3-triphenyl-3,4-dihydro-2*H*-pyrrole (3ac).

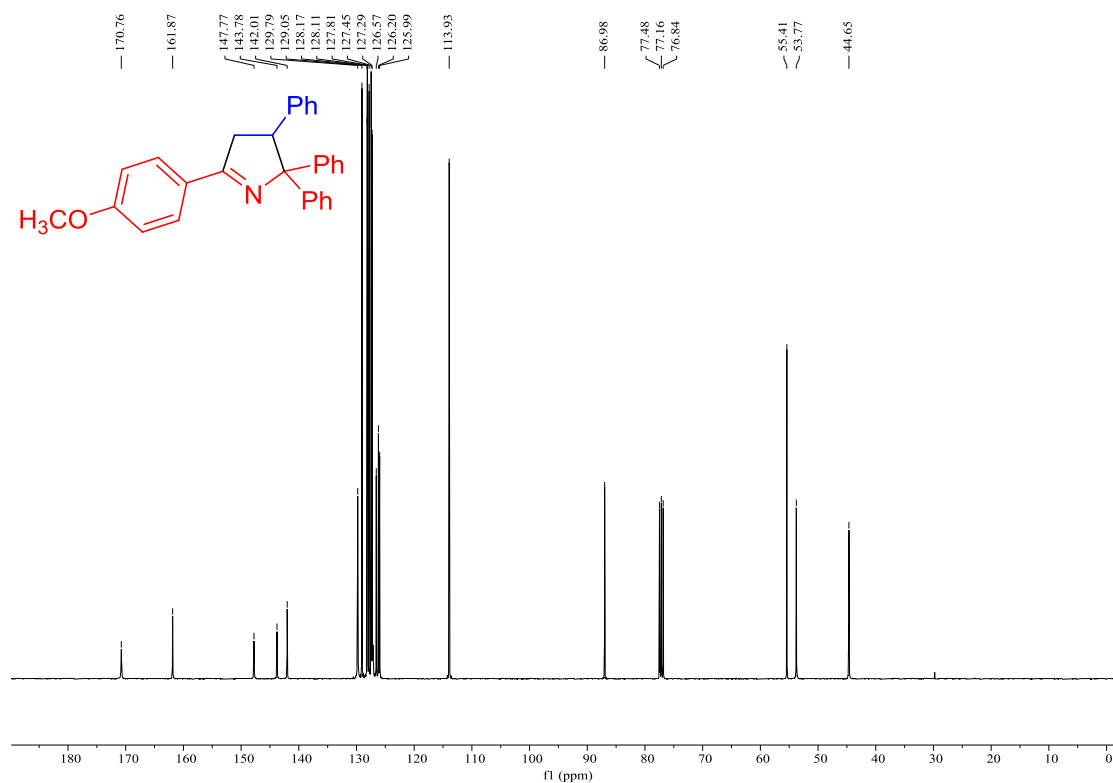

**Figure S37.**  $^1\text{H}$  NMR spectra (400 MHz, Chloroform-*d*) of 5-(benzo[d][1,3]dioxol-5-yl)-2,2,3-triphenyl-3,4-dihydro-2*H*-pyrrole (3ad).

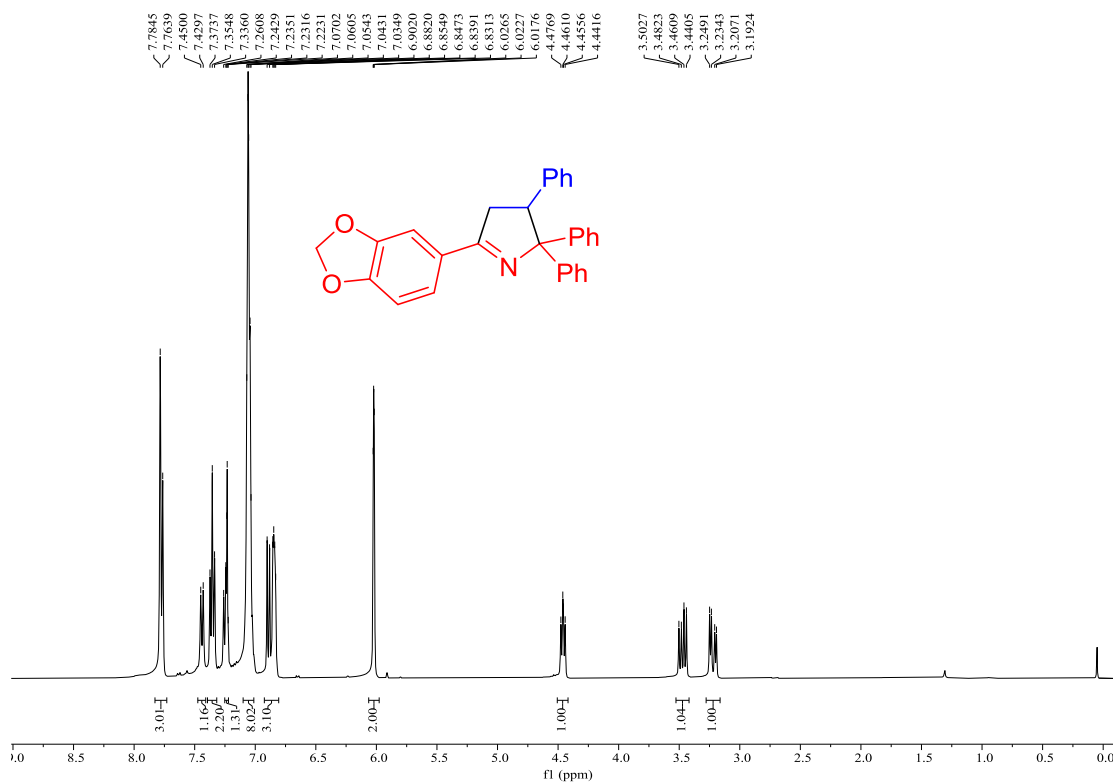

**Figure S38.**  $^{13}\text{C}\{^1\text{H}\}$  NMR spectra (100 MHz, Chloroform-*d*) of 5-(benzo[d][1,3]dioxol-5-yl)-2,2,3-triphenyl-3,4-dihydro-2*H*-pyrrole (3ad).

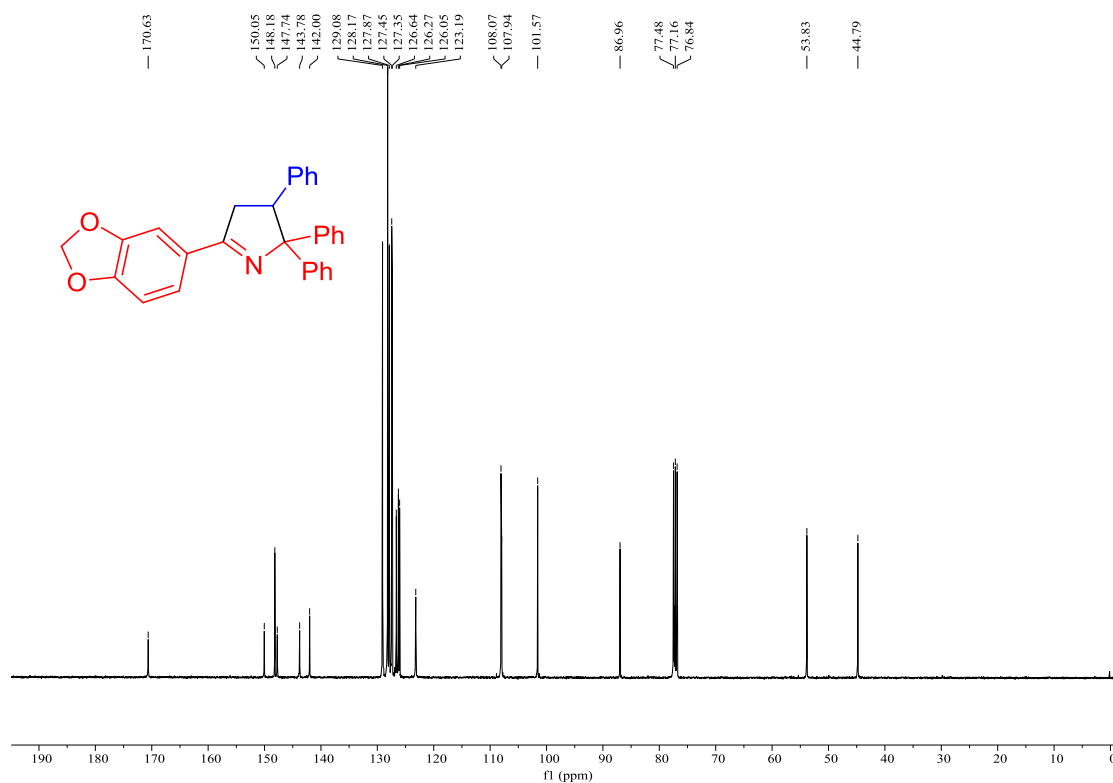

**Figure S39.**  $^1\text{H}$  NMR spectra (400 MHz, Chloroform-*d*) of 5-([1,1'-biphenyl]-4-yl)-2,2,3-triphenyl-3,4-dihydro-2*H*-pyrrole (3ae).

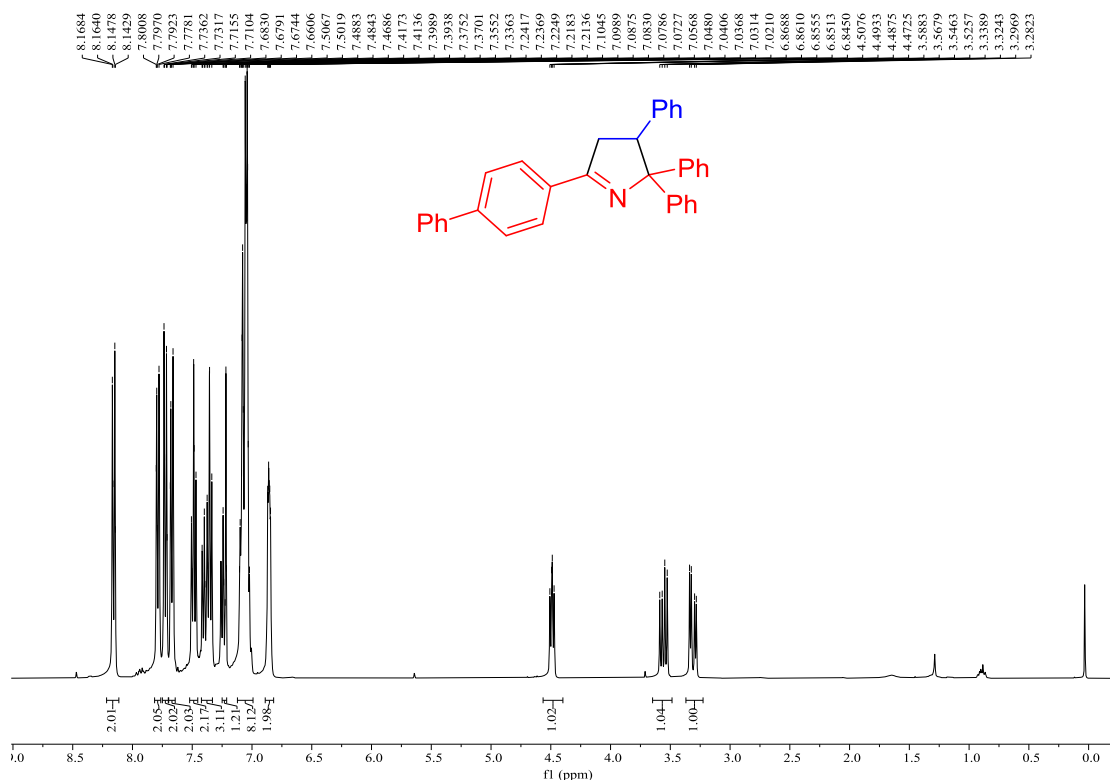

**Figure S40.**  $^{13}\text{C}\{^1\text{H}\}$  NMR spectra (100 MHz, Chloroform-*d*) of 5-([1,1'-biphenyl]-4-yl)-2,2,3-triphenyl-3,4-dihydro-2*H*-pyrrole (3ae).

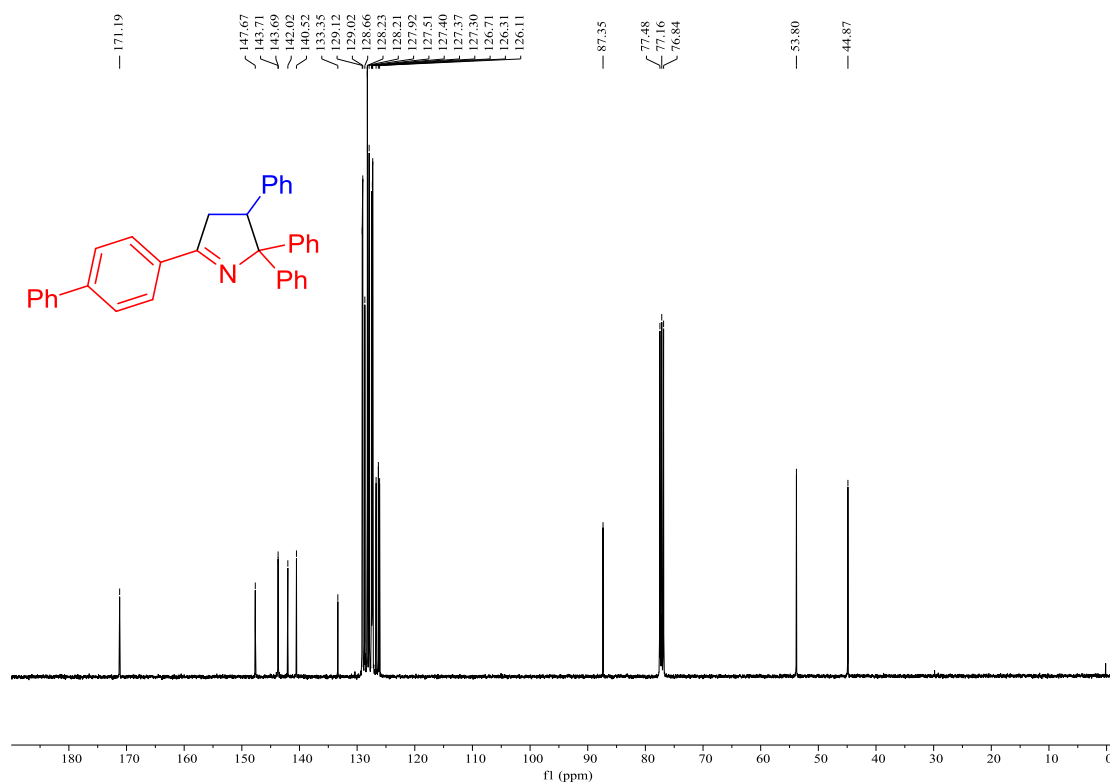



**Figure S41.**  $^1\text{H}$  NMR spectra (400 MHz, Chloroform-*d*) of 3-cyclohexyl-2,2,5-triphenyl-3,4-dihydro-2*H*-pyrrole (3af).

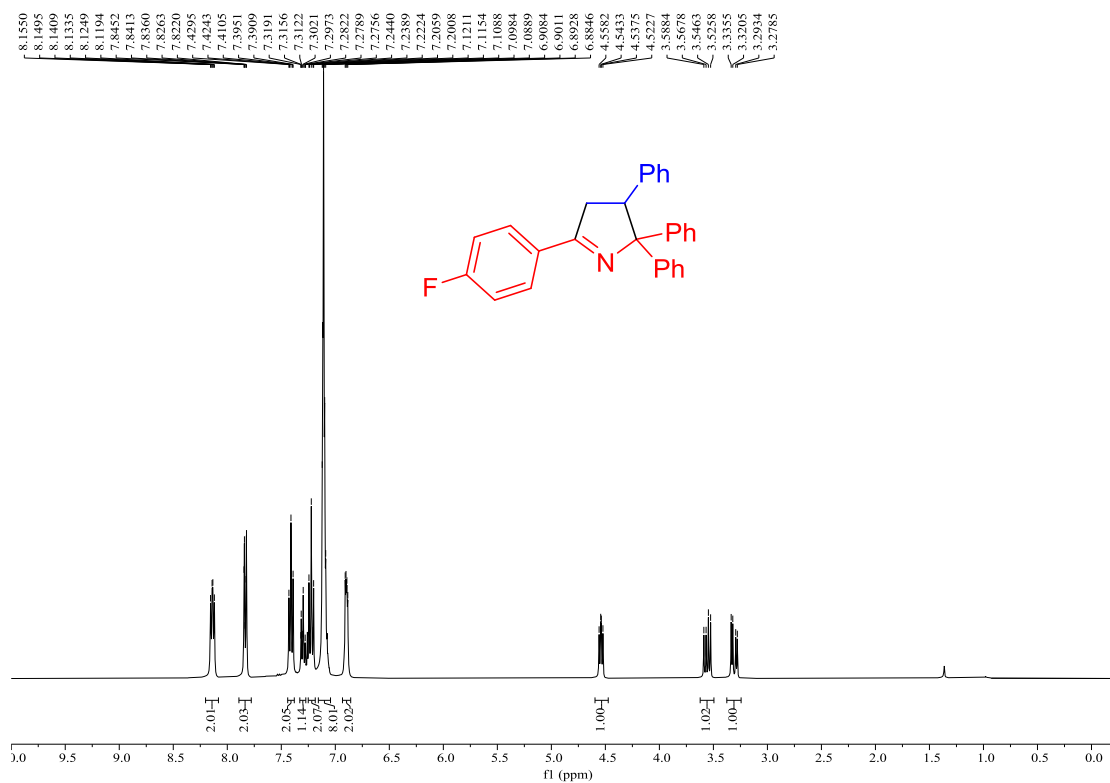

**Figure S42.**  $^{13}\text{C}\{^1\text{H}\}$  NMR spectra (100 MHz, Chloroform-*d*) of 3-cyclohexyl-2,2,5-triphenyl-3,4-dihydro-2*H*-pyrrole (3af).

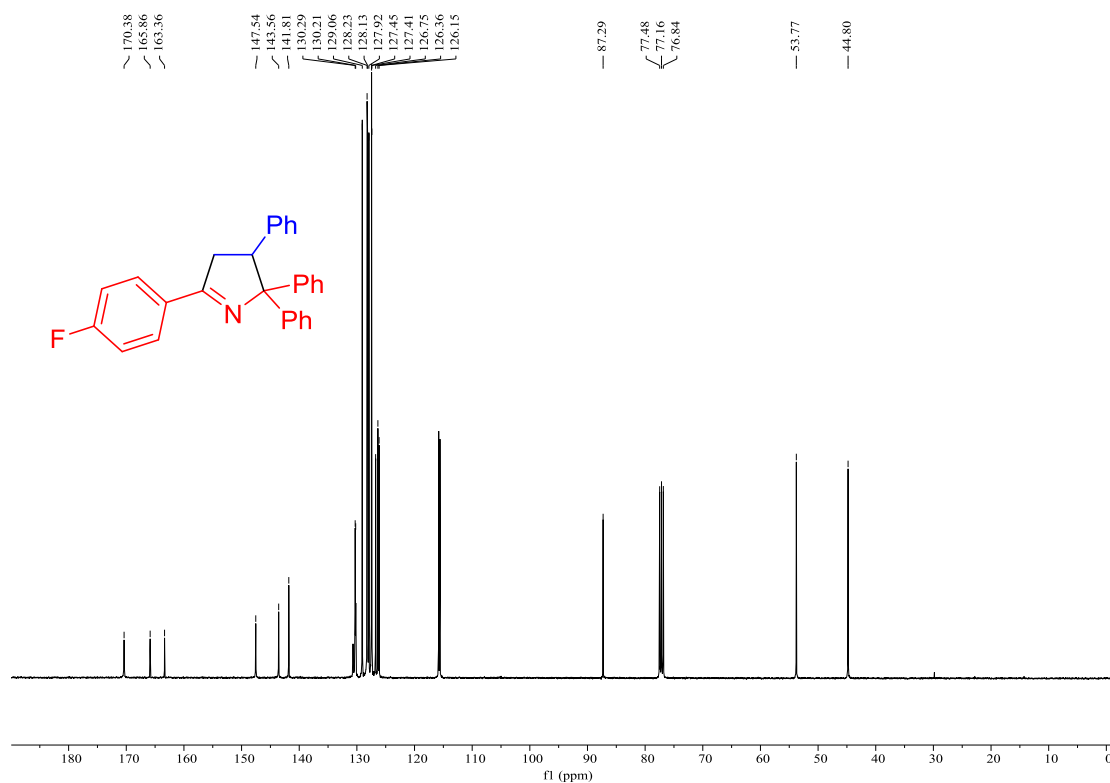

Figure S43.  $^{19}\text{F}$  NMR spectra (376 MHz, Chloroform-*d*) of 3-cyclohexyl-2,2,5-triphenyl-3,4-dihydro-2*H*-pyrrole (3af).

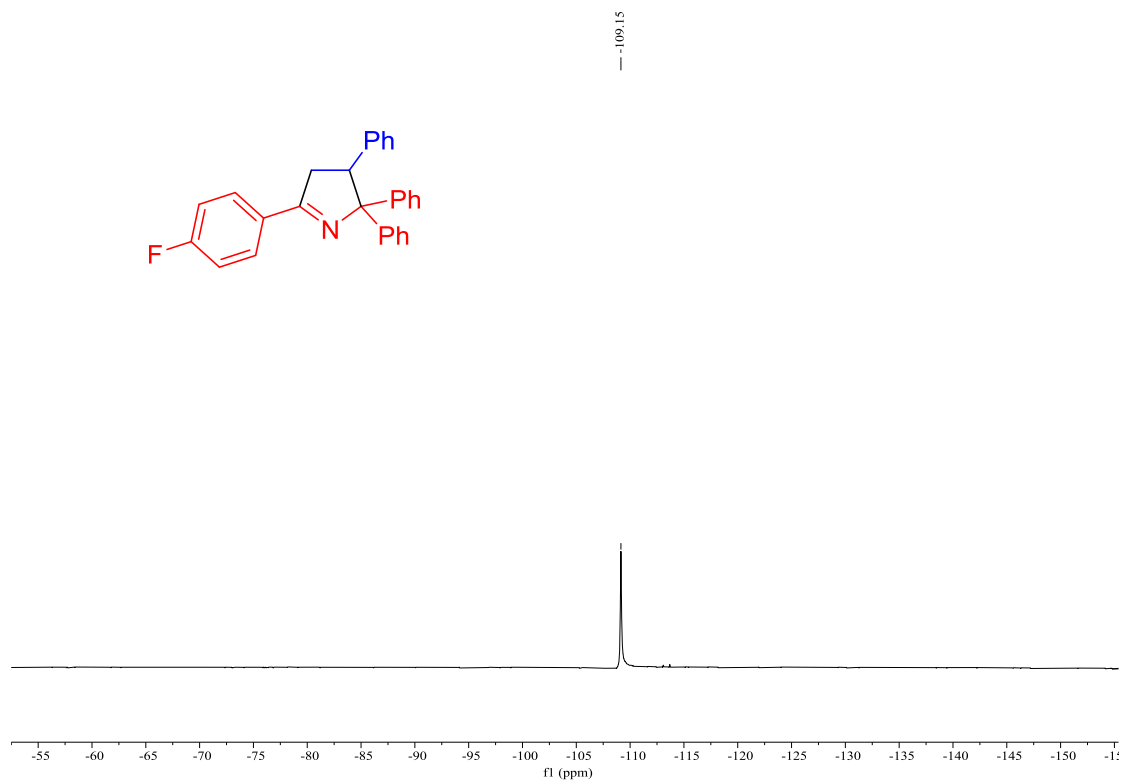

Figure S44.  $^1\text{H}$  NMR spectra (400 MHz, Chloroform-*d*) of 5-(4-chlorophenyl)-2,2,3-triphenyl-3,4-dihydro-2*H*-pyrrole (3ag).

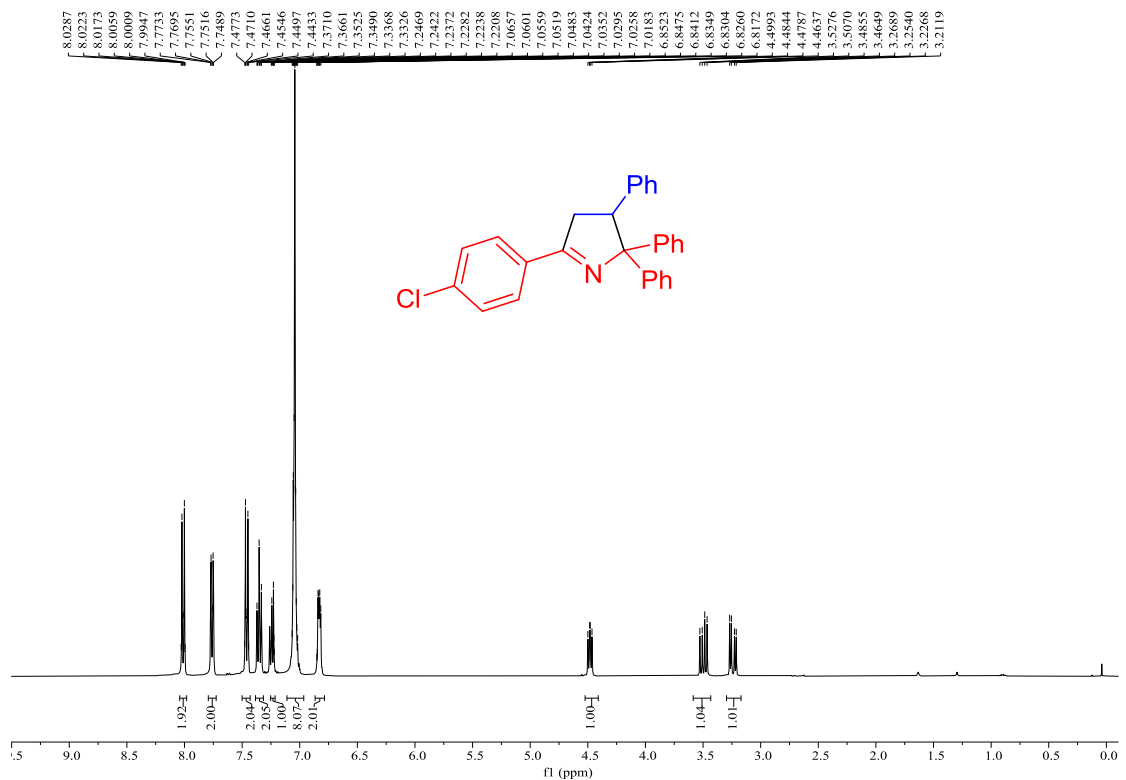

**Figure S45.**  $^{13}\text{C}\{^1\text{H}\}$  NMR spectra (100 MHz, Chloroform-*d*) of 5-(4-chlorophenyl)-2,2,3-triphenyl-3,4-dihydro-2*H*-pyrrole (3ag).

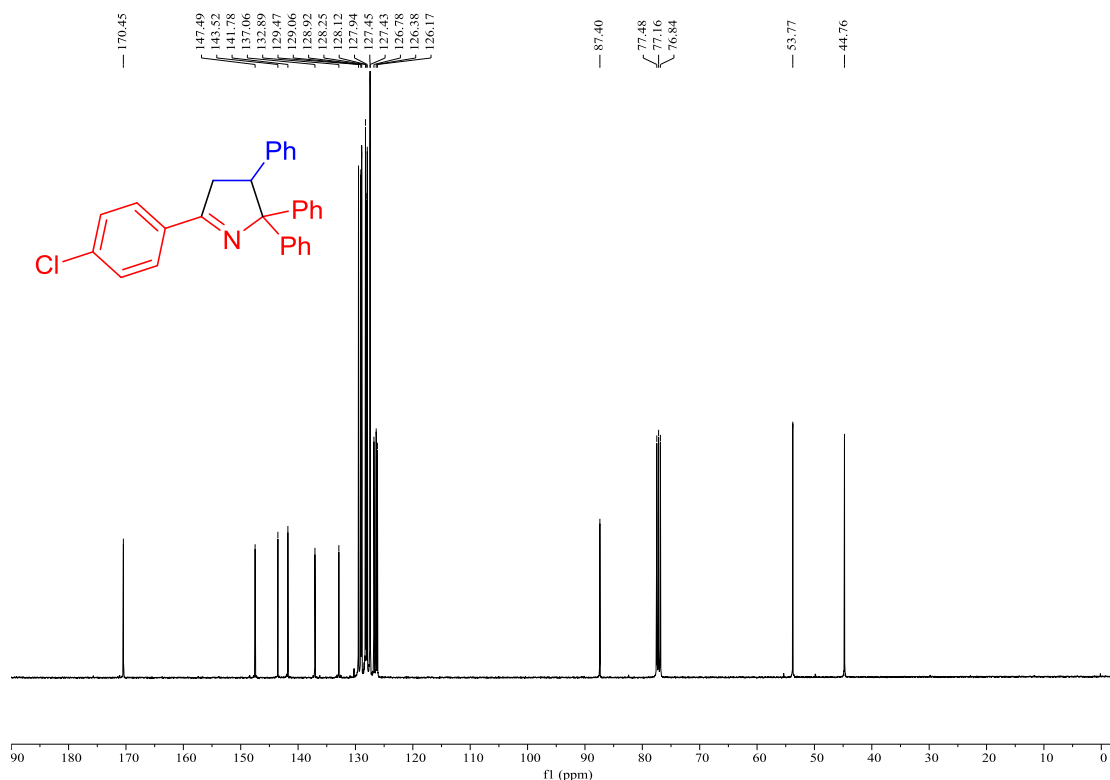

**Figure S46.**  $^1\text{H}$  NMR spectra (400 MHz, Chloroform-*d*) of 2,2,3-triphenyl-5-(*o*-tolyl)-3,4-dihydro-2*H*-pyrrole (3ah).

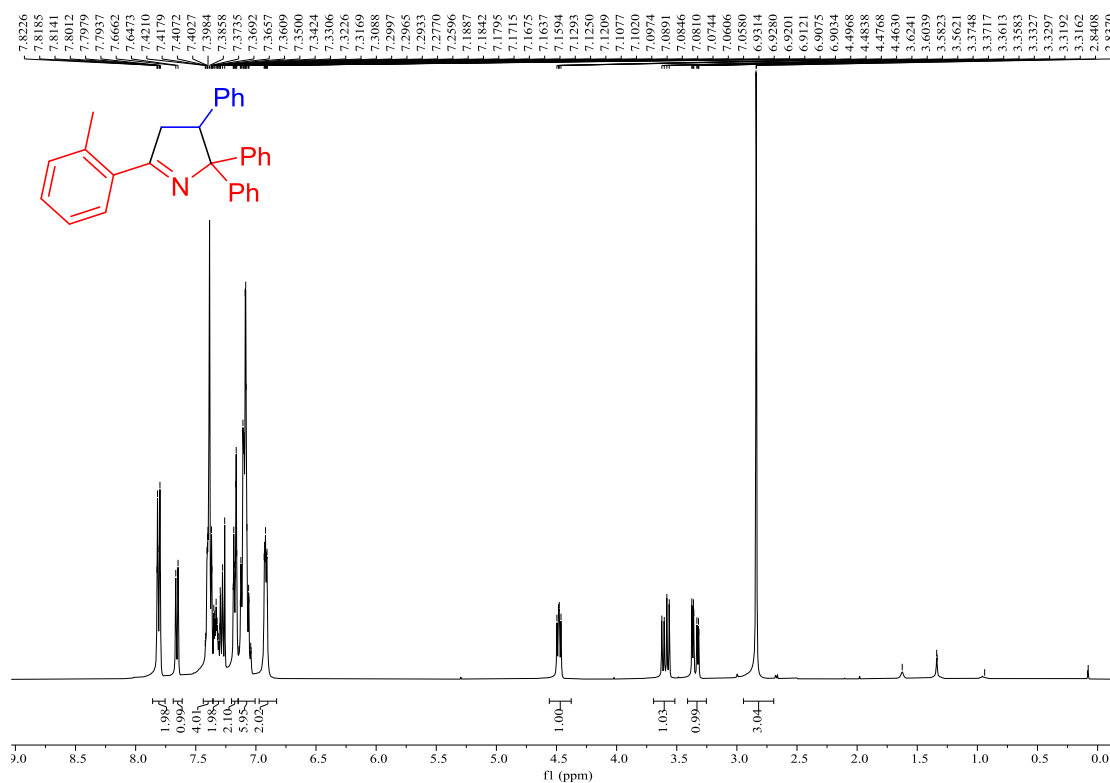

Figure S47.  $^{13}\text{C}\{^1\text{H}\}$  NMR spectra (100 MHz, Chloroform-*d*) of 2,2,3-triphenyl-5-(*o*-tolyl)-3,4-dihydro-2*H*-pyrrole (3ah).

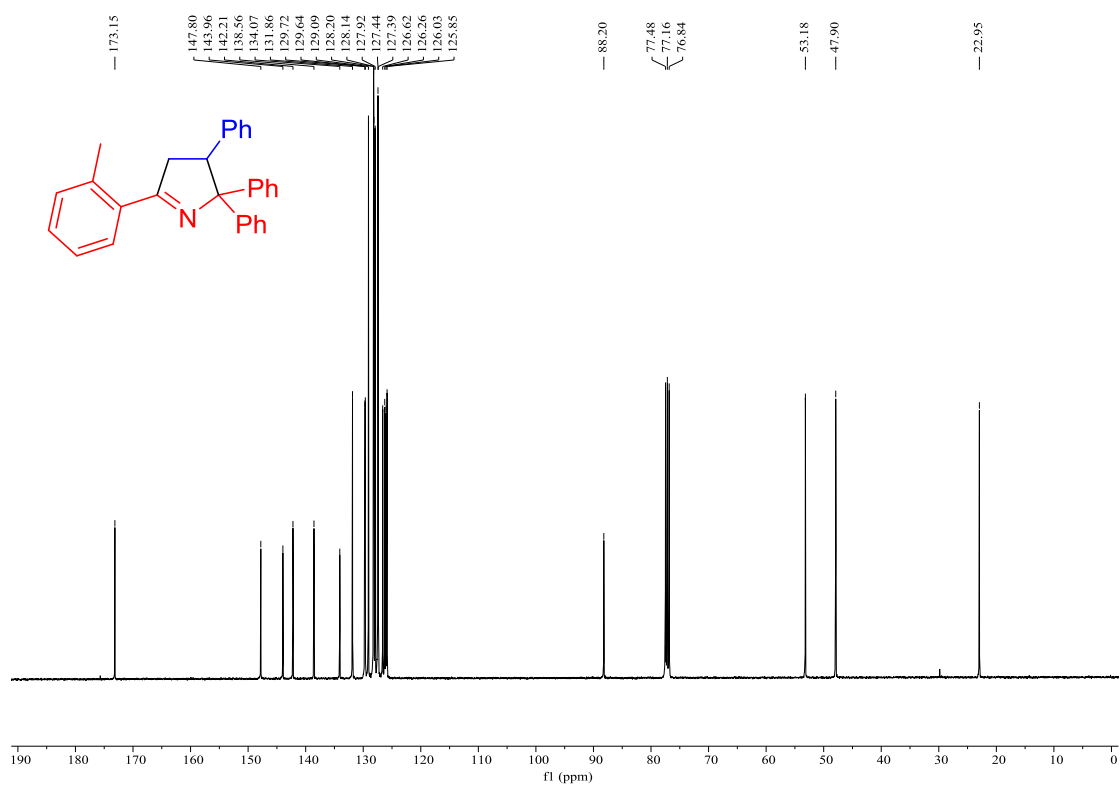

Figure S48.  $^1\text{H}$  NMR spectra (400 MHz, Chloroform-*d*) of 5-(naphthalen-2-yl)-2,2,3-triphenyl-3,4-dihydro-2*H*-pyrrole (3ai).

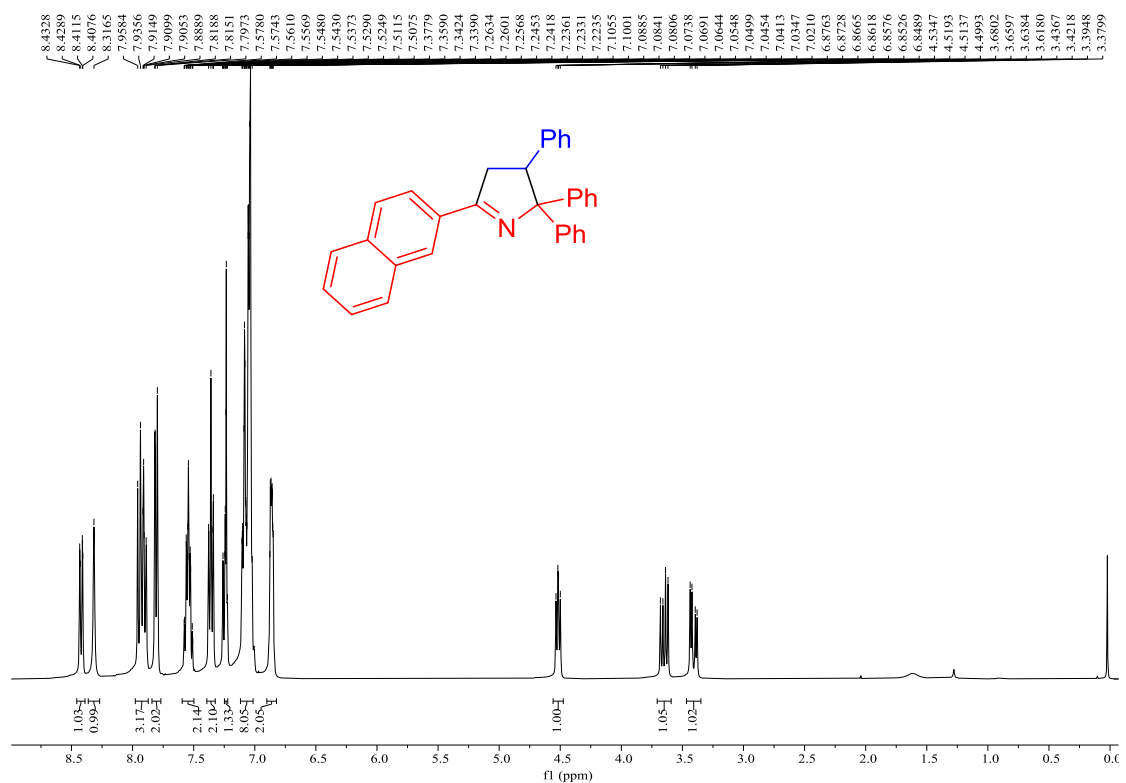

**Figure S49.**  $^{13}\text{C}\{^1\text{H}\}$  NMR spectra (100 MHz, Chloroform-*d*) of 5-(naphthalen-2-yl)-2,2,3-triphenyl-3,4-dihydro-2*H*-pyrrole (3ai).

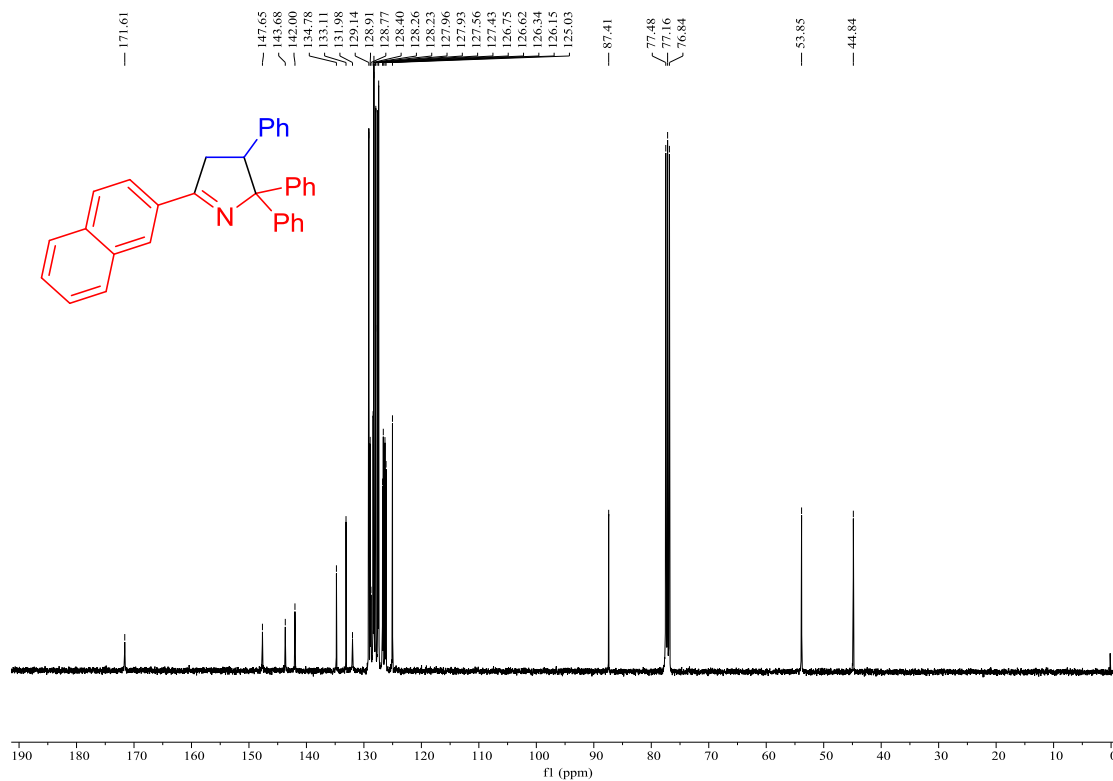

**Figure S50.**  $^1\text{H}$  NMR spectra (400 MHz, Chloroform-*d*) of 2-(2,2,3-triphenyl-3,4-dihydro-2*H*-pyrrol-5-yl)pyridine (3aj).

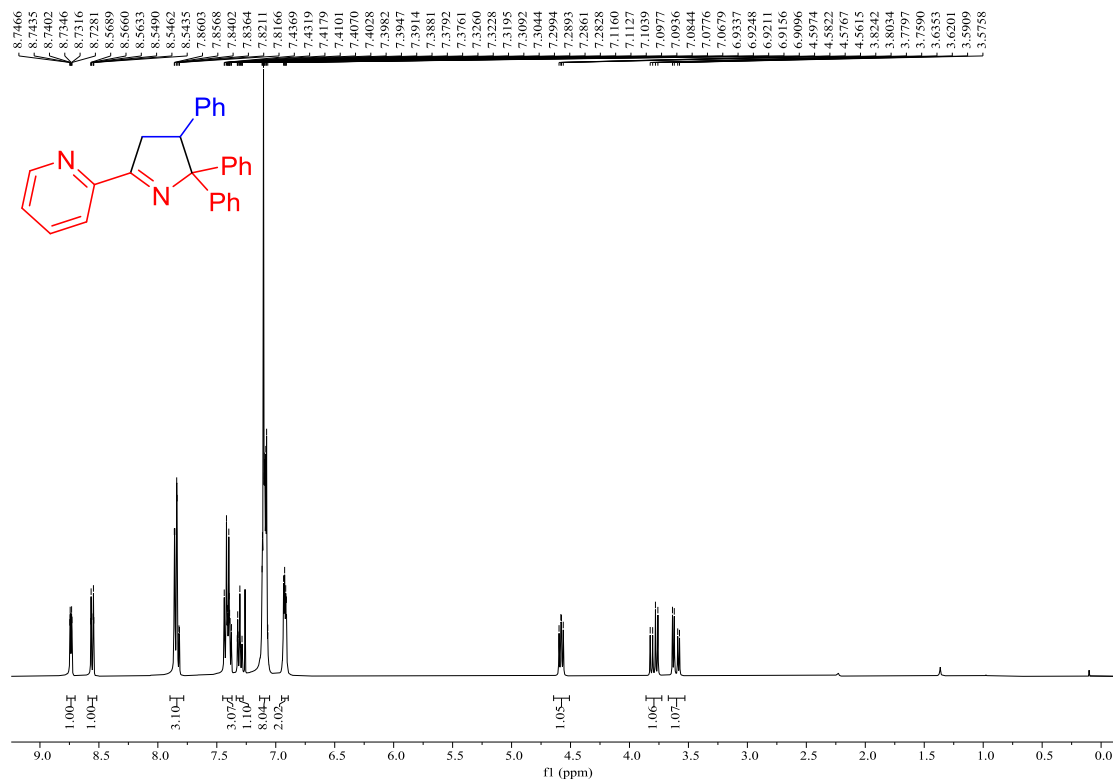

**Figure S51**  $^{13}\text{C}\{^1\text{H}\}$  NMR spectra (100 MHz, Chloroform-*d*) of 2-(2,2,3-triphenyl-3,4-dihydro-2*H*-pyrrol-5-yl)pyridine (3aj).

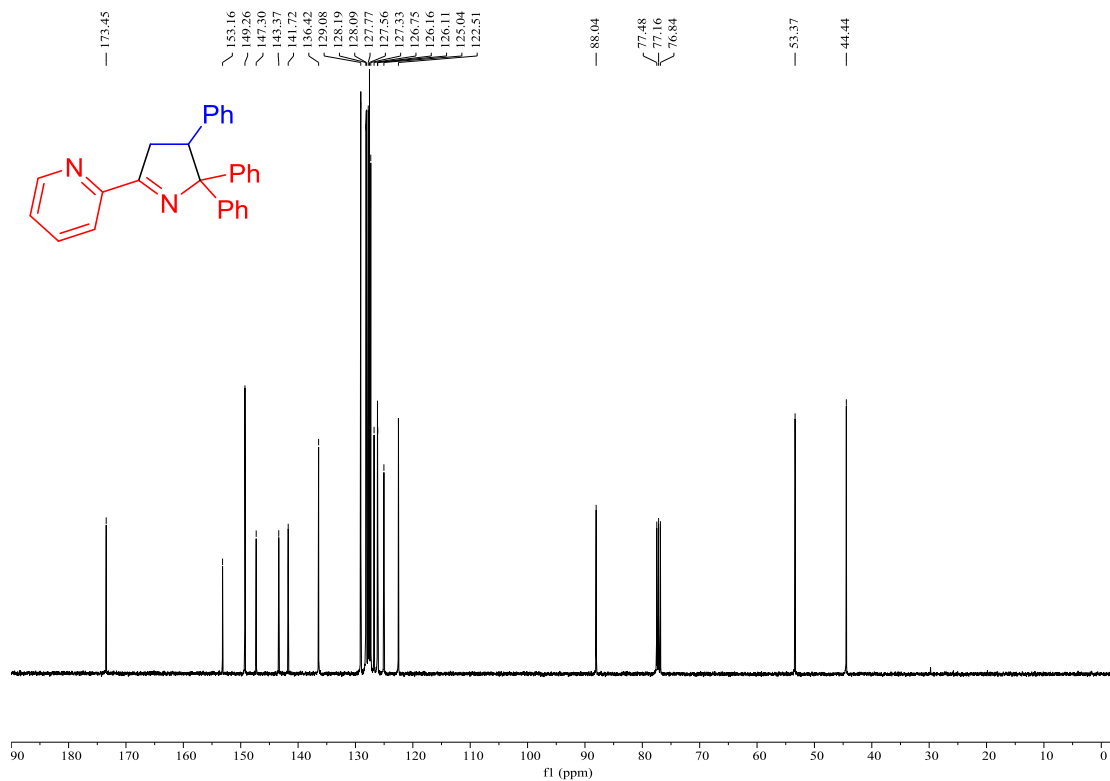

**Figure S52.**  $^1\text{H}$  NMR spectra (400 MHz, Chloroform-*d*) of 4-(2,2,3-triphenyl-3,4-dihydro-2*H*-pyrrol-5-yl)pyridine (3ak).

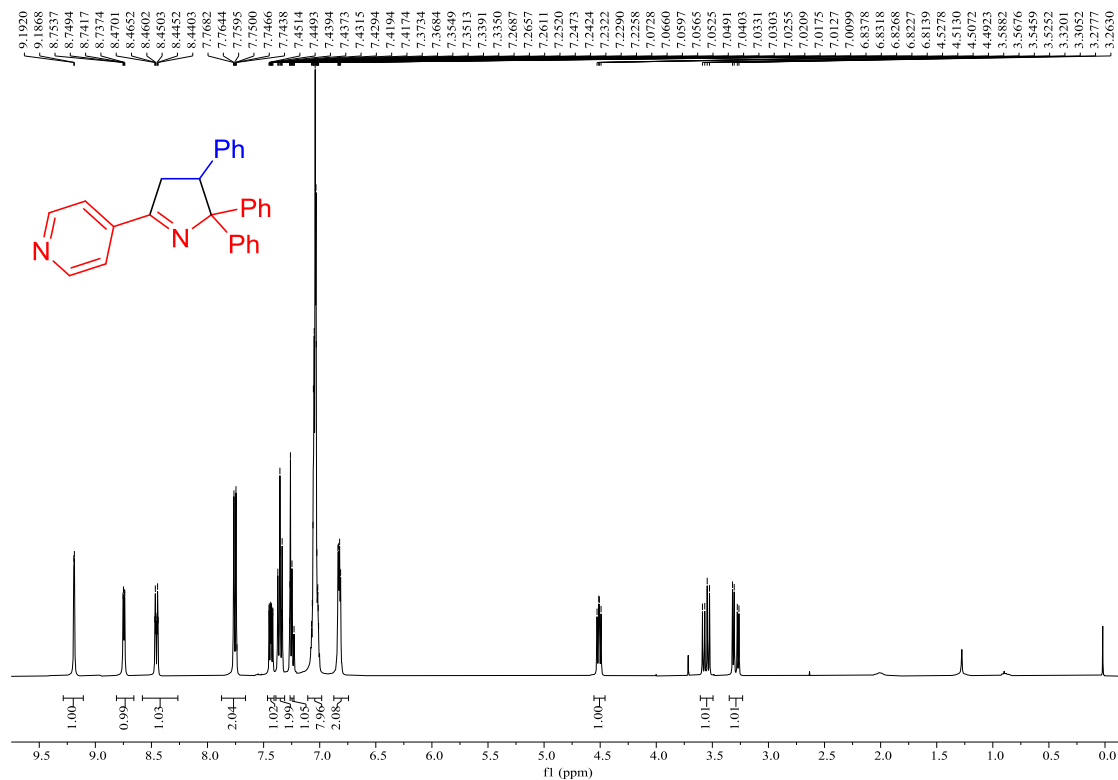

Figure S53.  $^{13}\text{C}\{^1\text{H}\}$  NMR spectra (100 MHz, Chloroform-*d*) of 4-(2,2,3-triphenyl-3,4-dihydro-2*H*-pyrrol-5-yl)pyridine (3ak).

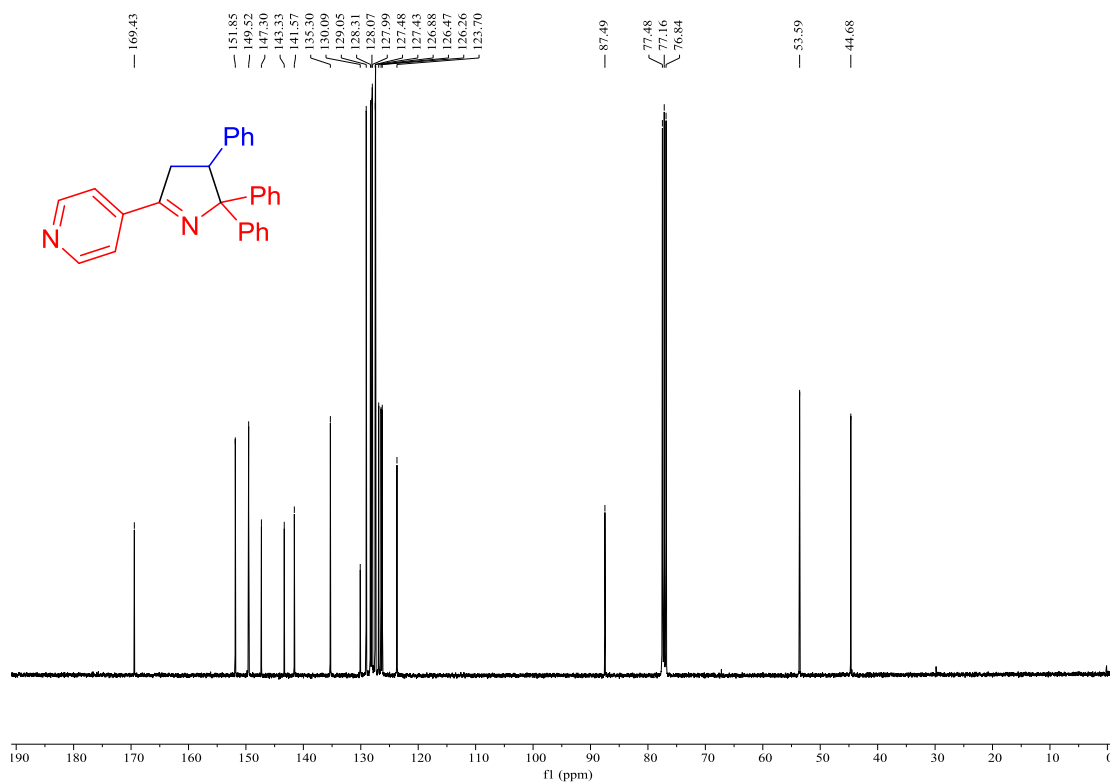

Figure S54.  $^1\text{H}$  NMR spectra (400 MHz, Chloroform-*d*) of 5-(furan-2-yl)-2,2,3-triphenyl-3,4-dihydro-2*H*-pyrrole (3al).

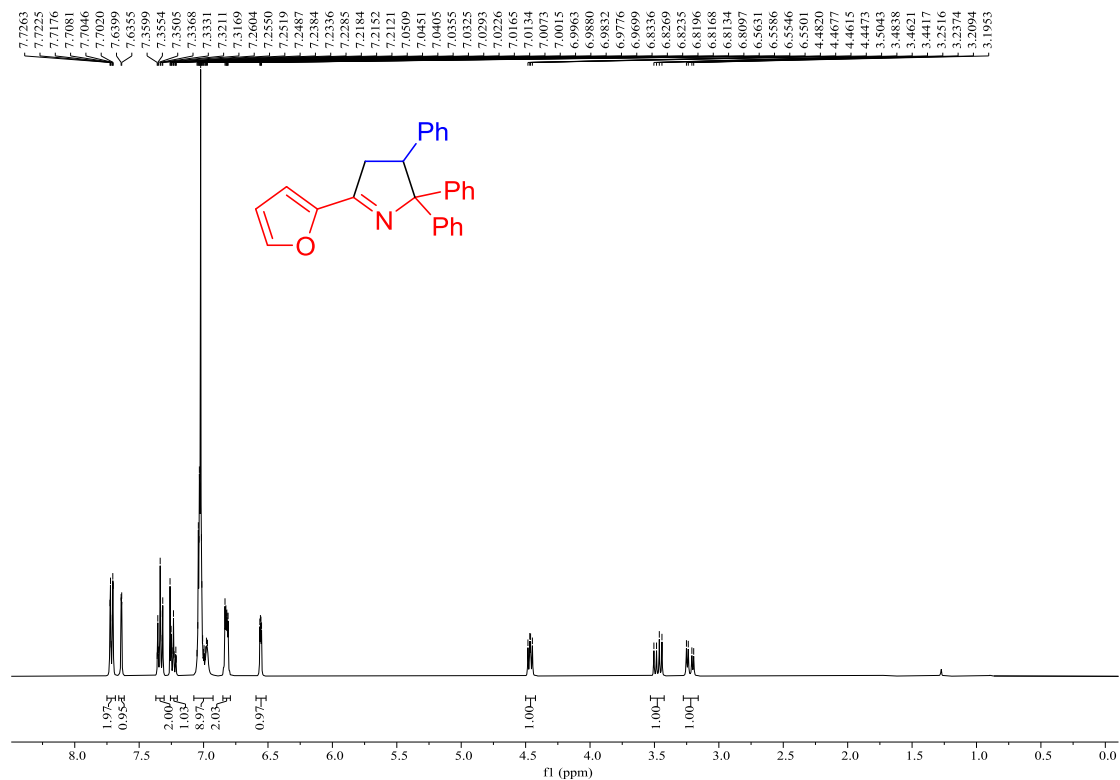

Figure S55.  $^{13}\text{C}\{^1\text{H}\}$  NMR spectra (100 MHz, Chloroform-*d*) of 5-(furan-2-yl)-2,2,3-triphenyl-3,4-dihydro-2*H*-pyrrole (3a).

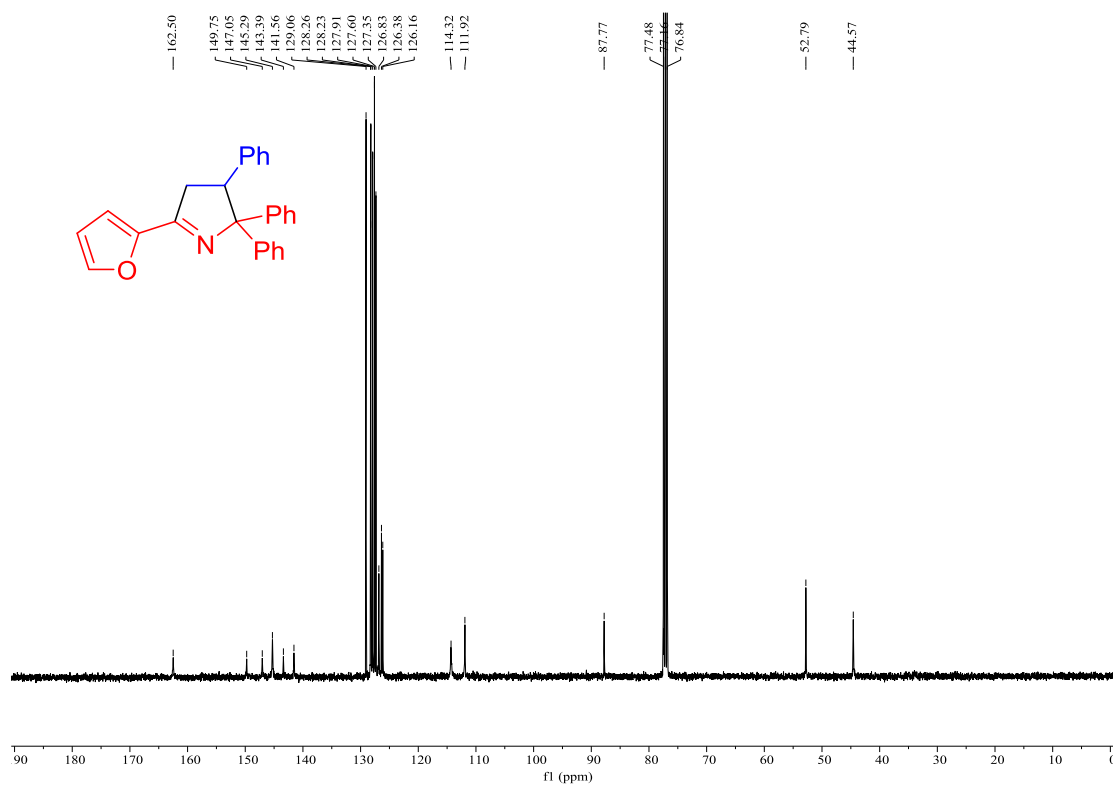

Figure S56.  $^1\text{H}$  NMR spectra (600 MHz, Chloroform-*d*) of (*E*)-*N*-(1,3-diphenylallyl)-1,1-diphenylmethanimine (4aa).

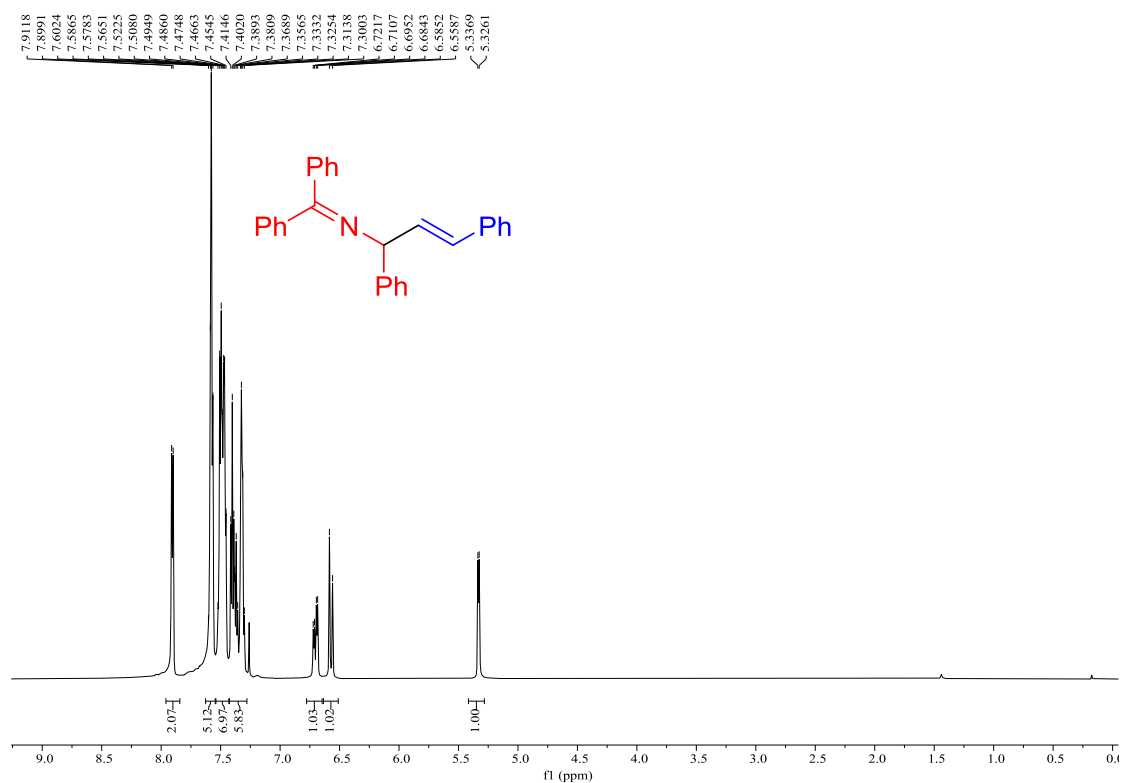



**Figure S57.**  $^{13}\text{C}\{^1\text{H}\}$  NMR spectra (150 MHz, Chloroform-*d*) of (E)-*N*-(1,3-diphenylallyl)-1,1-diphenylmethanimine (4aa).

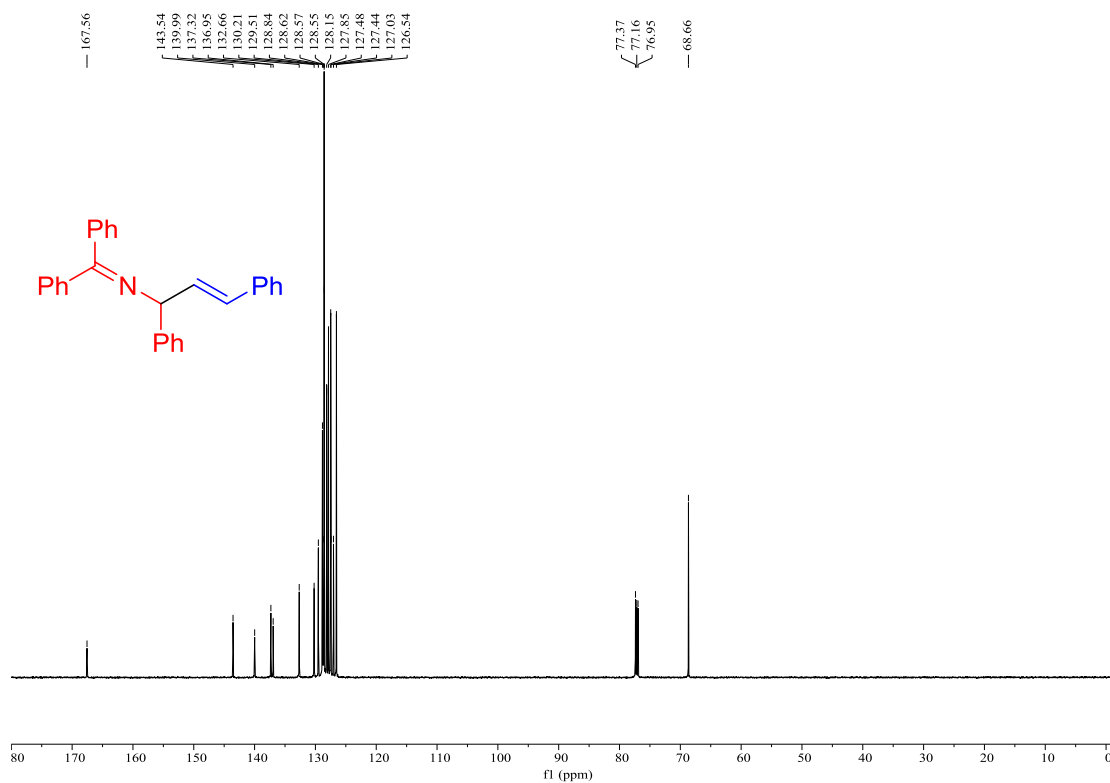

## HRMS Spectra

3aa

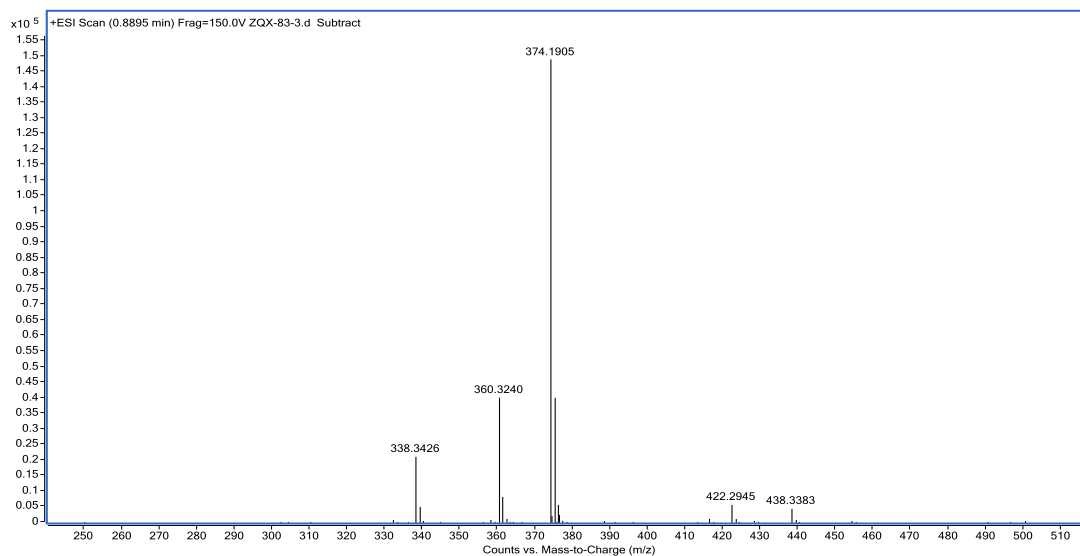

MS Formula Results: + Scan (0.8895 min) Sub (ZQX-83-3.d)

| m/z                                 | Ion                               | Formula                           | Abundance |             |          |            |            |             |               |
|-------------------------------------|-----------------------------------|-----------------------------------|-----------|-------------|----------|------------|------------|-------------|---------------|
| 374.1905                            | (M+H) <sup>+</sup>                | C <sub>28</sub> H <sub>24</sub> N | 148848.1  |             |          |            |            |             |               |
| Best                                | Formula (M)                       | Ion Formula                       | Score     | Cross Score | Calc m/z | Diff (ppm) | Mass Match | Abund Match | Spacing Match |
| <input checked="" type="checkbox"/> | C <sub>28</sub> H <sub>23</sub> N | C <sub>28</sub> H <sub>24</sub> N | 97.06     |             | 374.1903 | -0.55      | 99.75      | 91.82       | 98            |

### 3ba

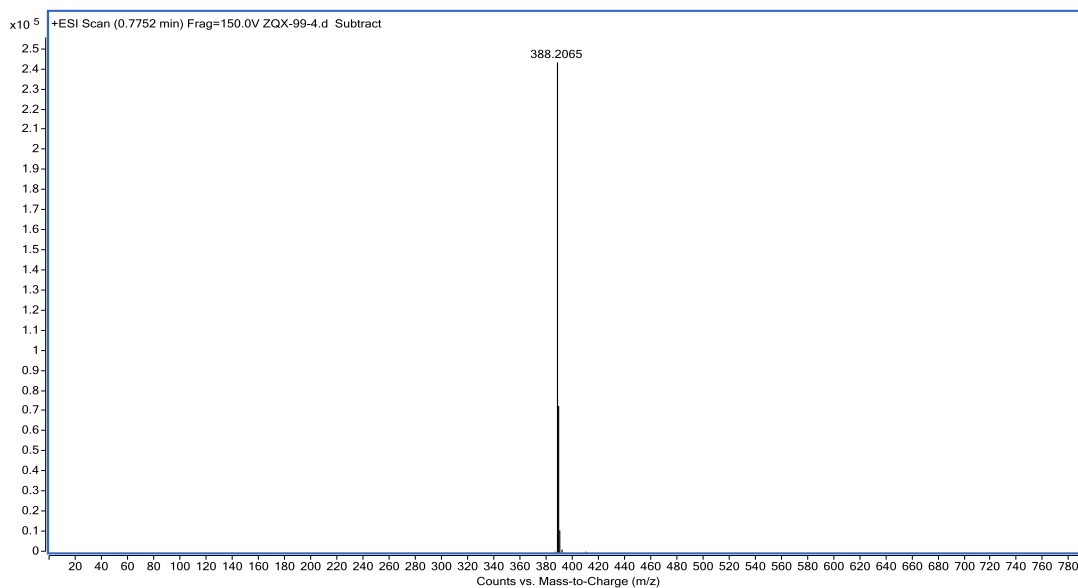

MS Formula Results: + Scan (0.7752 min) Sub (ZQX-99-4.d)

| m/z      | Ion                | Formula                           | Abundance |
|----------|--------------------|-----------------------------------|-----------|
| 388.2065 | (M+H) <sup>+</sup> | C <sub>29</sub> H <sub>26</sub> N | 243512.4  |

  

| Best                                | Formula (M)                       | Ion Formula                       | Score | Cross Score | Calc m/z | Diff (ppm) | Mass Match | Abund Match | Spacing Match |
|-------------------------------------|-----------------------------------|-----------------------------------|-------|-------------|----------|------------|------------|-------------|---------------|
| <input checked="" type="checkbox"/> | C <sub>29</sub> H <sub>25</sub> N | C <sub>29</sub> H <sub>26</sub> N | 98.3  |             | 388.206  | -1.37      | 98.4       | 97.79       | 98.71         |

### 3ca

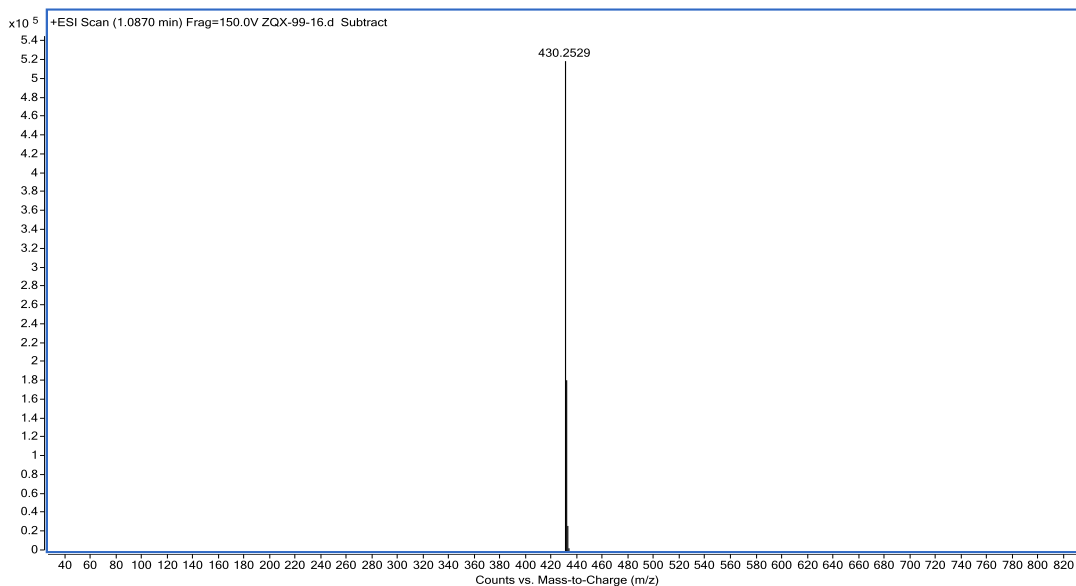

MS Formula Results: + Scan (1.0870 min) Sub (ZQX-99-16.d)

| m/z      | Ion                | Formula                           | Abundance |
|----------|--------------------|-----------------------------------|-----------|
| 430.2529 | (M+H) <sup>+</sup> | C <sub>32</sub> H <sub>32</sub> N | 518959.7  |

  

| Best                                | Formula (M)                       | Ion Formula                       | Score | Cross Score | Calc m/z | Diff (ppm) | Mass Match | Abund Match | Spacing Match |
|-------------------------------------|-----------------------------------|-----------------------------------|-------|-------------|----------|------------|------------|-------------|---------------|
| <input checked="" type="checkbox"/> | C <sub>32</sub> H <sub>31</sub> N | C <sub>32</sub> H <sub>32</sub> N | 99.54 |             | 430.2529 | -0.01      | 100        | 99.4        | 98.78         |

### 3da

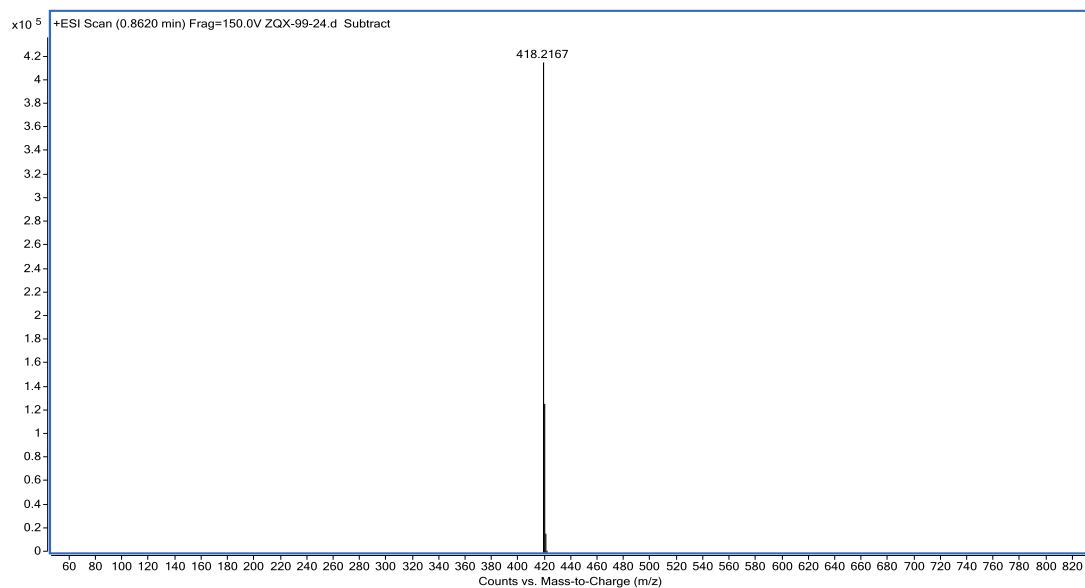

MS Formula Results: + Scan (0.8620 min) Sub (ZQX-99-24.d)

| m/z                                 | Ion                                 | Formula                             | Abundance |             |          |            |            |             |               |
|-------------------------------------|-------------------------------------|-------------------------------------|-----------|-------------|----------|------------|------------|-------------|---------------|
| 418.2167                            | (M+H) <sup>+</sup>                  | C <sub>30</sub> H <sub>28</sub> N O | 415132.5  |             |          |            |            |             |               |
| <b>Best</b>                         |                                     |                                     |           |             |          |            |            |             |               |
| <input checked="" type="checkbox"/> | C <sub>30</sub> H <sub>27</sub> N O | C <sub>30</sub> H <sub>28</sub> N O | 97.86     | Cross Score | Calc m/z | Diff (ppm) | Mass Match | Abund Match | Spacing Match |
|                                     |                                     |                                     |           |             | 418.2165 | -0.48      | 99.79      | 94.95       | 97.5          |

### 3ea

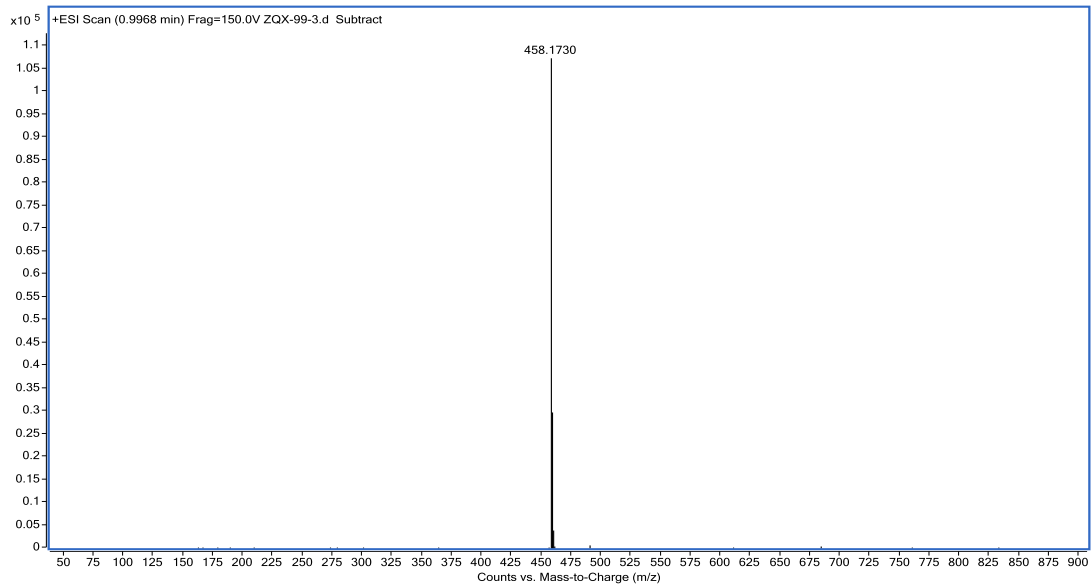

MS Formula Results: + Scan (0.9968 min) Sub (ZQX-99-3.d)

| m/z                                 | Ion                                                | Formula                                            | Abundance |             |          |            |            |             |               |
|-------------------------------------|----------------------------------------------------|----------------------------------------------------|-----------|-------------|----------|------------|------------|-------------|---------------|
| 458.173                             | (M+H) <sup>+</sup>                                 | C <sub>29</sub> H <sub>23</sub> F <sub>3</sub> N O | 107270.9  |             |          |            |            |             |               |
| <b>Best</b>                         |                                                    |                                                    |           |             |          |            |            |             |               |
| <input checked="" type="checkbox"/> | C <sub>29</sub> H <sub>22</sub> F <sub>3</sub> N O | C <sub>29</sub> H <sub>23</sub> F <sub>3</sub> N O | 95.74     | Cross Score | Calc m/z | Diff (ppm) | Mass Match | Abund Match | Spacing Match |
|                                     |                                                    |                                                    |           |             | 458.1726 | -0.92      | 99.15      | 90.81       | 94.82         |

### 3fa

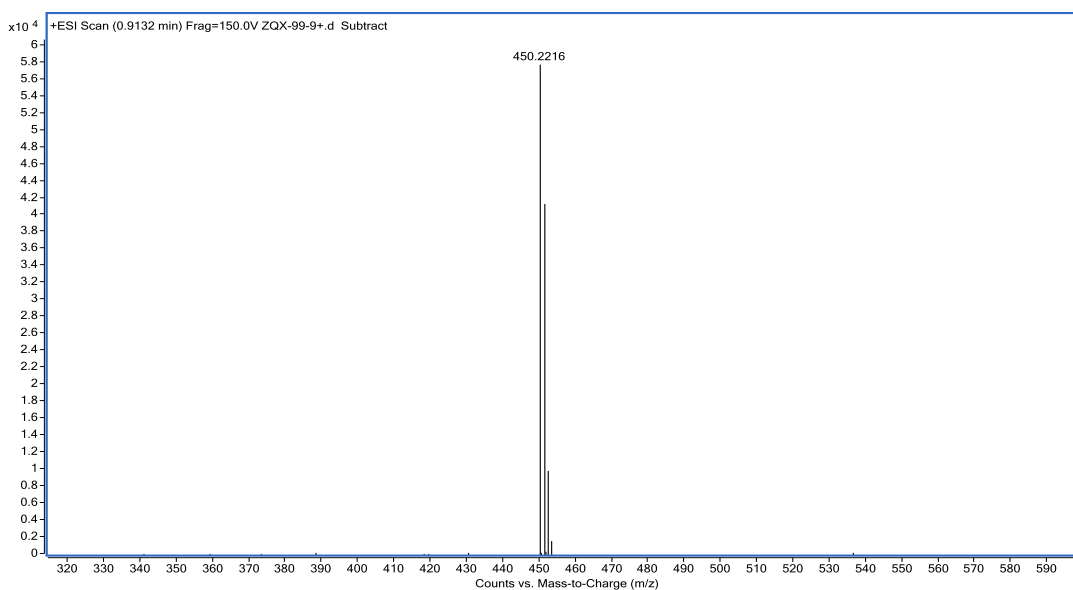

MS Formula Results: + Scan (0.9132 min) Sub (ZQX-99-9+.d)

| m/z      | Ion                | Formula                           | Abundance |
|----------|--------------------|-----------------------------------|-----------|
| 450.2216 | (M+H) <sup>+</sup> | C <sub>34</sub> H <sub>28</sub> N | 57708.5   |

  

| Best                                | Formula (M)                       | Ion Formula                       | Score | Cross Score | Calc m/z | Diff (ppm) | Mass Match | Abund Match | Spacing Match |
|-------------------------------------|-----------------------------------|-----------------------------------|-------|-------------|----------|------------|------------|-------------|---------------|
| <input checked="" type="checkbox"/> | C <sub>34</sub> H <sub>27</sub> N | C <sub>34</sub> H <sub>28</sub> N | 47.61 |             | 450.2216 | 0.16       | 99.97      | 0           | 0             |

### 3ga

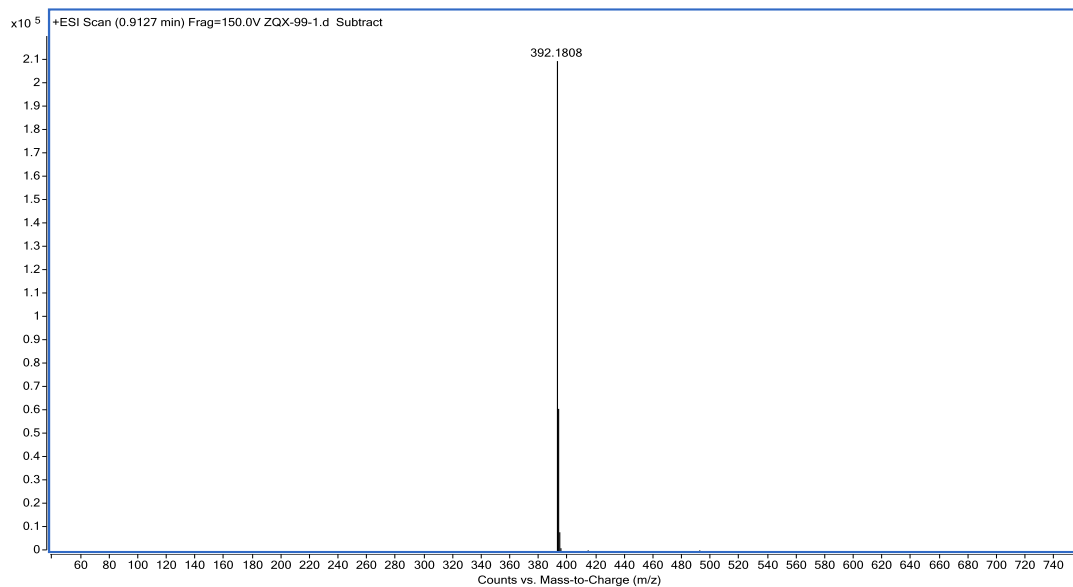

MS Formula Results: + Scan (0.9127 min) Sub (ZQX-99-1.d)

| m/z      | Ion                | Formula                                          | Abundance |
|----------|--------------------|--------------------------------------------------|-----------|
| 392.1808 | (M+H) <sup>+</sup> | C <sub>28</sub> H <sub>23</sub> F <sub>2</sub> N | 209452.5  |

  

| Best                                | Formula (M)                                      | Ion Formula                                      | Score | Cross Score | Calc m/z | Diff (ppm) | Mass Match | Abund Match | Spacing Match |
|-------------------------------------|--------------------------------------------------|--------------------------------------------------|-------|-------------|----------|------------|------------|-------------|---------------|
| <input checked="" type="checkbox"/> | C <sub>28</sub> H <sub>22</sub> F <sub>2</sub> N | C <sub>28</sub> H <sub>23</sub> F <sub>2</sub> N | 99.03 |             | 392.1809 | 0.12       | 99.99      | 98.11       | 98.2          |

### 3ha

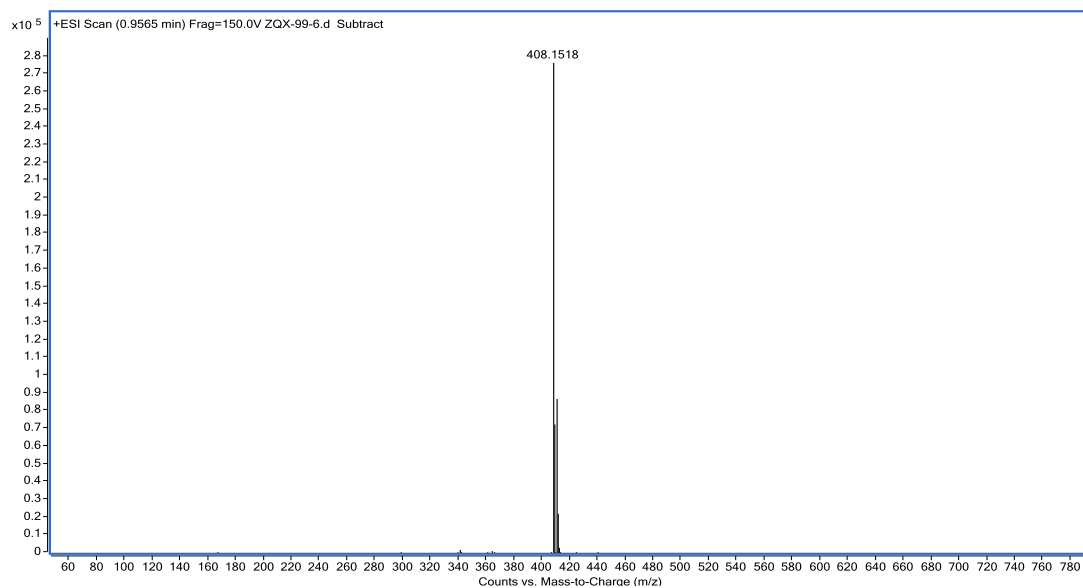

MS Formula Results: + Scan (0.9565 min) Sub (ZQX-99-6.d)

| m/z      | Ion                | Formula                              | Abundance |
|----------|--------------------|--------------------------------------|-----------|
| 408.1518 | (M+H) <sup>+</sup> | C <sub>28</sub> H <sub>23</sub> Cl N | 276104.8  |

  

| Best                                | Formula (M)                          | Ion Formula                          | Score | Cross Score | Calc m/z | Diff (ppm) | Mass Match | Abund Match | Spacing Match |
|-------------------------------------|--------------------------------------|--------------------------------------|-------|-------------|----------|------------|------------|-------------|---------------|
| <input checked="" type="checkbox"/> | C <sub>28</sub> H <sub>22</sub> Cl N | C <sub>28</sub> H <sub>23</sub> Cl N | 96.12 |             | 408.1514 | -1.26      | 98.57      | 90.5        | 97.98         |

### 3ia

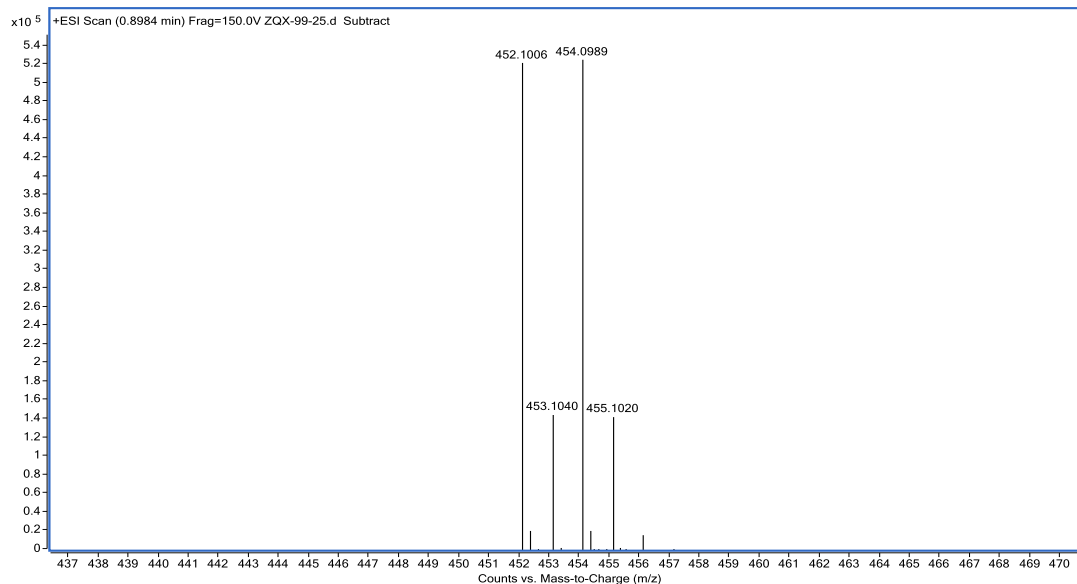

MS Formula Results: + Scan (0.8984 min) Sub (ZQX-99-25.d)

| m/z      | Ion                | Formula                              | Abundance |
|----------|--------------------|--------------------------------------|-----------|
| 452.1006 | (M+H) <sup>+</sup> | C <sub>28</sub> H <sub>23</sub> Br N | 521714.3  |

  

| Best                                | Formula (M)                          | Ion Formula                          | Score | Cross Score | Calc m/z | Diff (ppm) | Mass Match | Abund Match | Spacing Match |
|-------------------------------------|--------------------------------------|--------------------------------------|-------|-------------|----------|------------|------------|-------------|---------------|
| <input checked="" type="checkbox"/> | C <sub>28</sub> H <sub>22</sub> Br N | C <sub>28</sub> H <sub>23</sub> Br N | 98.05 |             | 452.1008 | 0.63       | 99.61      | 93.94       | 99.87         |

3ja

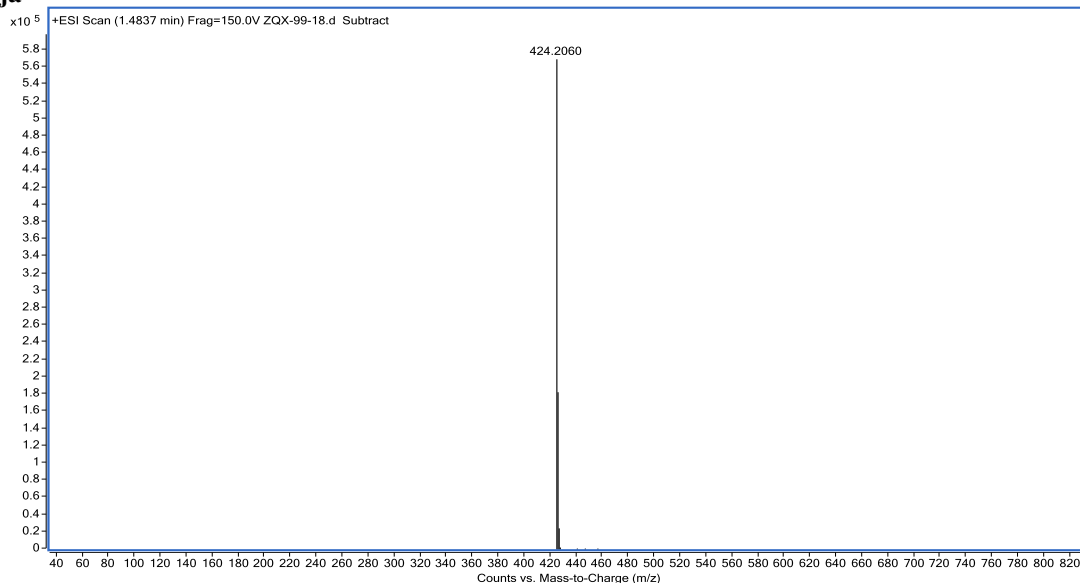

MS Formula Results: + Scan (1.4837 min) Sub (ZQX-99-18.d)

| m/z     | Ion                | Formula   | Abundance |
|---------|--------------------|-----------|-----------|
| 424.206 | (M+H) <sup>+</sup> | C32 H26 N | 568757.1  |

  

| Best                                | Formula (M) | Ion Formula | Score | Cross Score | Calc m/z | Diff (ppm) | Mass Match | Abund Match | Spacing Match |
|-------------------------------------|-------------|-------------|-------|-------------|----------|------------|------------|-------------|---------------|
| <input checked="" type="checkbox"/> | C32 H25 N   | C32 H26 N   | 98.42 |             | 424.206  | -0.02      | 100        | 94.51       | 99.95         |

3ka

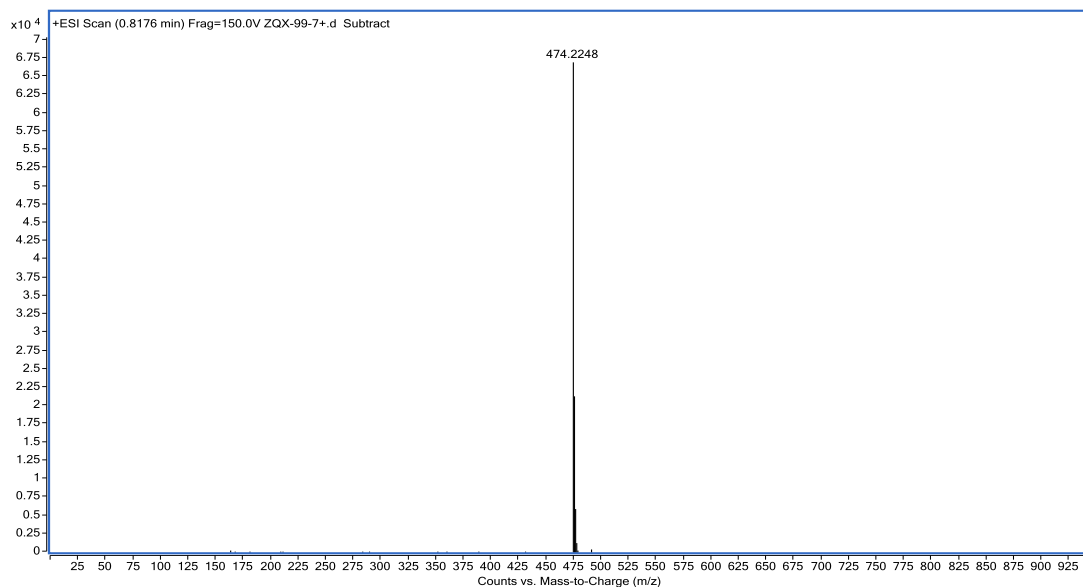

MS Formula Results: + Scan (0.8176 min) Sub (ZQX-99-7+.d)

| m/z      | Ion                | Formula     | Abundance |
|----------|--------------------|-------------|-----------|
| 474.2248 | (M+H) <sup>+</sup> | C33 H32 N S | 66904.7   |

  

| Best                                | Formula (M) | Ion Formula | Score | Cross Score | Calc m/z | Diff (ppm) | Mass Match | Abund Match | Spacing Match |
|-------------------------------------|-------------|-------------|-------|-------------|----------|------------|------------|-------------|---------------|
| <input checked="" type="checkbox"/> | C33 H31 N S | C33 H32 N S | 96.55 |             | 474.225  | 0.43       | 99.81      | 88.5        | 99.7          |

### 3la

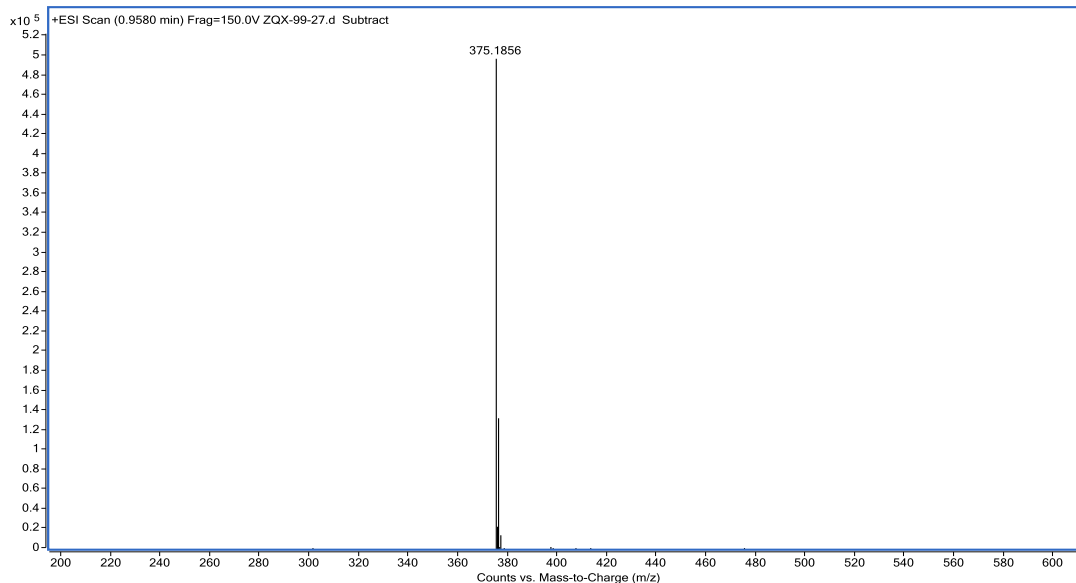

MS Formula Results: + Scan (0.9580 min) Sub (ZQX-99-27.d)

| m/z      | Ion                | Formula    | Abundance |
|----------|--------------------|------------|-----------|
| 375.1856 | (M+H) <sup>+</sup> | C27 H23 N2 | 496650.5  |

  

| Best                                | Formula (M) | Ion Formula | Score | Cross Score | Calc m/z | Diff (ppm) | Mass Match | Abund Match | Spacing Match |
|-------------------------------------|-------------|-------------|-------|-------------|----------|------------|------------|-------------|---------------|
| <input checked="" type="checkbox"/> | C27 H22 N2  | C27 H23 N2  | 97.84 |             | 375.1856 | -0.19      | 99.97      | 92.51       | 99.96         |

### 3ma

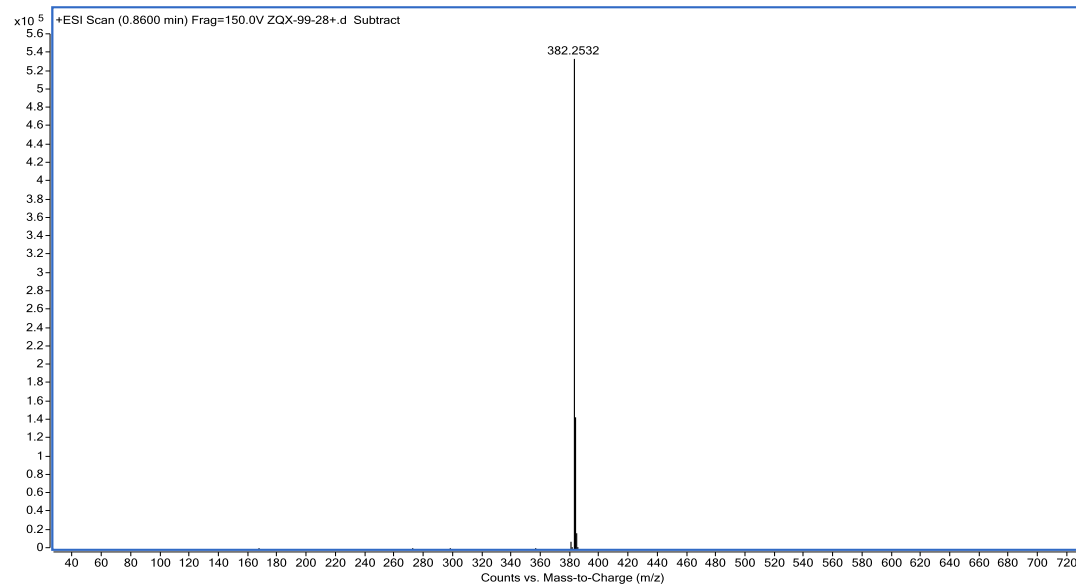

MS Formula Results: + Scan (0.8600 min) Sub (ZQX-99-28+.d)

| m/z      | Ion                | Formula   | Abundance |
|----------|--------------------|-----------|-----------|
| 382.2532 | (M+H) <sup>+</sup> | C28 H32 N | 533341.3  |

  

| Best                                | Formula (M) | Ion Formula | Score | Cross Score | Calc m/z | Diff (ppm) | Mass Match | Abund Match | Spacing Match |
|-------------------------------------|-------------|-------------|-------|-------------|----------|------------|------------|-------------|---------------|
| <input checked="" type="checkbox"/> | C28 H31 N   | C28 H32 N   | 97.15 |             | 382.2529 | -0.62      | 99.68      | 90.84       | 99.67         |

### 3na

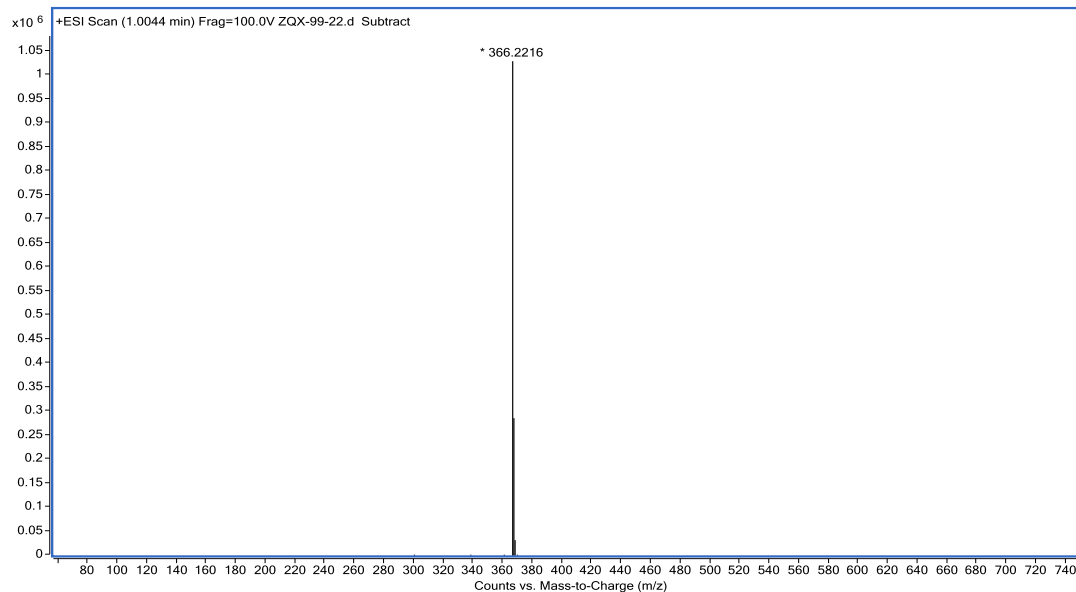

MS Formula Results: + Scan (1.0044 min) Sub (ZQX-99-22.d)

| m/z      | Ion                | Formula                           | Abundance |
|----------|--------------------|-----------------------------------|-----------|
| 366.2216 | (M+H) <sup>+</sup> | C <sub>27</sub> H <sub>28</sub> N | 1028606.1 |

  

| Best                                | Formula (M)                       | Ion Formula                       | Score | Cross Score | Calc m/z | Diff (ppm) | Mass Match | Abund Match | Spacing Match |
|-------------------------------------|-----------------------------------|-----------------------------------|-------|-------------|----------|------------|------------|-------------|---------------|
| <input checked="" type="checkbox"/> | C <sub>27</sub> H <sub>27</sub> N | C <sub>27</sub> H <sub>28</sub> N | 98.74 |             | 366.2216 | 0.16       | 99.98      | 97.16       | 98.15         |

### 3oa

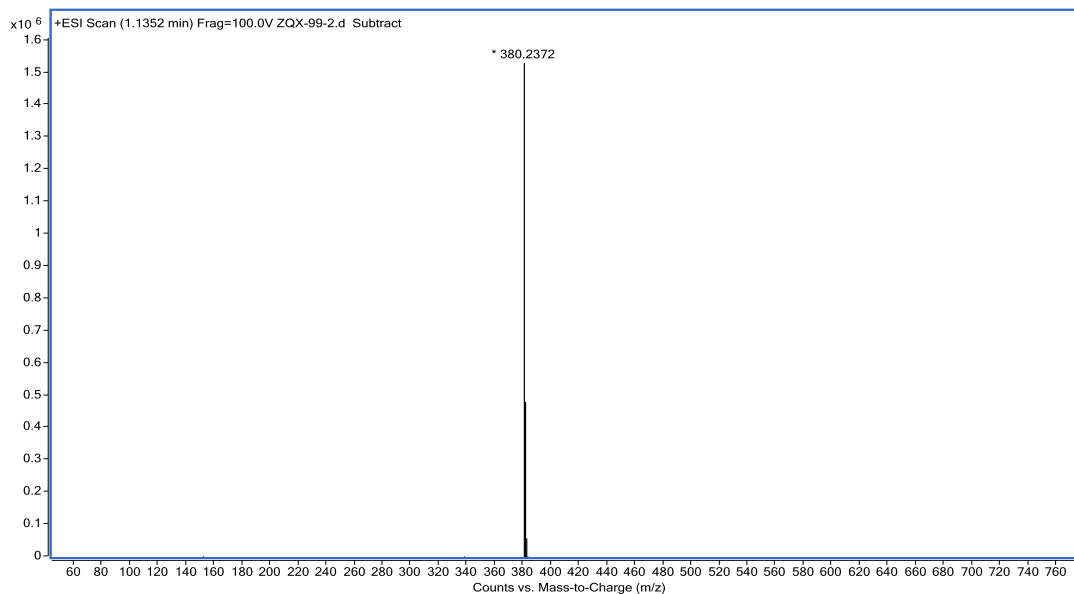

MS Formula Results: + Scan (1.1352 min) Sub (ZQX-99-2.d)

| m/z      | Ion                | Formula                           | Abundance |
|----------|--------------------|-----------------------------------|-----------|
| 380.2372 | (M+H) <sup>+</sup> | C <sub>28</sub> H <sub>30</sub> N | 1529291.6 |

  

| Best                                | Formula (M)                       | Ion Formula                       | Score | Cross Score | Calc m/z | Diff (ppm) | Mass Match | Abund Match | Spacing Match |
|-------------------------------------|-----------------------------------|-----------------------------------|-------|-------------|----------|------------|------------|-------------|---------------|
| <input checked="" type="checkbox"/> | C <sub>28</sub> H <sub>29</sub> N | C <sub>28</sub> H <sub>30</sub> N | 98.39 |             | 380.2373 | 0.33       | 99.91      | 98.96       | 94.67         |



### 3ab

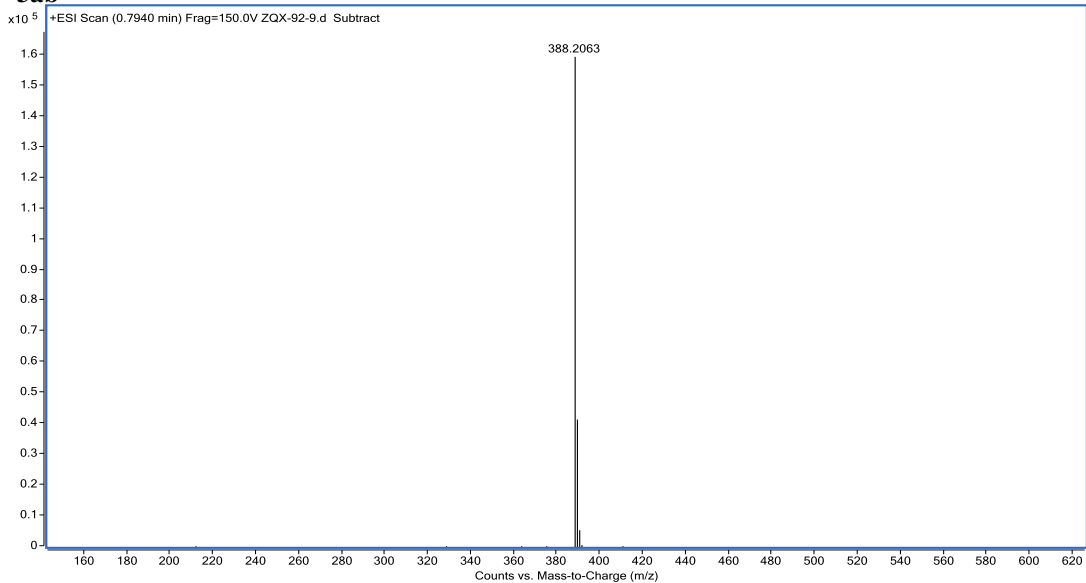

MS Formula Results: + Scan (0.7940 min) Sub (ZQX-92-9.d)

| m/z      | Ion                | Formula                           | Abundance |
|----------|--------------------|-----------------------------------|-----------|
| 388.2063 | (M+H) <sup>+</sup> | C <sub>29</sub> H <sub>26</sub> N | 159290    |

  

| Best                                | Formula (M)                       | Ion Formula                       | Score | Cross Score | Calc m/z | Diff (ppm) | Mass Match | Abund Match | Spacing Match |
|-------------------------------------|-----------------------------------|-----------------------------------|-------|-------------|----------|------------|------------|-------------|---------------|
| <input checked="" type="checkbox"/> | C <sub>29</sub> H <sub>25</sub> N | C <sub>29</sub> H <sub>26</sub> N | 94.25 |             | 388.206  | -0.91      | 99.29      | 81.47       | 99.53         |

### 3ac

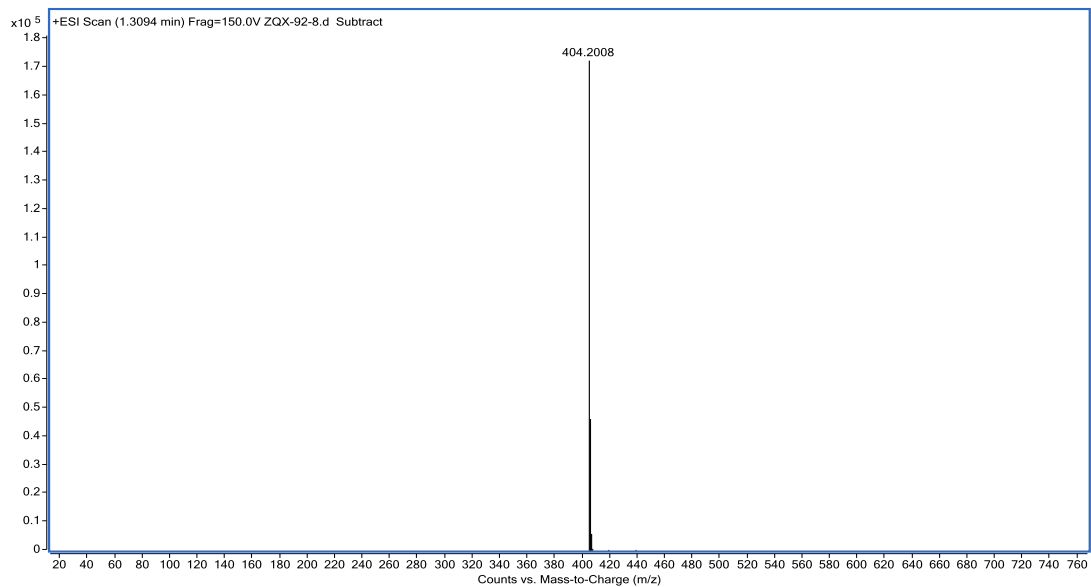

MS Formula Results: + Scan (1.3094 min) Sub (ZQX-92-8.d)

| m/z      | Ion                | Formula                             | Abundance |
|----------|--------------------|-------------------------------------|-----------|
| 404.2008 | (M+H) <sup>+</sup> | C <sub>29</sub> H <sub>26</sub> N O | 172314.1  |

  

| Best                                | Formula (M)                         | Ion Formula                         | Score | Cross Score | Calc m/z | Diff (ppm) | Mass Match | Abund Match | Spacing Match |
|-------------------------------------|-------------------------------------|-------------------------------------|-------|-------------|----------|------------|------------|-------------|---------------|
| <input checked="" type="checkbox"/> | C <sub>29</sub> H <sub>25</sub> N O | C <sub>29</sub> H <sub>26</sub> N O | 95.83 |             | 404.2009 | 0.17       | 99.97      | 86.52       | 98.7          |

### 3ad

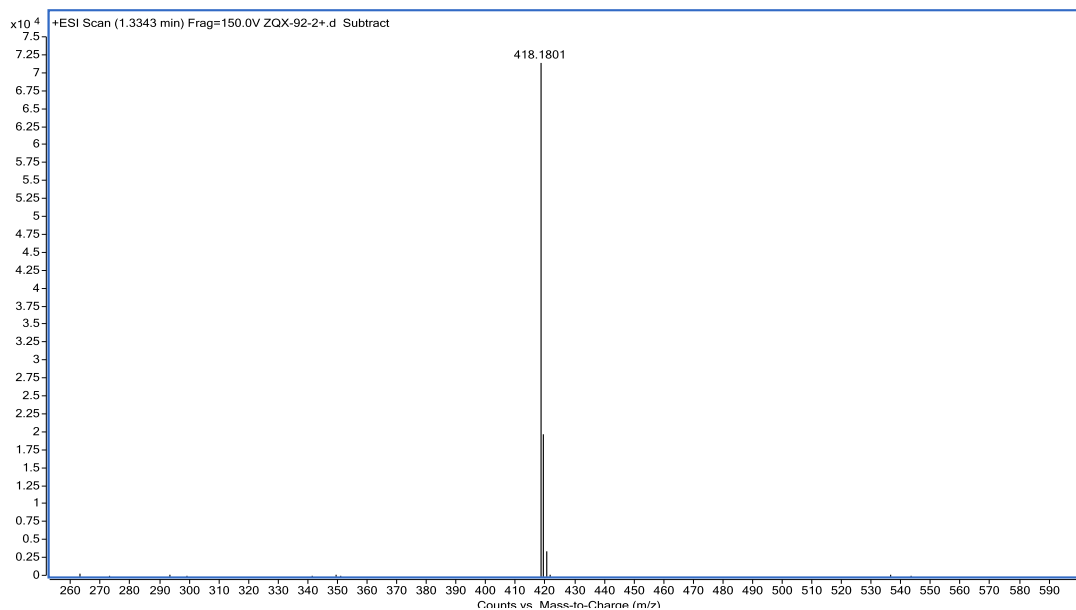

MS Formula Results: + Scan (1.3343 min) Sub (ZQX-92-2+.d)

| m/z      | Ion                | Formula                                          | Abundance |
|----------|--------------------|--------------------------------------------------|-----------|
| 418.1801 | (M+H) <sup>+</sup> | C <sub>29</sub> H <sub>24</sub> N O <sub>2</sub> | 71435.7   |

  

| Best                                | Formula (M)                                      | Ion Formula                                      | Score | Cross Score | Calc m/z | Diff (ppm) | Mass Match | Abund Match | Spacing Match |
|-------------------------------------|--------------------------------------------------|--------------------------------------------------|-------|-------------|----------|------------|------------|-------------|---------------|
| <input checked="" type="checkbox"/> | C <sub>29</sub> H <sub>23</sub> N O <sub>2</sub> | C <sub>29</sub> H <sub>24</sub> N O <sub>2</sub> | 96.98 |             | 418.1802 | 0.07       | 100        | 90.34       | 98.93         |

### 3ae

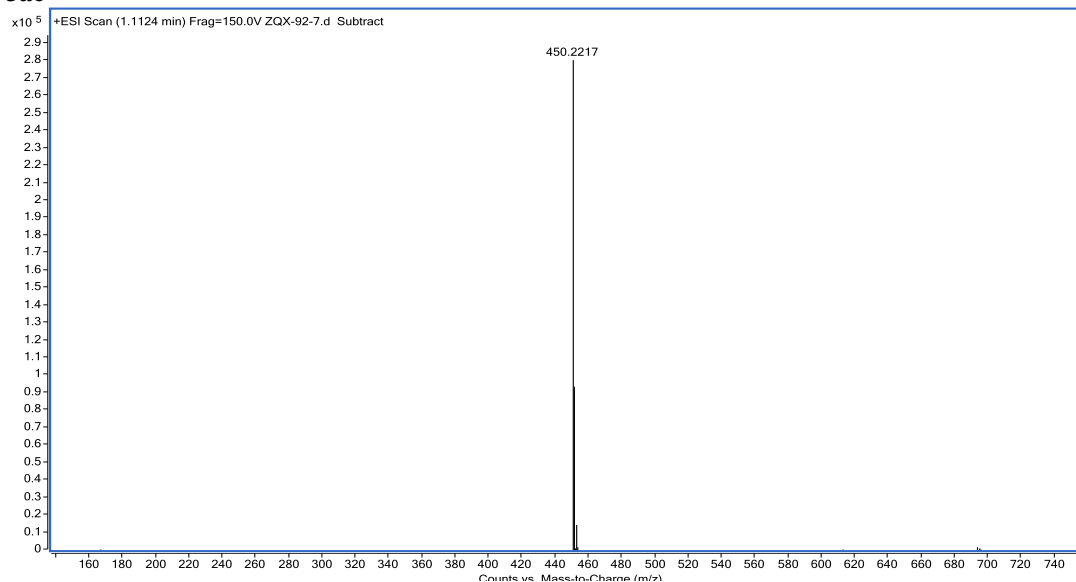

MS Formula Results: + Scan (1.1124 min) Sub (ZQX-92-7.d)

| m/z      | Ion                | Formula                           | Abundance |
|----------|--------------------|-----------------------------------|-----------|
| 450.2217 | (M+H) <sup>+</sup> | C <sub>34</sub> H <sub>28</sub> N | 280195.3  |

  

| Best                                | Formula (M)                       | Ion Formula                       | Score | Cross Score | Calc m/z | Diff (ppm) | Mass Match | Abund Match | Spacing Match |
|-------------------------------------|-----------------------------------|-----------------------------------|-------|-------------|----------|------------|------------|-------------|---------------|
| <input checked="" type="checkbox"/> | C <sub>34</sub> H <sub>27</sub> N | C <sub>34</sub> H <sub>28</sub> N | 97.66 |             | 450.2216 | -0.15      | 99.98      | 92.4        | 99.33         |

### 3af

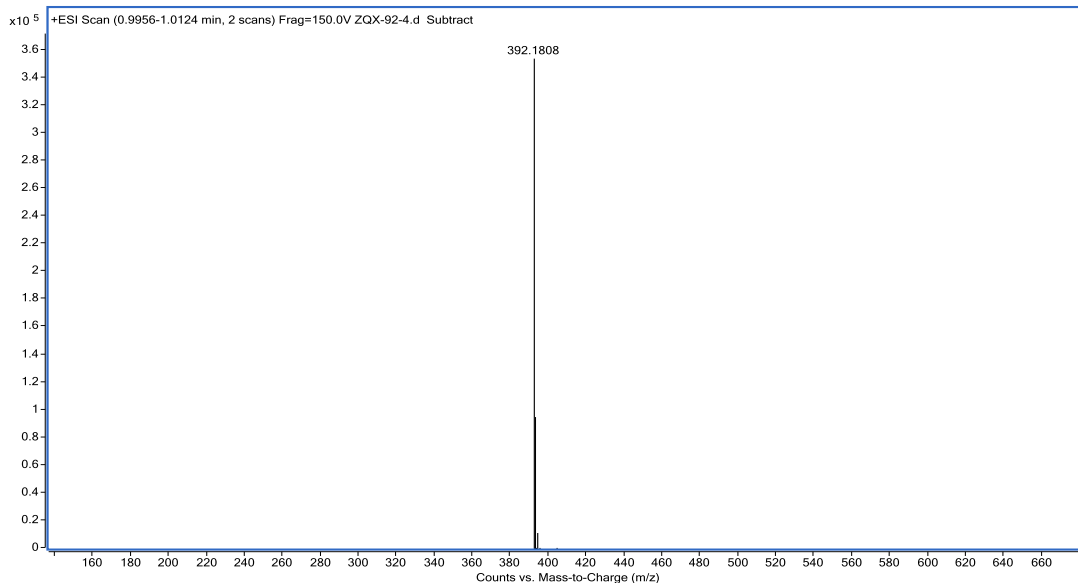

MS Formula Results: + Scan (0.9956-1.0124 min) Sub (ZQX-92-4.d)

| m/z                                 | Ion                                 | Formula                             | Abundance |             |          |            |            |             |               |
|-------------------------------------|-------------------------------------|-------------------------------------|-----------|-------------|----------|------------|------------|-------------|---------------|
| 392.1808                            | (M+H) <sup>+</sup>                  | C <sub>28</sub> H <sub>23</sub> F N | 353691.5  |             |          |            |            |             |               |
| Best                                | Formula (M)                         | Ion Formula                         | Score     | Cross Score | Calc m/z | Diff (ppm) | Mass Match | Abund Match | Spacing Match |
| <input checked="" type="checkbox"/> | C <sub>28</sub> H <sub>22</sub> F N | C <sub>28</sub> H <sub>23</sub> F N | 97.33     |             | 392.1809 | 0.15       | 99.98      | 91.08       | 99.54         |

### 3ag

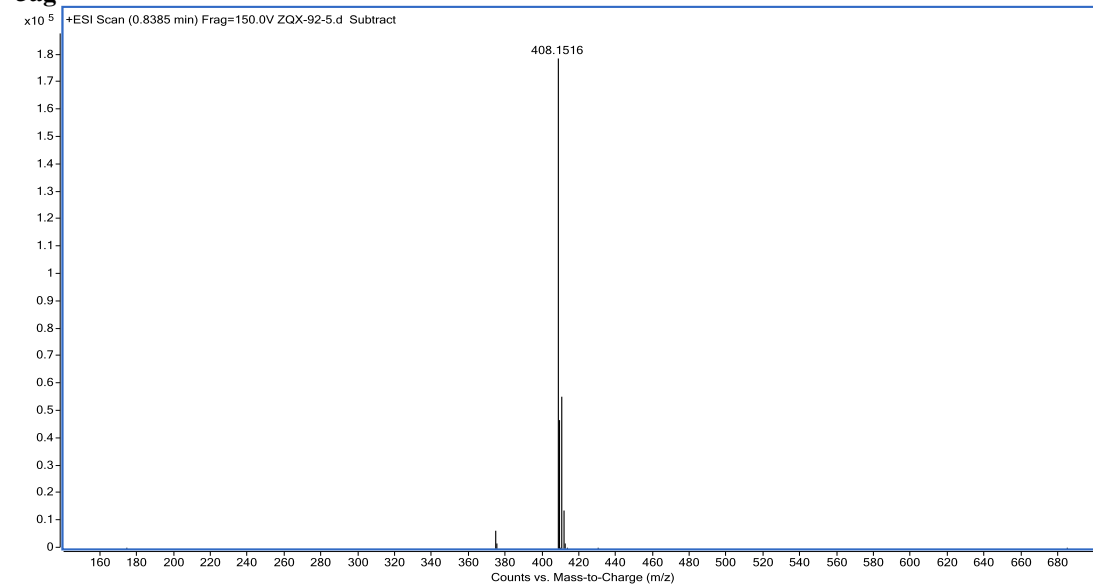

MS Formula Results: + Scan (0.8385 min) Sub (ZQX-92-5.d)

| m/z                                 | Ion                                  | Formula                              | Abundance |             |          |            |            |             |               |
|-------------------------------------|--------------------------------------|--------------------------------------|-----------|-------------|----------|------------|------------|-------------|---------------|
| 408.1516                            | (M+H) <sup>+</sup>                   | C <sub>28</sub> H <sub>23</sub> Cl N | 178678.3  |             |          |            |            |             |               |
| Best                                | Formula (M)                          | Ion Formula                          | Score     | Cross Score | Calc m/z | Diff (ppm) | Mass Match | Abund Match | Spacing Match |
| <input checked="" type="checkbox"/> | C <sub>28</sub> H <sub>22</sub> Cl N | C <sub>28</sub> H <sub>23</sub> Cl N | 95.93     |             | 408.1514 | -0.78      | 99.46      | 89.55       | 96.5          |

### 3ah

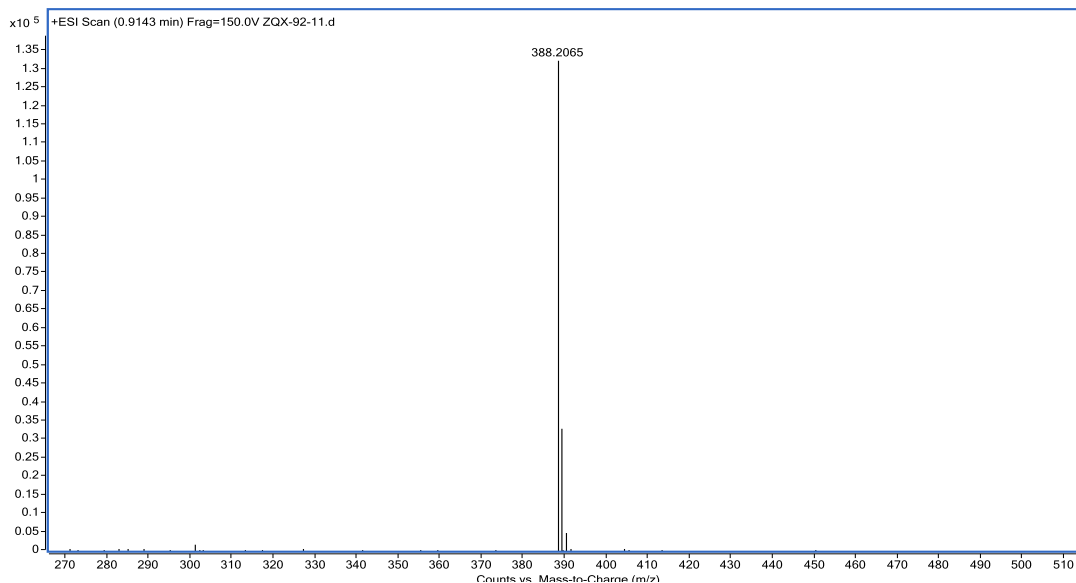

MS Formula Results: + Scan (0.9143 min) (ZQX-92-11.d)

| m/z      | Ion                | Formula                           | Abundance |
|----------|--------------------|-----------------------------------|-----------|
| 388.2065 | (M+H) <sup>+</sup> | C <sub>29</sub> H <sub>26</sub> N | 132194.3  |

  

| Best                                | Formula (M)                       | Ion Formula                       | Score | Cross Score | Calc m/z | Diff (ppm) | Mass Match | Abund Match | Spacing Match |
|-------------------------------------|-----------------------------------|-----------------------------------|-------|-------------|----------|------------|------------|-------------|---------------|
| <input checked="" type="checkbox"/> | C <sub>29</sub> H <sub>25</sub> N | C <sub>29</sub> H <sub>26</sub> N | 91.77 |             | 388.206  | -1.33      | 98.49      | 75.05       | 98.37         |

### 3ai

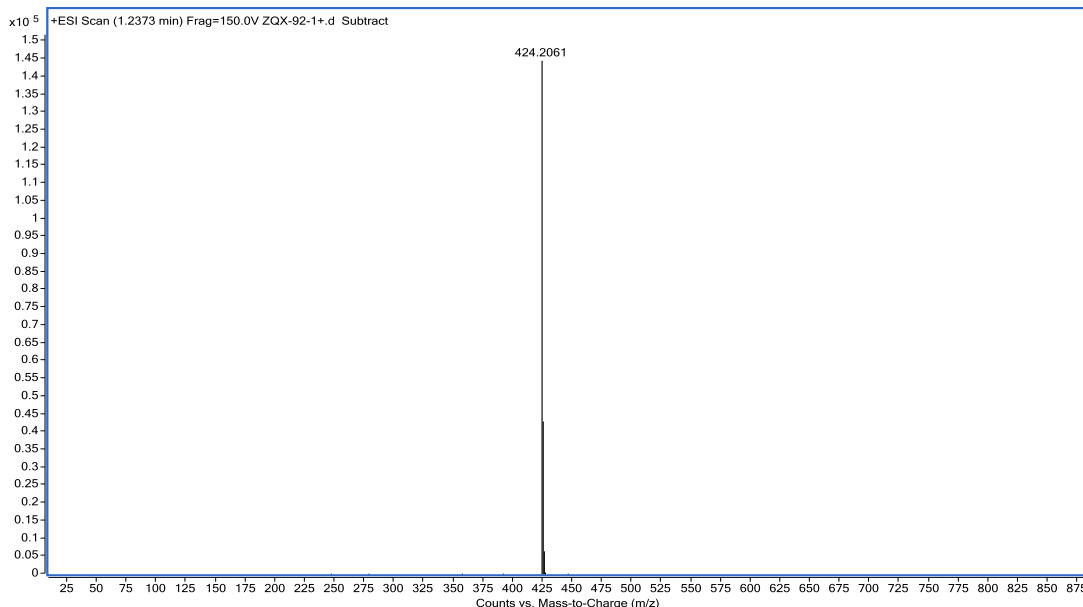

MS Formula Results: + Scan (1.2373 min) Sub (ZQX-92-1+.d)

| m/z      | Ion                | Formula                           | Abundance |
|----------|--------------------|-----------------------------------|-----------|
| 424.2061 | (M+H) <sup>+</sup> | C <sub>32</sub> H <sub>26</sub> N | 144377.8  |

  

| Best                                | Formula (M)                       | Ion Formula                       | Score | Cross Score | Calc m/z | Diff (ppm) | Mass Match | Abund Match | Spacing Match |
|-------------------------------------|-----------------------------------|-----------------------------------|-------|-------------|----------|------------|------------|-------------|---------------|
| <input checked="" type="checkbox"/> | C <sub>32</sub> H <sub>25</sub> N | C <sub>32</sub> H <sub>26</sub> N | 95.33 |             | 424.206  | -0.4       | 99.85      | 86.18       | 97.28         |

3aj

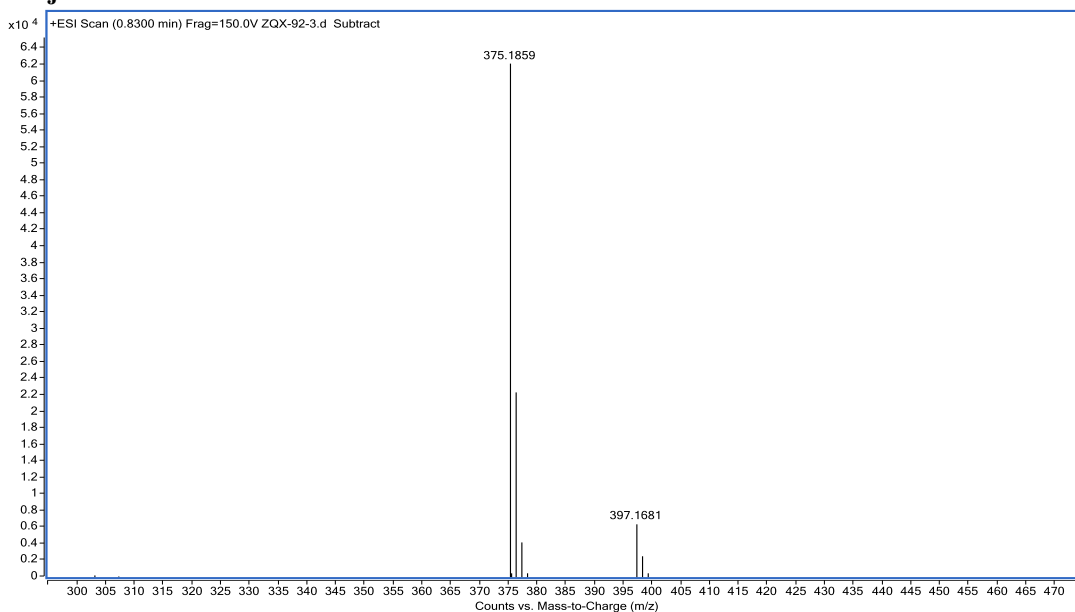

MS Formula Results: + Scan (0.8300 min) Sub (ZQX-92-3.d)

| m/z      | Ion                | Formula    | Abundance |
|----------|--------------------|------------|-----------|
| 375.1859 | (M+H) <sup>+</sup> | C27 H23 N2 | 62110.9   |

  

| Best                                | Formula (M) | Ion Formula | Score | Cross Score | Calc m/z | Diff (ppm) | Mass Match | Abund Match | Spacing Match |
|-------------------------------------|-------------|-------------|-------|-------------|----------|------------|------------|-------------|---------------|
| <input checked="" type="checkbox"/> | C27 H22 N2  | C27 H23 N2  | 92.25 |             | 375.1856 | -0.98      | 99.2       | 84.16       | 88.06         |

3ak

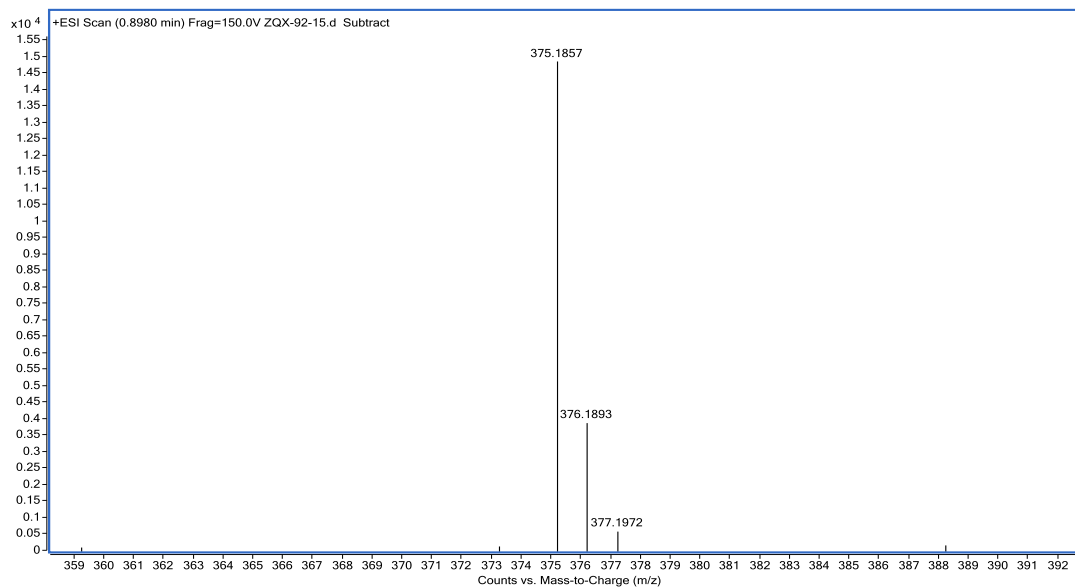

MS Formula Results: + Scan (0.8980 min) Sub (ZQX-92-15.d)

| m/z      | Ion                | Formula    | Abundance |
|----------|--------------------|------------|-----------|
| 375.1857 | (M+H) <sup>+</sup> | C27 H23 N2 | 14858     |

  

| Best                                | Formula (M) | Ion Formula | Score | Cross Score | Calc m/z | Diff (ppm) | Mass Match | Abund Match | Spacing Match |
|-------------------------------------|-------------|-------------|-------|-------------|----------|------------|------------|-------------|---------------|
| <input checked="" type="checkbox"/> | C27 H22 N2  | C27 H23 N2  | 95.32 |             | 375.1856 | -0.35      | 99.9       | 91.38       | 90.91         |

### 3a1

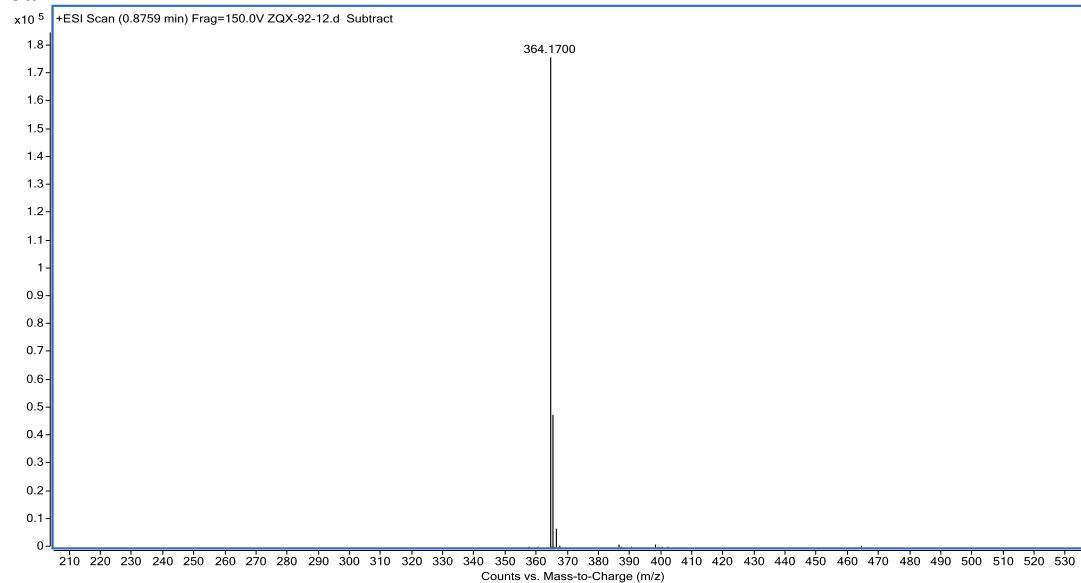

MS Formula Results: + Scan (0.8759 min) Sub (ZQX-92-12.d)

| m/z    | Ion                | Formula                             | Abundance |
|--------|--------------------|-------------------------------------|-----------|
| 364.17 | (M+H) <sup>+</sup> | C <sub>26</sub> H <sub>22</sub> N O | 175784.5  |

  

| Best                                | Formula (M)                         | Ion Formula                         | Score | Cross Score | Calc m/z | Diff (ppm) | Mass Match | Abund Match | Spacing Match |
|-------------------------------------|-------------------------------------|-------------------------------------|-------|-------------|----------|------------|------------|-------------|---------------|
| <input checked="" type="checkbox"/> | C <sub>26</sub> H <sub>21</sub> N O | C <sub>26</sub> H <sub>22</sub> N O | 98.79 |             | 364.1696 | -1.24      | 98.76      | 98.59       | 99.11         |
